# Supplementary material for: Chemoenzymatic conversion of amides to enantioenriched alcohols in aqueous medium
Source: PubMed Central journal article supplement (PMC7010078; doi:10.1038/s42004-019-0182-8), 2019-07-19
Supplement: NIHMS1068772-supplement-SI.pdf [file NIHMS1068772-supplement-SI.pdf]

## **Chemoenzymatic conversion of amides to enantioenriched alcohols in aqueous medium**

Jacob E. Dander, Maude Giroud, Sophie Racine, Evan R. Darzi,  
Oscar Alvizo, David Entwistle, and Neil K. Garg\*

*Department of Chemistry and Biochemistry,  
University of California, Los Angeles, California 90095*

|                                                                                    |           |
|------------------------------------------------------------------------------------|-----------|
| <b>Supplementary Methods</b> .....                                                 | <b>2</b>  |
| <b>Part I: Experimental Section</b> .....                                          | <b>2</b>  |
| <b>Materials and Methods</b> .....                                                 | <b>2</b>  |
| <b>In-Hood Vacuum Pump Set-Up and Specifications</b> .....                         | <b>3</b>  |
| <b>Experimental Procedures</b> .....                                               | <b>4</b>  |
| <b>A. Syntheses of Amide Substrates</b> .....                                      | <b>4</b>  |
| <b>B. Suzuki–Miyaura Reaction Optimization Experiments</b> .....                   | <b>6</b>  |
| <b>C. Scope of the Suzuki–Miyaura Coupling of Amides in Aqueous Media</b> .....    | <b>8</b>  |
| <b>D. Evaluation of KREds</b> .....                                                | <b>14</b> |
| <b>E. One-Pot Reaction Optimization Experiments</b> .....                          | <b>16</b> |
| <b>F. Scope of the One-Pot Reaction</b> .....                                      | <b>19</b> |
| <b>G. Verification of Enantiopurity</b> .....                                      | <b>27</b> |
| <b>i. Preparation of Racemic Alcohols</b> .....                                    | <b>27</b> |
| <b>ii. Enantioselective Diarylmethanol Synthesis by Asymmetric Arylation</b> ..... | <b>29</b> |
| <b>Part II: Bioinformatics Section</b> .....                                       | <b>32</b> |
| <b>Sequence Alignments</b> .....                                                   | <b>32</b> |
| <b>Supplementary References</b> .....                                              | <b>33</b> |
| <b><sup>1</sup>H NMR Spectra</b> .....                                             | <b>35</b> |
| <b><sup>13</sup>C NMR Spectra</b> .....                                            | <b>69</b> |
| <b>SFC Traces</b> .....                                                            | <b>75</b> |

## Supplementary Methods

### Part I: Experimental Section

**Materials and Methods** Unless stated otherwise, reactions were conducted in flame-dried glassware under an atmosphere of nitrogen and commercially obtained reagents were used as received. Anhydrous solvents were either freshly distilled or passed through activated alumina columns, unless otherwise stated. Non-commercially available reagents and substrates were synthesized following protocols specified in Section A, Section C, and Section G in the Experimental Procedures. Non-commercially available substrates were synthesized following protocols specified in Section A in the Experimental Procedures. Prior to use, toluene was purified by distillation and taken through five freeze-pump-thaw cycles. Deionized water used as a reaction solvent was purified using a Q-POD<sup>®</sup> Ultrapure Water Remote Dispenser from Millipore equipped with a Millipak Express 40 Q-POD (0.22  $\mu\text{m}$  filter), and it was sparged with  $\text{N}_2$  for a minimum of 30 min prior use. Isopropyl alcohol HPLC grade was obtained from Millipore Sigma. Benzylamine was obtained from Sigma–Aldrich. Boronate esters **SI-9**, **SI-11**, **SI-12**, and **SI-16** were obtained from Combi-Blocks, and boronate esters **23**, **SI-10**, **SI-13**, **SI-14**, and **SI-15** were obtained from Sigma–Aldrich. Carboxylic acid **SI-8**, *N,N*-dimethylpyridin-4-amine (DMAP), 1,3,5-trimethoxybenzaldehyde (**SI-22**), and benzaldehyde (**SI-24**) were obtained from Sigma–Aldrich.  $\text{Ni}(\text{cod})_2$  and 1,3-bis(2,6-diisopropylphenyl)-4,5-dihydroimidazol-2-ylidene (SIPr) were obtained from Strem Chemicals.  $\text{K}_3\text{PO}_4$  was obtained from Acros. 1,3,5-Trimethoxybenzene (TMB), *rac*-2-methylbenzhydrol (**21**), and *rac*-4-methylbenzhydrol (**22**) were obtained from Alfa Aesar. 3-(Ethyliminomethyleneamino)-*N,N*-dimethylpropan-1-amine (EDC) and di-*tert*-butyl dicarbonate ( $\text{Boc}_2\text{O}$ ) were obtained from Oakwood. Benzotriazol-1-ol (HOBt) was obtained from Chemimpex. Ketoreductases (KREDs) 401–404, P1-B12, and Recycle Mix P were obtained from Codexis. Benzophenones **14** and **16** were obtained from TCI. Phenyl boronic acid (**SI-23**) was obtained from Oakwood, and *N*-methyl-5-indole boronic acid (**SI-25**) was obtained from Combi-Blocks. Diethylzinc was obtained from Sigma–Aldrich as a 1.1 M solution in toluene. Phenyl magnesium bromide (**SI-21**) was obtained from Sigma–Aldrich as a 1.0 M solution in THF.  $\text{Na}_2\text{NADP}(+)\cdot 3\text{H}_2\text{O}$  was obtained from VWR. (*S*)-Methyl-1-tritylaziridine-2-carboxylate (**SI-20**) was obtained from Combi-Blocks. Reaction temperatures were controlled using an IKAmag

temperature modulator, and unless stated otherwise, performed at room temperature (approximately 23 °C). Thin-layer chromatography (TLC) was conducted with EMD gel 60 F<sub>254</sub> pre-coated plates (0.25 mm for analytical chromatography and 0.50 mm for preparative chromatography) and visualized using a combination of UV and potassium permanganate staining techniques. Silicycle Siliaflash P60 (particle size 40–63  $\mu\text{m}$ ) was used for flash column chromatography. <sup>1</sup>H NMR spectra were recorded on Bruker spectrometers (at 300, 400, and 500 MHz) and are reported relative to residual solvent signals. Data for <sup>1</sup>H NMR spectra are reported as follows: chemical shift ( $\delta$  ppm), multiplicity, coupling constant (Hz), integration. Data for <sup>13</sup>C NMR are reported in terms of chemical shift (125 MHz). For NMR spectra see Supplementary Figures 2–41. IR spectra were recorded on a Perkin-Elmer UATR Two FT-IR spectrometer and are reported in terms of frequency absorption ( $\text{cm}^{-1}$ ). DART-MS spectra were collected on a Thermo Exactive Plus MSD (Thermo Scientific) equipped with an ID-CUBE ion source and a Vapur Interface (IonSense Inc.). Both the source and MSD were controlled by Excalibur software version 3.0. The analyte was spotted onto OpenSpot sampling cards (IonSense Inc.) using  $\text{CHCl}_3$  as the solvent. Ionization was accomplished using UHP He plasma with no additional ionization agents. The mass calibration was carried out using Pierce LTQ Velos ESI (+) and (–) Ion calibration solutions (Thermo Fisher Scientific). Uncorrected melting points were measured using a digimelt MPA160 melting point apparatus. Optical rotations were measured with a Rudolf Autopol III Automatic Polarimeter. Determination of enantiopurity was carried out on a Mettler Toledo SFC (supercritical fluid chromatography) using Daicel ChiralPak AD–3, Daicel ChiralPak AD–H, Daicel ChiralPak AS–H, Daicel ChiralPak IA–3, Daicel ChiralPak IB–H, Daicel ChiralPak IC–3, and Daicel ChiralPak OJ–H columns. Data for SFC spectra are reported in enantiomeric excess (ee). For SFC chromatograms see Supplementary Figures 42–78.

### **In-Hood Vacuum Pump Set-Up and Specifications**

Some protocols described in Sections E and F of the Experimental Procedures require that reactions be conducted under reduced pressure. For these procedures, a vacuum was applied to reaction mixtures using a Büchi V-700 vacuum pump equipped with a Büchi V-850 vacuum controller set to 350 mbar (Supplementary Figure 1). An in-line 125 mL Woulff bottle and glass three-neck round bottom flask (1000 mL) were sequentially connected to the vacuum pump via

VWR brand “Select Grade” PVC tubing (1/4” i.d. x 1/2” o.d. x 1/8” wall thickness) and aided in stabilizing the applied vacuum. The PVC tubing was connected to the 2-dram reaction vials via the combined use of 24/40-hose barb adapters and 24/40 rotary evaporator adapters equipped with 15-425 connectors; joints were sealed with Teflon and/or electrical tape. A Granville-Phillips 475 Convectron® Vacuum Gauge Controller was used to assess the applied vacuum (347–373 mbar range of pressures observed over 1 min).

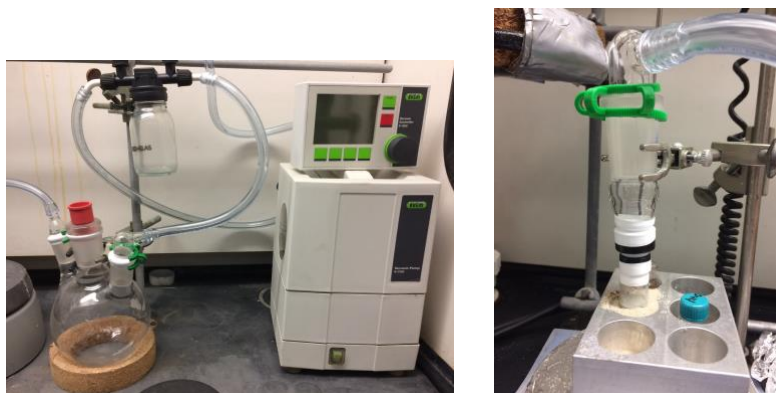

*Supplementary Figure 1.* In-hood vacuum pump set-up.

## Experimental Procedures

### A. Syntheses of Amide Substrates

Note: Supplementary information for the syntheses of amides **23**,<sup>1</sup> **SI-1**,<sup>2</sup> **SI-2**,<sup>2</sup> **SI-3**,<sup>1</sup> **SI-4**,<sup>2</sup> **SI-5**,<sup>3</sup> and **SI-6**<sup>2</sup> has been published and spectral data match those previously reported.

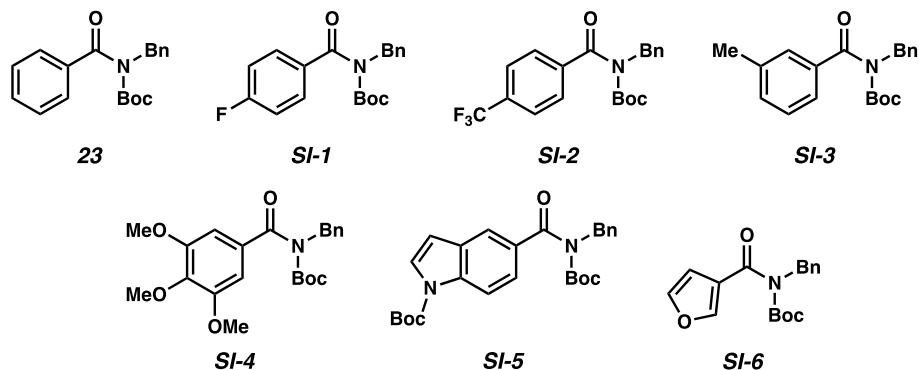



Synthesis of the remaining substrate, **SI-7**, is as follows:

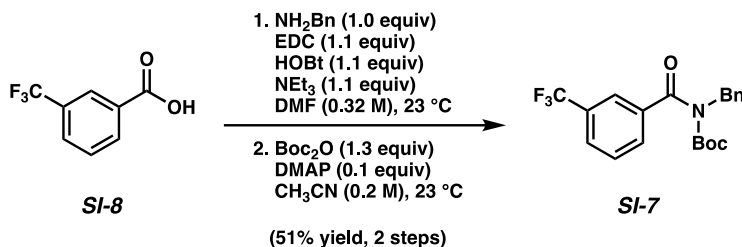

**Amide SI-7:** To a solution of carboxylic acid **SI-8** (3.0 g, 16.0 mmol, 1.0 equiv) in DMF (50 mL, 0.32 M) was added EDC (3.3 g, 17.0 mmol, 1.1 equiv), HOBt (2.7 g, 17.0 mmol, 1.1 equiv), triethylamine (2.4 mL, 17.0 mmol, 1.1 equiv), and benzylamine (1.9 mL, 17.0 mmol, 1.1 equiv). The resulting mixture was stirred at 23 °C for 15 h, and then diluted with deionized water (100 mL). The layers were separated and the aqueous layer was extracted with EtOAc (3 x 100 mL). The combined organic layers were then washed successively with deionized water (2 x 100 mL) and brine (100 mL) before being dried over  $\text{Na}_2\text{SO}_4$  and subsequently filtered. The volatiles were removed under reduced pressure. The resulting crude solid material was used in the subsequent step without further purification.

To a flask containing the crude material from the previous step was added acetonitrile (80 mL, 0.2 M) and the resulting mixture was stirred. DMAP (190 mg, 1.60 mmol, 0.1 equiv) and  $\text{Boc}_2\text{O}$  (4.5 g, 20.0 mmol, 1.3 equiv) were then added to the resultant solution and the reaction vessel was flushed with  $\text{N}_2$  for 5 min. The reaction mixture was then stirred at 23 °C for 38 h. The volatiles were removed under reduced pressure and the resulting crude residue was purified by flash chromatography (9:1 hexanes:EtOAc). Subsequently, the purified material was recrystallized from heptanes to yield amide **SI-7** (3.03 g, 51% yield, over two steps) as a white solid. Amide **SI-7**: m.p. 57–60 °C;  $R_f$  0.32 (4:1 hexanes:EtOAc);  $^1\text{H}$  NMR (500 MHz,  $\text{CDCl}_3$ ):  $\delta$  7.75 (br s, 1H), 7.72 (br d,  $J = 7.87$ , 1H), 7.69 (br d,  $J = 7.69$ , 1H), 7.53 (t,  $J = 7.69$ , 1H), 7.43–7.41 (m, 2H), 7.34 (t,  $J = 7.69$ , 2H), 7.28 (tt,  $J = 7.37$ , 2.24, 1H), 5.00 (s, 2H), 1.14 (s, 9H);  $^{13}\text{C}$  NMR (125 MHz,  $\text{CDCl}_3$ ):  $\delta$  171.7, 153.1, 138.6, 137.6, 130.7, 128.9, 128.7, 128.3, 127.7, 127.6 (q,  $^3J_{\text{CF}} = 3.79$ ), 124.4 (q,  $^3J_{\text{CF}} = 8.85$ ), 123.7 (d,  $^1J_{\text{CF}} = 272.51$ ), 84.0, 49.1, 27.5;  $^{19}\text{F}\{^1\text{H}\}$  NMR (376 MHz,  $\text{CDCl}_3$ ):  $\delta$  –62.81; IR (film): 2981, 1733, 1675, 1615, 1359, 1335, 1319, 1222, 1124, 1071, 978, 849, 747, 699, 652  $\text{cm}^{-1}$ ; HRMS-APCI ( $m/z$ ) [ $\text{M} + \text{H}$ ] $^+$  calcd for  $\text{C}_{20}\text{H}_{21}\text{NO}_3\text{F}_3^+$ , 380.1468; found 380.1450.

## B. Suzuki–Miyaura Reaction Optimization Experiments

### Representative Procedure A for reaction optimization. Ketone 14 (Supplementary Table 1, entry 1):

A 1-dram vial containing a magnetic stir bar was flame-dried under reduced pressure and then allowed to cool under N<sub>2</sub>. The vial was charged with amide substrate **23** (31.1 mg, 0.1 mmol, 1.0 equiv), 2-methylphenylboronic acid, pinacol ester (**24**, 65.4 mg, 0.3 mmol, 3.0 equiv), and K<sub>3</sub>PO<sub>4</sub> (42.4 mg, 0.2 mmol, 2.0 equiv). The vial was flushed with N<sub>2</sub> and then taken into a glove box. In the glove box, the vial was charged with SIPr (3.91 mg, 0.01 mmol, 10 mol%), Ni(cod)<sub>2</sub> (2.75 mg, 0.01 mmol, 10 mol%), and PhMe (0.1 mL, 1.0 M). Subsequently, the vial was removed from the glove box and degassed H<sub>2</sub>O (3.60 μL, 0.2 mmol, 2.0 equiv) was added. The vial was then capped with a Teflon-lined screw cap under a flow of N<sub>2</sub>, sealed with Teflon tape, and stirred at 50 °C for 24 h. After cooling to 23 °C, the mixture was diluted with hexanes (0.5 mL) and filtered over a plug of silica gel (10 mL of EtOAc eluent). The volatiles were removed under reduced pressure and the yield was determined by <sup>1</sup>H NMR analysis with 1,3,5-trimethoxybenzene as an external standard. The spectral data match those previously reported in the literature.<sup>4</sup>

### Representative Procedure B for reaction optimization. Ketone 14 (Supplementary Table 1, entry 7):

A 1-dram vial containing a magnetic stir bar was flame-dried under reduced pressure and then allowed to cool under N<sub>2</sub>. The vial was charged with amide substrate **23** (31.1 mg, 0.1 mmol, 1.0 equiv), 2-methylphenylboronic acid, pinacol ester (**24**, 65.4 mg, 0.3 mmol, 3.0 equiv), and K<sub>3</sub>PO<sub>4</sub> (42.4 mg, 0.2 mmol, 2.0 equiv). The vial was flushed with N<sub>2</sub> and then taken into a glove box. In the glove box, the vial was charged with SIPr (11.7 mg, 0.03 mmol, 30 mol%) and Ni(cod)<sub>2</sub> (4.2 mg, 0.015 mmol, 15 mol%). Subsequently, the vial was removed from the glove box and degassed H<sub>2</sub>O (0.2 mL, 0.5 M) was added. The vial was then capped with a Teflon-lined screw cap under a flow of N<sub>2</sub>, sealed with Teflon tape, and stirred at 60 °C for 24 h. After cooling to 23 °C, the mixture was diluted with EtOAc (1.0 mL) and the layers were separated. The aqueous layer was extracted with EtOAc (3 x 1 mL) and the combined organic layers were dried via passage through a plug of anhydrous MgSO<sub>4</sub> (10 mL of EtOAc eluent). The volatiles were removed under reduced

pressure and the yield was determined by  $^1\text{H}$  NMR analysis with 1,3,5-trimethoxybenzene as an external standard. The spectral data match those previously reported in the literature.<sup>4</sup>

*Optimization efforts that deviate from the above conditions are indicated below.*

**Supplementary Table 1.** Optimization of Reaction Conditions.<sup>a</sup>

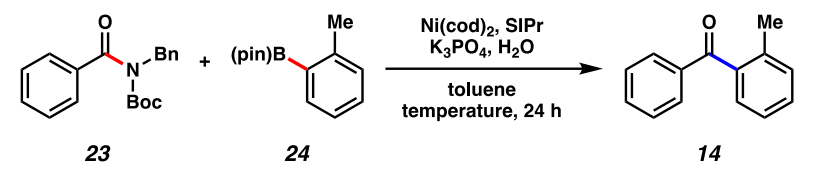

| Entry | Rep. Procedure | Toluene | H <sub>2</sub> O | Ni(cod) <sub>2</sub> (mol%) | SIPr (mol%) | Temp. (°C) | Yield |
|-------|----------------|---------|------------------|-----------------------------|-------------|------------|-------|
| 1     | A              | 1.0 M   | 2.0 equiv        | 10                          | 10          | 50         | 87%   |
| 2     | A              | –       | 2.0 equiv        | 10                          | 10          | 50         | 81%   |
| 3     | B              | –       | 1.0 M            | 10                          | 10          | 50         | 39%   |
| 4     | B              | –       | 0.5 M            | 10                          | 10          | 50         | 73%   |
| 5     | B              | –       | 0.5 M            | 10                          | 10          | 60         | 77%   |
| 6     | B              | –       | 0.5 M            | 10                          | 20          | 60         | 85%   |
| 7     | B              | –       | 0.5 M            | 15                          | 30          | 60         | 91%   |

<sup>a</sup> Yields were determined using  $^1\text{H}$  NMR analysis with 1,3,5-trimethoxybenzene (TMB) as an external standard.

### C. Scope of the Suzuki–Miyaura Coupling of Amides in Aqueous Media

**Representative Procedure A for the Suzuki–Miyaura coupling (Figure 2, synthesis of ketone 7 used as an example).**

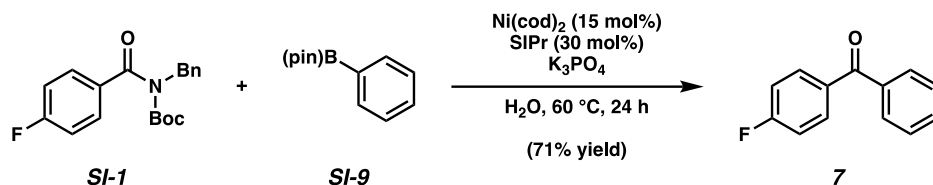

**Ketone 7:** A 1-dram vial containing a magnetic stir bar was flame-dried under reduced pressure and then allowed to cool under  $\text{N}_2$ . The vial was charged with amide substrate **SI-1** (32.9 mg, 0.1 mmol, 1.0 equiv), phenylboronic acid, pinacol ester (**SI-9**, 61.0 mg, 0.3 mmol, 3.0 equiv), and  $\text{K}_3\text{PO}_4$  (42.4 mg, 0.2 mmol, 2.0 equiv). The vial was flushed with  $\text{N}_2$  and then taken into a glove box. In the glove box, the vial was charged with SIPr (11.7 mg, 0.03 mmol, 30 mol%) and  $\text{Ni}(\text{cod})_2$  (4.2 mg, 0.015 mmol, 15 mol%). Subsequently, the vial was removed from the glove box and degassed  $\text{H}_2\text{O}$  (0.2 mL, 0.5 M) was added. The vial was then capped with a Teflon-lined screw cap under a flow of  $\text{N}_2$ , sealed with Teflon tape, and stirred at 60 °C for 24 h. After cooling to 23 °C, the mixture was diluted with EtOAc (1.0 mL) and the layers were separated. The aqueous layer was extracted with EtOAc (3 x 1 mL) and the combined organic layers were dried by passage through a plug of anhydrous  $\text{MgSO}_4$  (10 mL of EtOAc eluent), before the volatiles were removed under reduced pressure.

The crude material was purified by sequential preparative TLC (3:1:1 hexanes: $\text{CH}_2\text{Cl}_2$ :EtOAc; 10:1 hexanes:EtOAc) to generate ketone **7** (71% yield, average of two experiments) as a colorless oil. Ketone **7**:  $R_f$  0.40 (9:1 hexanes:EtOAc). The spectral data match those previously reported in the literature.<sup>5</sup>

**Representative Procedure B for the Suzuki–Miyaura coupling (Figure 2, synthesis of ketone 8 used as an example):**

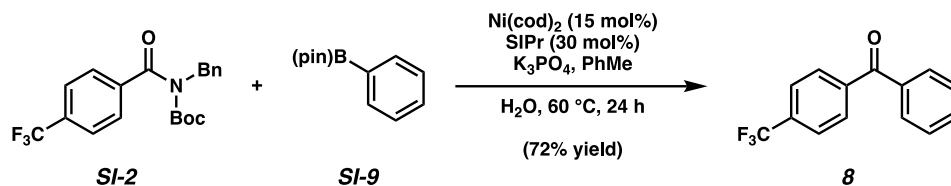

**Ketone 8.** A 1-dram vial containing a magnetic stir bar was flame-dried under reduced pressure and then allowed to cool under N<sub>2</sub>. The vial was charged with amide substrate **SI-2** (38.0 mg, 0.1 mmol, 1.0 equiv), phenylboronic acid, pinacol ester (**SI-9**, 61.2 mg, 0.3 mmol, 3.0 equiv), and K<sub>3</sub>PO<sub>4</sub> (42.4 mg, 0.2 mmol, 2.0 equiv). The vial was flushed with N<sub>2</sub> and then taken into a glove box. In the glove box, the vial was charged with SIPr (11.7 mg, 0.03 mmol, 30 mol%), Ni(cod)<sub>2</sub> (4.2 mg, 0.015 mmol, 15 mol%), and PhMe (50 μL). Subsequently, the vial was removed from the glove box and degassed H<sub>2</sub>O (0.2 mL, 0.5 M) was added. The vial was then capped with a Teflon-lined screw cap under a flow of N<sub>2</sub>, sealed with Teflon tape, and stirred at 60 °C for 24 h. After cooling to 23 °C, the mixture was diluted with EtOAc (1.0 mL) and the layers were separated. The aqueous layer was extracted with EtOAc (3 x 1 mL) and the combined organic layers were dried by passage through a plug of anhydrous MgSO<sub>4</sub> (10 mL of EtOAc eluent), before the volatiles were removed under reduced pressure.

The crude material was purified by sequential preparative TLC (9:1 hexanes:EtOAc, eluted twice; 9:1 hexanes:EtOAc, eluted twice) to generate ketone **8** (72% yield, average of two experiments) as a white solid. Ketone **8**: R<sub>f</sub> 0.57 (9:1 hexanes:EtOAc). The spectral data match those previously reported in the literature.<sup>6</sup>

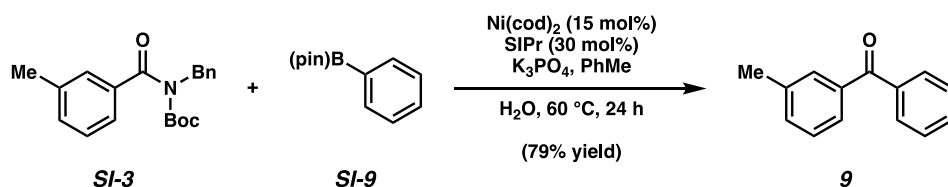

**Ketone 9.** Followed representative procedure B. Purification by sequential preparative TLC (9:1 hexanes/EtOAc, eluted twice; 5:1:1 hexanes:CH<sub>2</sub>Cl<sub>2</sub>:Et<sub>2</sub>O) generated ketone **9** (79% yield, average

of two experiments) as a colorless oil. Ketone **9**:  $R_f$  0.46 (9:1 hexanes:EtOAc). The spectral data match those previously reported in the literature.<sup>4</sup>

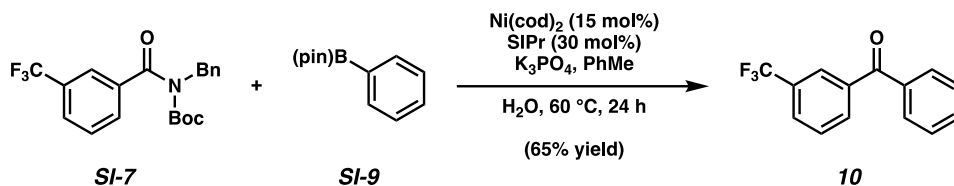

**Ketone 10.** Followed representative procedure B. Purification by sequential preparative TLC (9:1 hexanes:EtOAc; 100% benzene, eluted twice) generated ketone **10** (65% yield, average of two experiments) as a colorless oil. Ketone **10**:  $R_f$  0.48 (9:1 hexanes:EtOAc). The spectral data match those previously reported in the literature.<sup>7</sup>

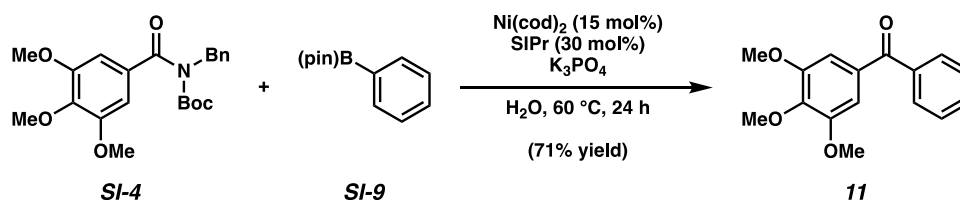

**Ketone 11.** Followed representative procedure A. Purification by sequential preparative TLC (4:1 hexanes:EtOAc; 30:40:1 hexanes:benzene:MeCN) generated ketone **11** (71% yield, average of two experiments) as a white solid. Ketone **11**:  $R_f$  0.12 (10:1 hexanes:EtOAc). The spectral data match those previously reported in the literature.<sup>8</sup>

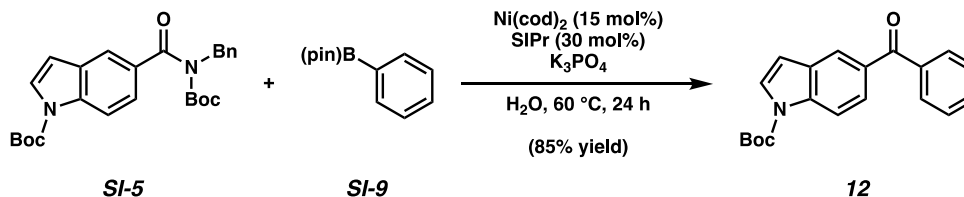

**Ketone 12.** Followed representative procedure A. Purification by preparative TLC (10:1 hexanes:EtOAc) generated ketone **12** (85% yield, average of two experiments) as a colorless oil. Ketone **12**:  $R_f$  0.38 (10:1 hexanes:EtOAc). The spectral data match those previously reported in the literature.<sup>9</sup>

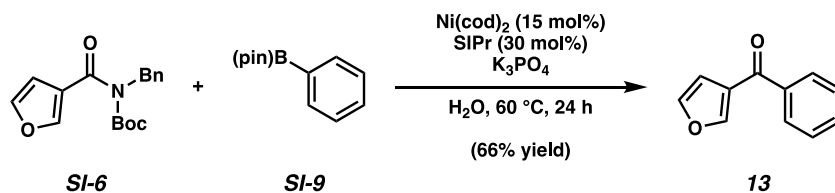

**Ketone 13.** Followed representative procedure A. Purification by sequential preparative TLC (10:1 hexanes:EtOAc; 100% benzene) generated ketone **13** (66% yield, average of two experiments) as a colorless oil. Ketone **13**:  $R_f$  0.38 (10:1 hexanes:EtOAc). The spectral data match those previously reported in the literature.<sup>10</sup>

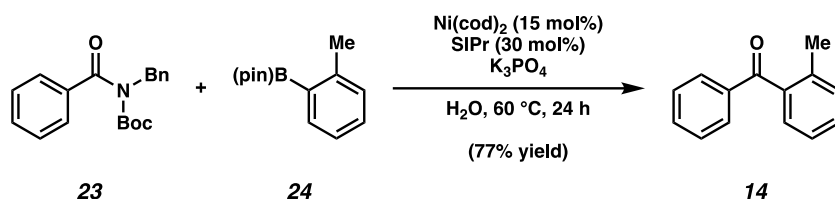

**Ketone 14.** Followed representative procedure A. Purification by preparative TLC (9:1 hexanes:EtOAc) generated ketone **14** (77% yield, average of two experiments) as a colorless oil. Ketone **14**:  $R_f$  0.54 (9:1 hexanes:EtOAc). The spectral data match those previously reported in the literature.<sup>4</sup>

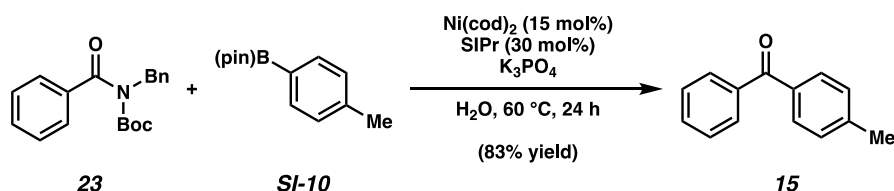

**Ketone 15.** A 1-dram vial containing a magnetic stir bar was flame-dried under reduced pressure and then allowed to cool under  $\text{N}_2$ . The vial was charged with amide substrate **23** (31.1 mg, 0.1 mmol, 1.0 equiv), 4-methylphenylboronic acid, pinacol ester (**SI-10**, 65.4 mg, 0.3 mmol, 3.0 equiv), and  $\text{K}_3\text{PO}_4$  (42.4 mg, 0.2 mmol, 2.0 equiv). The vial was flushed with  $\text{N}_2$  and then taken into a glove box. In the glove box, the vial was charged with SIPr (11.7 mg, 0.03 mmol, 30 mol%) and  $\text{Ni(cod)}_2$  (4.2 mg, 0.015 mmol, 15 mol%). Subsequently, the vial was removed from the glove box and degassed  $\text{H}_2\text{O}$  (0.2 mL, 0.5 M) was added. The vial was then capped with a Teflon-lined screw cap under a flow of  $\text{N}_2$ , sealed with Teflon tape, and stirred at 60 °C for 24 h. After cooling

to 23 °C, the mixture was diluted with EtOAc (1.0 mL) and the layers were separated. The aqueous layer was extracted with EtOAc (3 x 1 mL) and the combined organic layers were dried by passage through a plug of anhydrous MgSO<sub>4</sub> (10 mL of EtOAc eluent), before the volatiles were removed under reduced pressure. To ease purification, unreacted 4-methylphenylboronic acid, pinacol ester was converted to the corresponding boronic acid following a known procedure:<sup>11</sup> A scintillation vial containing the crude material and a magnetic stir bar was purged with N<sub>2</sub> for 5 min. The crude material was dissolved in 7.5:1 THF:H<sub>2</sub>O (1.7 mL), and stirred for 5 min at 23 °C. The resultant mixture was then treated with NaIO<sub>4</sub> (193 mg, 0.9 mmol, 9.0 equiv) and stirred for 30 min at 23 °C, before being treated with 1.0 M HCl (0.3 mL) and stirred for an additional 17 h at this temperature. This mixture was then diluted with deionized H<sub>2</sub>O (5 mL) and EtOAc (12 mL) and the layers were separated. The aqueous phase was extracted with EtOAc (3 x 6 mL), and the combined organic layers were washed sequentially with deionized H<sub>2</sub>O (2 x 10 mL) and brine (10 mL), dried over Na<sub>2</sub>SO<sub>4</sub>, filtered, and the volatiles were removed under reduced pressure. Purification by preparative TLC (29:1 hexanes:EtOAc) generated ketone **15** (83% yield, average of two experiments) as a colorless oil. Ketone **15**: R<sub>f</sub> 0.54 (5:1 hexanes:EtOAc). The spectral data match those previously reported in the literature.<sup>12</sup>

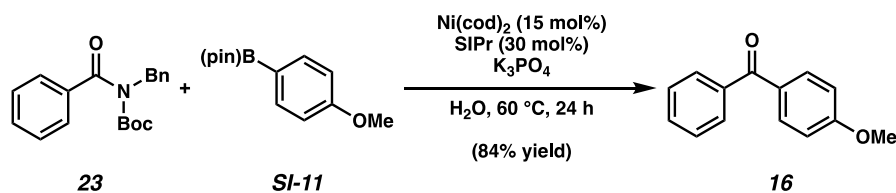

**Ketone 16.** Followed representative procedure A. Purification by sequential preparative TLC (9:1 hexanes:EtOAc eluted twice; 100% benzene, eluted three times) generated ketone **16** (84% yield, average of two experiments) as a light yellow oil. Ketone **16**: R<sub>f</sub> 0.30 (9:1 hexanes:EtOAc). The spectral data match those previously reported in the literature.<sup>4</sup>



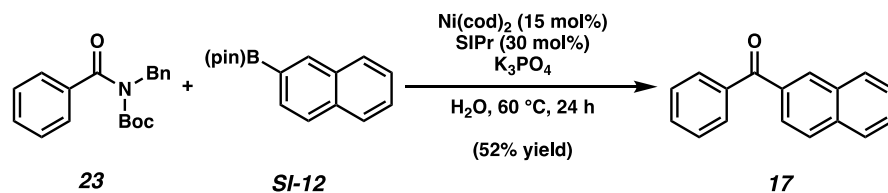

**Ketone 17.** Followed representative procedure A. Purification by sequential preparative TLC (9:1 hexanes:EtOAc, eluted twice; 5:1:1 hexanes:CH<sub>2</sub>Cl<sub>2</sub>:Et<sub>2</sub>O; 100% benzene, eluted twice) generated ketone **17** (52% yield, average of two experiments) as a white solid. Ketone **17**:  $R_f$  0.44 (9:1 hexanes:EtOAc). The spectral data match those previously reported in the literature.<sup>13</sup>

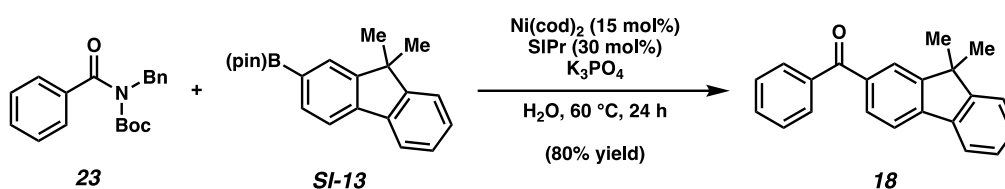

**Ketone 18.** Followed representative procedure A. Purification by sequential preparative TLC (9:1 hexanes:EtOAc, eluted twice; 100% benzene, eluted twice) generated ketone **18** (80% yield, average of two experiments) as a white solid. Ketone **18**: m.p. 122–124 °C;  $R_f$  0.40 (9:1 hexanes:EtOAc); <sup>1</sup>H NMR (500 MHz, CDCl<sub>3</sub>): δ 7.95 (t,  $J$  = 1.15, 1H), 7.85–7.83 (m, 2H), 7.81–7.79 (m, 1H), 7.79 (d,  $J$  = 1.09, 2H), 7.61 (tt,  $J$  = 7.45, 1.36, 1H), 7.53–7.51 (m, 2H), 7.50–7.48 (m, 1H), 7.41–7.37 (m, 2H), 1.53 (s, 6H); <sup>13</sup>C NMR (125 MHz, CDCl<sub>3</sub>): δ 196.9, 154.9, 153.8, 143.8, 138.4, 138.1, 136.4, 132.3, 130.3, 130.1, 128.7, 128.4, 127.4, 124.5, 123.0, 121.1, 119.6, 47.2, 27.1; IR (film): 3064, 2950, 2920, 2856, 1654, 1606, 1471, 1446, 1317, 1302, 1278, 1242, 759, 739, 722, 698, 684 cm<sup>-1</sup>; HRMS-APCI ( $m/z$ ) [ $M + H$ ]<sup>+</sup> calcd for C<sub>22</sub>H<sub>19</sub>O<sup>+</sup>, 299.1430; found 299.1418.

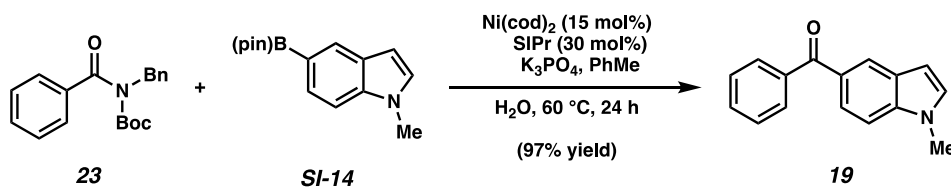

**Ketone 19.** Followed representative procedure B. Purification by sequential preparative TLC (9:1 hexanes:EtOAc; 5:1:1 hexanes:Et<sub>2</sub>O:CH<sub>2</sub>Cl<sub>2</sub>; 100% benzene, eluted three times) generated ketone **19** (97% yield, average of two experiments) as a colorless oil. Ketone **19**: m.p. 82–84 °C;  $R_f$  0.14

(9:1 hexanes:EtOAc);  $^1\text{H}$  NMR (500 MHz,  $\text{CDCl}_3$ ):  $\delta$  8.11 (dd,  $J = 1.74, 0.64$ , 1H), 7.83 (dd,  $J = 8.68, 1.60$ , 1H), 7.81–7.79 (m, 2H), 7.57 (tt,  $J = 7.47, 1.36$ , 1H), 7.50–7.47 (m, 2H), 7.39 (d,  $J = 8.69$ , 1H), 7.14 (d,  $J = 3.12$ , 1H), 6.58 (dd,  $J = 3.20, 0.81$ , 1H), 3.86 (s, 3H);  $^{13}\text{C}$  NMR (125 MHz,  $\text{CDCl}_3$ ):  $\delta$  197.4, 139.3, 139.1, 131.7, 130.5, 130.0, 129.3, 128.2, 127.8, 125.6, 124.0, 109.2, 103.1, 33.2; IR (film): 1645, 1605, 1446, 1318, 1273, 1095, 729, 671  $\text{cm}^{-1}$ ; HRMS-APCI ( $m/z$ ) [ $\text{M} + \text{H}$ ] $^+$  calcd for  $\text{C}_{16}\text{H}_{14}\text{NO}^+$ , 236.1070; found 236.1060.

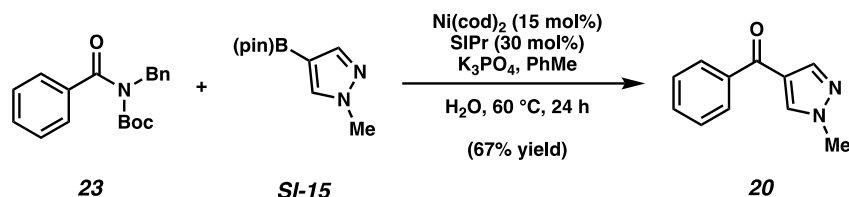

**Ketone 20.** Followed representative procedure B. Purification by sequential preparative TLC (1:1 hexanes:EtOAc; 1:1:1 hexanes: $\text{CH}_2\text{Cl}_2$ :Et $_2\text{O}$ ) generated ketone **20** (67% yield, average of two experiments) as a colorless oil. Ketone **20**:  $R_f$  0.31 (1:1 hexanes:EtOAc). The spectral data match those previously reported in the literature.<sup>14</sup>

#### D. Evaluation of KREDs

Note: The following protocol was adapted from the Codex<sup>®</sup> KRED Screening Kit – Screening Procedure P.

##### Representative Procedure for evaluating KREDs. Alcohol 21 (Supplementary Table 2, entry 1):

A 1-dram vial containing a magnetic stir bar was charged with KRED-401 (10 mg). To the vial was added Recycle Mix P (18.2 mg) as a solution in deionized  $\text{H}_2\text{O}$  (1.0 mL). The resultant mixture was stirred slowly at 23  $^\circ\text{C}$  until complete dissolution of the enzyme was observed. 2-Methylbenzophenone (**14**, 4.92 mg, 0.025 mmol, 1.0 equiv) was added to the mixture as a solution in *i*-PrOH (0.1 mL). The vial was then capped with a Teflon-lined screw cap and stirred at 35  $^\circ\text{C}$  and a rate of 450 RPM for 24 h. After cooling to 23  $^\circ\text{C}$ , the mixture was diluted with EtOAc (2.0 mL) and the layers were allowed to separate. The aqueous layer was extracted with EtOAc (3 x 2 mL) and the combined organic layers were dried by passage through a plug of anhydrous  $\text{MgSO}_4$  (10 mL of EtOAc eluent). The volatiles were removed under reduced pressure and the crude

residue was purified by preparative TLC (10:1 hexanes:EtOAc) to yield alcohol **21** (1.4 mg, 28% yield, 87% ee) as a white solid. The spectral data match those previously reported in the literature for (*R*)-**21**.<sup>15</sup>

*Absolute stereochemistry was assigned by comparison with published  $[\alpha]_D$  values for alcohols (*R*)-21<sup>16</sup> and (*R*)-22.<sup>17</sup>*

*Screening efforts that deviate from the above conditions are indicated below.*

**Supplementary Table 2.** Evaluation of KREDs in the reduction of ketones **14** and **16**.

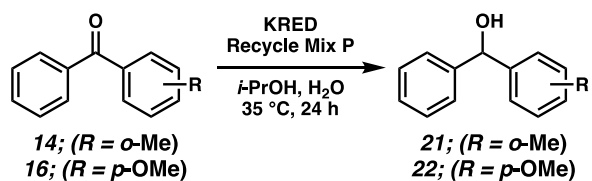

| Entry | R     | KRED   | Yield | ee  | (R/S) |
|-------|-------|--------|-------|-----|-------|
| 1     | 2-Me  | 401    | 28%   | 87% | (S)   |
| 2     | 2-Me  | 402    | 33%   | 76% | (S)   |
| 3     | 2-Me  | 403    | 42%   | 80% | (S)   |
| 4     | 2-Me  | 404    | 59%   | 87% | (S)   |
| 5     | 2-Me  | P1-B12 | 55%   | 99% | (R)   |
| 6     | 4-OMe | 401    | 54%   | 39% | (R)   |
| 7     | 4-OMe | 402    | 56%   | 8%  | (R)   |
| 8     | 4-OMe | 403    | 63%   | 3%  | (R)   |
| 9     | 4-OMe | 404    | 60%   | 9%  | (S)   |
| 10    | 4-OMe | P1-B12 | 56%   | 94% | (S)   |

## E. One-Pot Reaction Optimization Experiments

### Representative Procedure for the Suzuki–Miyaura coupling (step 1, Supplementary Table 3, entries 1–5):

A 2-dram vial containing a magnetic stir bar was flame-dried under reduced pressure and then allowed to cool under N<sub>2</sub>. The vial was charged with amide substrate **23** (31.1 mg, 0.1 mmol, 1.0 equiv), 2-methylphenylboronic acid, pinacol ester (**24**, 65.4 mg, 0.3 mmol, 3.0 equiv), and K<sub>3</sub>PO<sub>4</sub> (42.4 mg, 0.2 mmol, 2.0 equiv). The vial was flushed with N<sub>2</sub> for 5 min and then taken into a glove box. In the glove box, the vial was charged with SIPr (11.7 mg, 0.03 mmol, 30 mol%) and Ni(cod)<sub>2</sub> (4.2 mg, 0.015 mmol, 15 mol%). Subsequently, the vial was removed from the glove box and degassed H<sub>2</sub>O (0.2 mL, 0.5 M) was added. The vial was then capped with a Teflon-lined screw cap under a flow of N<sub>2</sub>, sealed with Teflon tape, and stirred at 60 °C for 24 h.

*For all experiments in Supplementary Table 3, the above procedure was employed for the first step (Suzuki–Miyaura coupling). Table entries vary only in the protocol used for the second step (enzymatic reduction) of the reaction, as described in the following Representative Procedures A–C.*

**Representative Procedure A for optimization of the KRED reduction (step 2). Alcohol 21 (Supplementary Table 3, entry 1):** The crude reaction mixture from step 1 was removed from heat and cooled to 23 °C. To the reaction mixture was added *i*-PrOH (400 μL, 52.0 equiv) and the resultant mixture was stirred for 5 min before stopping stirring and allowing the layers to separate in the reaction vessel. Recycle Mix P (78.2 mg) and KRED-P1-B12 (40.0 mg) were then added as a single solution in deionized H<sub>2</sub>O (4 mL) with stirring at 23 °C. The reaction was heated to 35 °C and stirred at a rate of 450 RPM for 24 h.

The reaction mixture was cooled to 23 °C and transferred to a separatory funnel with deionized H<sub>2</sub>O (15 mL), brine (5 mL), and EtOAc (30 mL). The layers were separated and the aqueous layer was extracted with EtOAc (3 x 30 mL). The combined organic layers were dried over anhydrous Na<sub>2</sub>SO<sub>4</sub>, filtered, and the volatiles were removed under reduced pressure. The yield was determined by <sup>1</sup>H NMR analysis with 1,3,5-trimethoxybenzene as an external standard. The spectral data match those previously reported in the literature for (**R**)-**21**.<sup>15</sup>

**Representative Procedure B for optimization of the KRED reduction (step 2). Alcohol 21 (Supplementary Table 3, entries 2–4):** The crude reaction mixture from step 1 was removed from heat and cooled to 23 °C before being neutralized with 1.0 M HCl (0.28 mL). To the reaction mixture was added *i*-PrOH (400 µL, 52.0 equiv) and the resultant mixture was stirred for 5 min before stopping stirring and allowing the layers to separate in the reaction vessel. Recycle Mix P (78.2 mg) and KRED-P1-B12 (40.0 mg) were then added as a single solution in deionized H<sub>2</sub>O (4 mL). The reaction was then heated to 35 °C, placed under reduced pressure (350 mbar, see In-Hood Pump Set-Up and Specifications), and the mixture was stirred at a rate of 450 RPM for 24 h.

The vacuum was relieved, the reaction mixture was cooled to 23 °C, and transferred to a separatory funnel with deionized H<sub>2</sub>O (15 mL), brine (5 mL), and EtOAc (30 mL). The layers were separated and the aqueous layer was extracted with EtOAc (3 x 30 mL). The combined organic layers were dried over anhydrous Na<sub>2</sub>SO<sub>4</sub>, filtered, and the volatiles were removed under reduced pressure. The yield was determined by <sup>1</sup>H NMR analysis with 1,3,5-trimethoxybenzene as an external standard. The spectral data match those previously reported in the literature for (*R*)-**21**.<sup>15</sup>

**Representative Procedure C for optimization of the KRED reduction (step 2). Alcohol (*R*)-21 (Supplementary Table 3, entry 5):** The crude reaction mixture from step 1 was removed from heat and cooled to 23 °C before being neutralized with 1.0 M HCl (0.28 mL). To the reaction mixture was added *i*-PrOH (400 µL, 52.0 equiv) and the resultant mixture was stirred for 5 min before stopping stirring and allowing the layers to separate in the reaction vessel. Recycle Mix P (78.2 mg) and KRED-P1-B12 (40.0 mg) were then added as a single solution in deionized H<sub>2</sub>O (4 mL). The reaction was heated to 35 °C, placed under reduced pressure (350 mbar, see In-Hood Pump Set-Up and Specifications), and the mixture was stirred at a rate of 900 RPM for 24 h.

After 24 h, the vacuum was relieved and Na<sub>2</sub>NADP(+)**•**3H<sub>2</sub>O (3.7 mg, 0.044 equiv) was added. The reaction was again heated to 35 °C, the pressure of the reaction vessel was reduced to 350 mbar using an in-hood vacuum pump, and the mixture was stirred at a rate of 900 RPM for an additional 24 h.

The vacuum was relieved, the reaction was cooled to 23 °C, and the reaction mixture was transferred to a separatory funnel with deionized H<sub>2</sub>O (15 mL), brine (5 mL), and EtOAc (30 mL). The layers were separated and the aqueous layer was extracted with EtOAc (3 x 30 mL). The

combined organic layers were dried over anhydrous Na<sub>2</sub>SO<sub>4</sub>, filtered, and the volatiles were removed under reduced pressure. The yield was determined by <sup>1</sup>H NMR analysis with 1,3,5-trimethoxybenzene as an external standard. The spectral data match those previously reported in the literature for (*R*)-**21**.<sup>15</sup>

*Optimization efforts that deviate from the above conditions are indicated below.*

**Supplementary Table 3.** Optimization of the KRED reduction (step 2) in the sequential, one-pot reaction.<sup>a</sup>

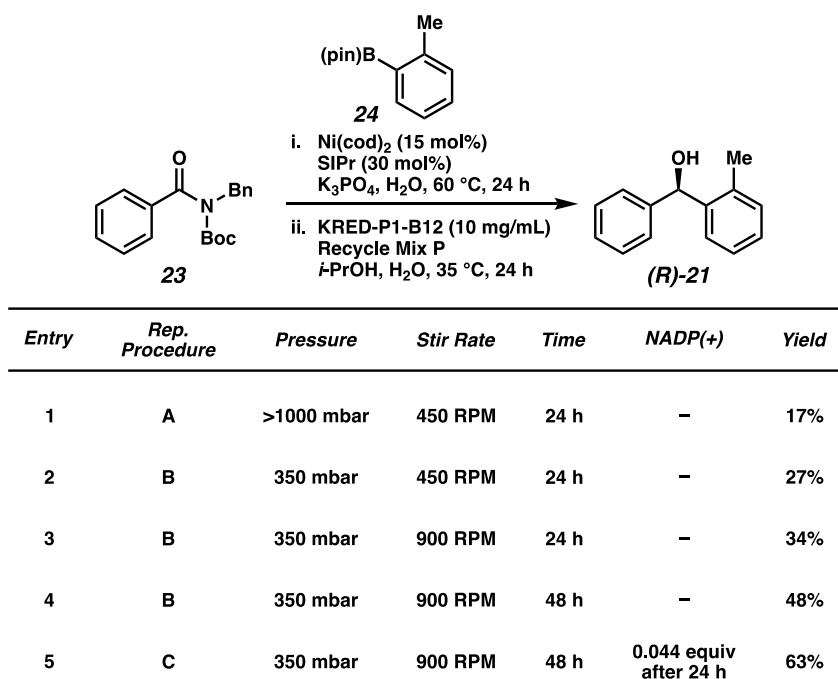

<sup>a</sup> Yields were determined using <sup>1</sup>H NMR analysis with 1,3,5-trimethoxybenzene (TMB) as an external standard.

## F. Scope of the One-Pot Reaction

**Representative Procedure A for the one-pot, chemoenzymatic alcohol synthesis from amides (Figures 3 and 4, synthesis of alcohol (*R*)-25 used as an example).**

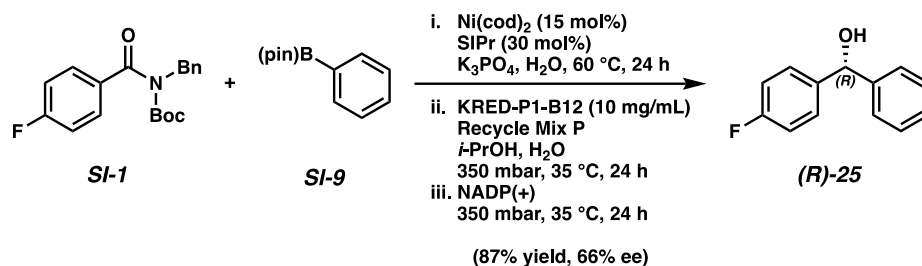

**Alcohol (*R*)-25.** A 2-dram vial containing a magnetic stir bar was flame-dried under reduced pressure and then allowed to cool under  $\text{N}_2$ . The vial was charged with amide substrate **SI-1** (32.9 mg, 0.1 mmol, 1.0 equiv), phenylboronic acid, pinacol ester (**SI-9**, 61.2 mg, 0.3 mmol, 3.0 equiv), and  $\text{K}_3\text{PO}_4$  (42.4 mg, 0.2 mmol, 2.0 equiv). The vial was flushed with  $\text{N}_2$  and then taken into a glove box. In the glove box, the vial was charged with SIPr (11.7 mg, 0.03 mmol, 30 mol%) and  $\text{Ni}(\text{cod})_2$  (4.2 mg, 0.015 mmol, 15 mol%). Subsequently, the vial was removed from the glove box and degassed  $\text{H}_2\text{O}$  (0.2 mL, 0.5 M) was added. The vial was then capped with a Teflon-lined screw cap under a flow of  $\text{N}_2$ , sealed with Teflon tape, and stirred at 60 °C for 24 h.

The crude reaction mixture was removed from heat and cooled to 23 °C before being neutralized with 1.0 M HCl (0.28 mL). To the reaction mixture was added *i*-PrOH (400  $\mu\text{L}$ , 52.0 equiv) and the resultant mixture was stirred for 5 min before stopping stirring and allowing the layers to separate in the reaction vessel. Recycle Mix P (78.2 mg) and KRED-P1-B12 (40.0 mg) were then added as a single solution in deionized  $\text{H}_2\text{O}$  (4 mL). The reaction was then heated to 35 °C, placed under reduced pressure (350 mbar, see In-Hood Pump Set-Up and Specifications), and the mixture was stirred at a rate of 900 RPM for 24 h.

After 24 h, the vacuum was relieved and  $\text{Na}_2\text{NADP}(+)\cdot 3\text{H}_2\text{O}$  (3.7 mg, 0.044 equiv) was added. The reaction was again heated to 35 °C, placed under reduced pressure (350 mbar, see In-Hood Pump Set-Up and Specifications), and the mixture was stirred at a rate of 900 RPM for an additional 24 h.

The vacuum was relieved, the reaction was cooled to 23 °C, and the reaction mixture was transferred to a separatory funnel with deionized H<sub>2</sub>O (15 mL), brine (5 mL), and EtOAc (30 mL). The layers were separated and the aqueous layer was extracted with EtOAc (3 x 30 mL). The combined organic layers were dried over anhydrous Na<sub>2</sub>SO<sub>4</sub>, filtered, and the volatiles were removed under reduced pressure.

The crude material was purified by preparative TLC (plate neutralized with a 2% Et<sub>3</sub>N in hexanes solution prior to loading crude material; 17:2:1 hexanes:benzene:Et<sub>2</sub>O) to yield alcohol (**R**)-**25** (87% yield, average of two experiments, 66% ee) as a white solid. Alcohol (**R**)-**25**: [ $\alpha$ ]<sub>D</sub><sup>22.7</sup> = -7.60° (*c* = 1.00, CHCl<sub>3</sub>); R<sub>f</sub> 0.23 (5:1 hexanes:EtOAc). Chiral SFC: 250 mm CHIRALPAK IC-3, 1% *i*-PrOH, 3.5 mL/min,  $\lambda$  = 216 nm, 35 °C, nozzle pressure = 100 bar CO<sub>2</sub>, t<sub>R1</sub> (major) = 17.9 min, t<sub>R2</sub> (minor) = 19.5 min. The spectral data match those previously reported in the literature for (**R**)-**25**.<sup>17</sup> The major enantiomer product was assigned by comparison to published [ $\alpha$ ]<sub>D</sub> values for (**R**)-**25**.<sup>17</sup>

**Representative Procedure B for the one-pot chemoenzymatic alcohol synthesis from amides (Figure 3, synthesis of alcohol (**R**)-**26** used as an example).**

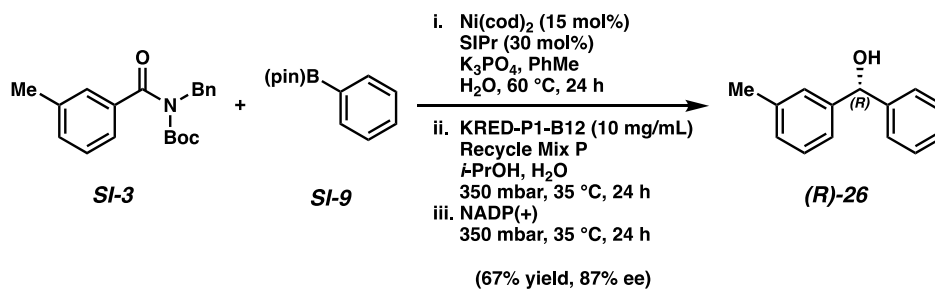

**Alcohol (**R**)-**26**.** A 2-dram vial containing a magnetic stir bar was flame-dried under reduced pressure and then allowed to cool under N<sub>2</sub>. The vial was charged with amide substrate **SI-3** (32.5 mg, 0.1 mmol, 1.0 equiv), phenylboronic acid, pinacol ester (**SI-9**, 61.2 mg, 0.3 mmol, 3.0 equiv), and K<sub>3</sub>PO<sub>4</sub> (42.4 mg, 0.2 mmol, 2.0 equiv). The vial was flushed with N<sub>2</sub> and then taken into a glove box. In the glove box, the vial was charged with SIPr (11.7 mg, 0.03 mmol, 30 mol%), Ni(cod)<sub>2</sub> (4.2 mg, 0.015 mmol, 15 mol%), and PhMe (50  $\mu$ L). Subsequently, the vial was removed from the glove box and degassed H<sub>2</sub>O (0.2 mL, 0.5 M) was added. The vial was then capped with



a Teflon-lined screw cap under a flow of N<sub>2</sub>, sealed with Teflon tape, and stirred at 60 °C for 24 h.

The crude reaction mixture was removed from heat and cooled to 23 °C before being neutralized with 1.0 M HCl (0.28 mL). To the reaction mixture was added *i*-PrOH (400 μL, 52.0 equiv) and the resultant mixture was stirred for 5 min before stopping stirring and allowing the layers to separate in the reaction vessel. Recycle Mix P (78.2 mg) and KRED-P1-B12 (40.0 mg) were then added as a single solution in deionized H<sub>2</sub>O (4 mL). The reaction was then heated to 35 °C, placed under reduced pressure (350 mbar, see In-Hood Pump Set-Up and Specifications), and the mixture was stirred at a rate of 900 RPM for 24 h.

After 24 h, the vacuum was relieved, the reaction was cooled to 23 °C, and Na<sub>2</sub>NADP(+) $\cdot$ 3H<sub>2</sub>O (3.7 mg, 0.044 equiv) was added. The reaction was again heated to 35 °C, the pressure of the reaction vessel was reduced to 350 mbar using an in-hood vacuum pump, and the mixture was stirred at a rate of 900 RPM for an additional 24 h.

The vacuum was relieved, the reaction was cooled to 23 °C, and the reaction mixture was transferred to a separatory funnel with deionized H<sub>2</sub>O (15 mL), brine (5 mL), and EtOAc (30 mL). The layers separated and the aqueous layer was extracted with EtOAc (3 x 30 mL). The combined organic layers were dried over anhydrous Na<sub>2</sub>SO<sub>4</sub>, filtered, and the volatiles were removed under reduced pressure.

The crude material was purified by preparative TLC (plate neutralized with a 2% Et<sub>3</sub>N in hexanes solution prior to loading crude material; 17:2:1 hexanes:benzene:Et<sub>2</sub>O) to yield alcohol (***R***)-**26** (67% yield, average of two experiments, 87% ee) as a white solid. Alcohol (***R***)-**26**:  $[\alpha]_D^{25.4} = +2.30^\circ$  ( $c = 1.00$ , CH<sub>2</sub>Cl<sub>2</sub>);  $R_f$  0.35 (5:1 hexanes:EtOAc). Chiral SFC: 250 mm CHIRALPAK AD-3, 5% MeOH, 3.5 mL/min,  $\lambda = 216$  nm, 35 °C, nozzle pressure = 100 bar CO<sub>2</sub>,  $t_{R1}$  (minor) = 7.0 min,  $t_{R2}$  (major) = 7.6 min. The spectral data match those previously reported in the literature for *rac*-**26**.<sup>18</sup> The major enantiomer product was assigned by comparison to published  $[\alpha]_D$  values for (***R***)-**26**.<sup>19</sup>

*Any modifications of the conditions shown in the representative procedures above are specified in the following schemes and text.*

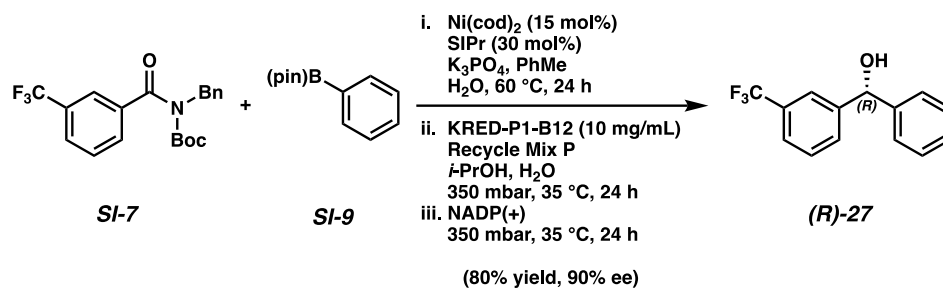

**Alcohol (R)-27:** Followed representative procedure B. Purification by preparative TLC (plate neutralized with a 2% Et<sub>3</sub>N in hexanes solution prior to loading crude material; 17:2:1 hexanes:benzene:Et<sub>2</sub>O) yielded alcohol (**R**)-**27** (80% yield, average of two experiments, 90% ee) as a colorless oil. Alcohol (**R**)-**27**:  $[\alpha]_D^{25.5} = -15.80^\circ$  ( $c = 1.00$ , CHCl<sub>3</sub>);  $R_f$  0.30 (5:1 hexanes:EtOAc). Chiral SFC: 250 mm CHIRALPAK IB–H, 2% MeOH, 3.5 mL/min,  $\lambda = 216$  nm, 35 °C, nozzle pressure = 100 bar CO<sub>2</sub>,  $t_{R1}$  (minor) = 10.9 min,  $t_{R2}$  (major) = 11.8 min. The spectral data match those previously reported in the literature for *rac*-**27**.<sup>20</sup> The major enantiomer product was assigned by comparison to published  $[\alpha]_D$  values for (**R**)-**27**.<sup>21</sup>

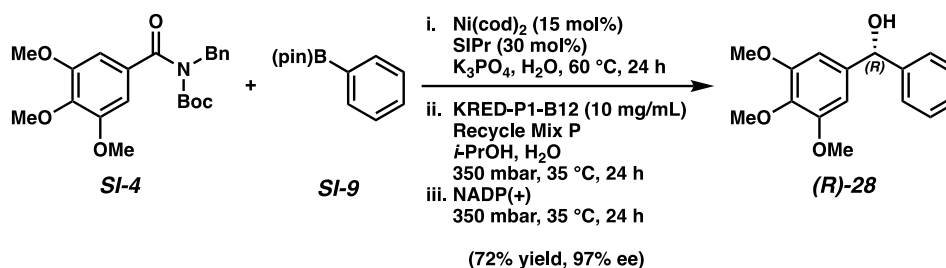

**Alcohol (R)-28:** Followed representative procedure A. Purification by preparative TLC (plate neutralized with a 2% Et<sub>3</sub>N in hexanes solution prior to loading crude material; 3:2:1 hexanes:benzene:Et<sub>2</sub>O) yielded alcohol (**R**)-**28** (72% yield, average of two experiments, 97% ee) as a white solid. Alcohol (**R**)-**28**:  $[\alpha]_D^{23.2} = -8.80^\circ$  ( $c = 1.00$ , CHCl<sub>3</sub>);  $R_f$  0.24 (2:1 hexanes:EtOAc). Chiral SFC: 250 mm CHIRALPAK AD–3, 15% *i*-PrOH, 3.5 mL/min,  $\lambda = 216$  nm, 35 °C, nozzle pressure = 100 bar CO<sub>2</sub>,  $t_{R1}$  (minor) = 6.0 min,  $t_{R2}$  (major) = 7.2 min. The spectral data match those previously reported in the literature for *rac*-**28**.<sup>22</sup> The major enantiomer product was assigned by comparison to the  $[\alpha]_D$  and Chiral SFC retention time values obtained for (**S**)-**28** as described in Section Gii of the Experimental Procedures.

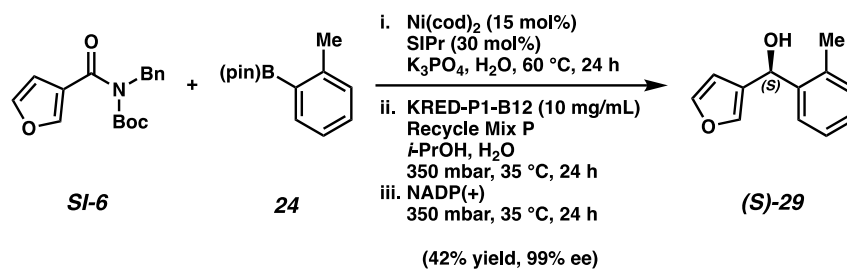

**Alcohol (S)-29:** Followed representative procedure A. Purification by preparative TLC (plate neutralized with a 2% Et<sub>3</sub>N in hexanes solution prior to loading crude material; 9:1 hexanes:EtOAc) yielded alcohol (S)-29 (42% yield, average of two experiments, 99% ee) as a colorless oil. Alcohol (S)-29:  $[\alpha]_D^{26.8} = +8.00^\circ$  ( $c = 0.100$ , CHCl<sub>3</sub>);  $R_f$  0.31 (4:1 hexanes:EtOAc); <sup>1</sup>H NMR (500 MHz, CDCl<sub>3</sub>): 7.54 (dd,  $J = 7.5, 1.3$ , 1H), 7.37 (t,  $J = 1.70$ , 1H), 7.25–7.19 (overlap, 3H), 7.17–7.13 (m, 1H), 6.34 (dd,  $J = 1.9, 0.76$ , 1H), 5.97 (d,  $J = 3.8$ , 1H), 2.30 (s, 3H), 2.01 (d,  $J = 4.25$ , 1H); <sup>13</sup>C NMR (125 MHz, CDCl<sub>3</sub>):  $\delta$  143.6, 141.1, 140.3, 135.1, 130.7, 128.3, 127.8, 126.4, 125.8, 109.6, 66.5, 19.2; IR (film): 3359, 2958, 2926, 2854, 1664, 1501, 1157 cm<sup>-1</sup>; HRMS-APCI ( $m/z$ ) [M]<sup>+</sup> calcd for C<sub>12</sub>H<sub>12</sub>O<sub>2</sub><sup>+</sup>, 188.0831; found 188.0824. Chiral SFC: 250 mm CHIRALPAK AD–H, 5% *i*-PrOH, 3.5 mL/min,  $\lambda = 210$  nm, 40 °C, nozzle pressure = 100 bar CO<sub>2</sub>,  $t_{R1}$  (major) = 8.2 min,  $t_{R2}$  (minor) = 9.8 min. The major enantiomer product was assigned by analogy to the proposed selectivity model outlined in Figure 4B.

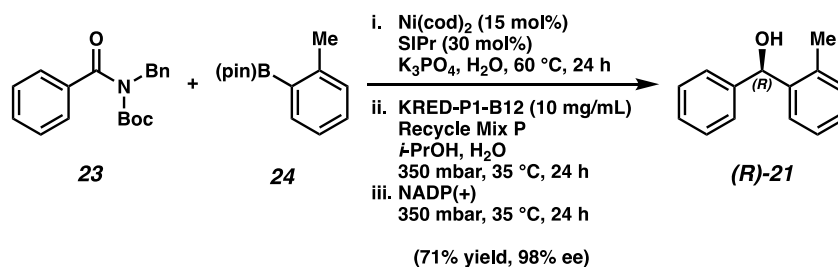

**Alcohol (R)-21:** Followed representative procedure A. Purification by preparative TLC (plate neutralized with a 2% Et<sub>3</sub>N in hexanes solution prior to loading crude material; 17:2:1 hexanes:benzene:Et<sub>2</sub>O) yielded alcohol (R)-21 (71% yield, average of two experiments, 98% ee) as a white solid. Alcohol (R)-21:  $[\alpha]_D^{24.3} = -5.67^\circ$  ( $c = 1.00$ , CHCl<sub>3</sub>);  $R_f = 0.31$  (5:1 hexanes:EtOAc). Chiral SFC: 250 mm CHIRALPAK IC–3, 5% *i*-PrOH, 3.5 mL/min,  $\lambda = 216$  nm, 35 °C, nozzle pressure = 100 bar CO<sub>2</sub>,  $t_{R1}$  (minor) = 8.4 min,  $t_{R2}$  (major) = 9.3 min. The spectral

data match those previously reported in the literature for (*R*)-**21**.<sup>15</sup> The major enantiomer product was assigned by comparison to published  $[\alpha]_D$  values for (*R*)-**21**.<sup>16</sup>

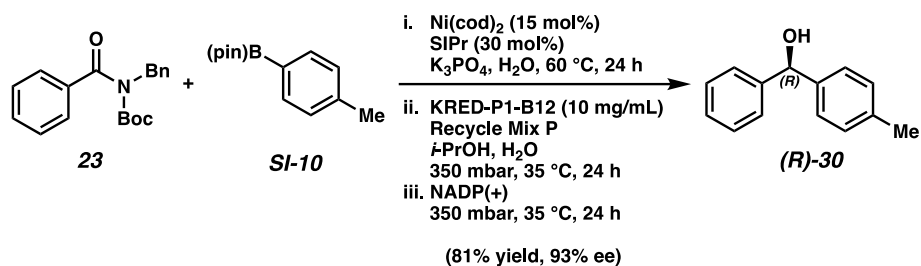

**Alcohol (*R*)-30:** Followed representative procedure A. Purification by preparative TLC (plate neutralized with a 2% Et<sub>3</sub>N in hexanes solution prior to loading crude material; 17:2:1 hexanes:benzene:Et<sub>2</sub>O) yielded alcohol (*R*)-**30** (81% yield, average of two experiments, 93% ee) as a white solid. Alcohol (*R*)-**30**:  $[\alpha]_D^{23.3} = +8.60^\circ$  ( $c = 1.00$ , CHCl<sub>3</sub>);  $R_f = 0.41$  (5:1 hexanes:EtOAc). Chiral SFC: 250 mm CHIRALPAK AD-3, 5% MeOH, 3.5 mL/min,  $\lambda = 216$  nm, 35 °C, nozzle pressure = 100 bar CO<sub>2</sub>,  $t_{R1}$  (minor) = 9.5 min,  $t_{R2}$  (major) = 10.1 min. The spectral data match those previously reported in the literature for (*R*)-**30**.<sup>17</sup> The major enantiomer product was assigned by comparison to published  $[\alpha]_D$  values for (*R*)-**30**.<sup>17</sup>

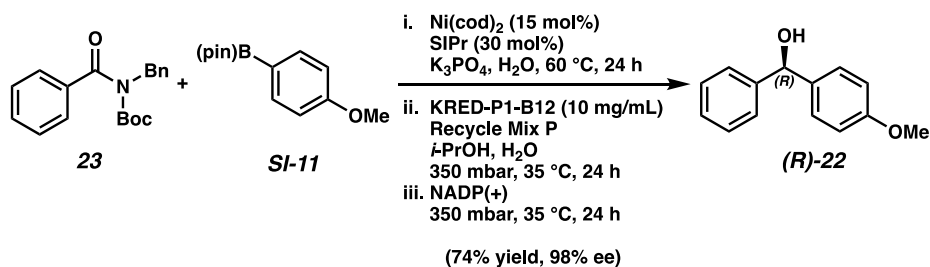

**Alcohol (*R*)-22:** Followed representative procedure A. Purification by preparative TLC (plate neutralized with a 2% Et<sub>3</sub>N in hexanes solution prior to loading crude material; 12:2:1 hexanes:benzene:Et<sub>2</sub>O) yielded alcohol (*R*)-**22** (74% yield, average of two experiments, 98% ee) as a white solid. Alcohol (*R*)-**22**:  $[\alpha]_D^{27.2} = +14.40^\circ$  ( $c = 1.00$ , CHCl<sub>3</sub>);  $R_f = 0.18$  (5:1 hexanes:EtOAc). Chiral SFC: 250 mm CHIRALPAK IA-3, 5% *i*-PrOH, 3.5 mL/min,  $\lambda = 216$  nm, 35 °C, nozzle pressure = 100 bar CO<sub>2</sub>,  $t_{R1}$  (major) = 17.7 min,  $t_{R2}$  (minor) = 19.3 min. The spectral data match those previously reported in the literature for (*S*)-**22**.<sup>17</sup> The major enantiomer product was assigned by comparison to published  $[\alpha]_D$  values for (*R*)-**22**.<sup>17</sup>

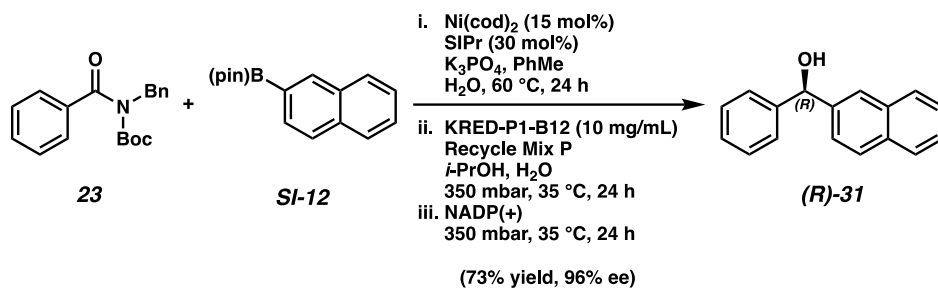

**Alcohol (R)-31:** Followed representative procedure B. Purification by preparative TLC (plate neutralized with a 2%  $\text{Et}_3\text{N}$  in hexanes solution prior to loading crude material; 17:2:1 hexanes:benzene: $\text{Et}_2\text{O}$ , eluted twice) yielded alcohol (**R**)-31 (73% yield, average of two experiments, 96% ee) as a white solid. Alcohol (**R**)-31:  $[\alpha]_{\text{D}}^{25.2} = +4.50^\circ$  ( $c = 1.00$ ,  $\text{C}_6\text{H}_6$ );  $R_f$  0.26 (5:1 hexanes: $\text{EtOAc}$ ). Chiral SFC: 250 mm CHIRALPAK IB–H, 20% *i*-PrOH, 3.5 mL/min,  $\lambda = 210$  nm, 40 °C, nozzle pressure = 100 bar  $\text{CO}_2$ ,  $t_{\text{R}1}$  (minor) = 4.1 min,  $t_{\text{R}2}$  (minor) = 4.7 min. The spectral data match those previously reported in the literature for (**R**)-31.<sup>23</sup> The major enantiomer product was assigned by comparison to published  $[\alpha]_{\text{D}}$  values for (**R**)-31.<sup>24</sup>

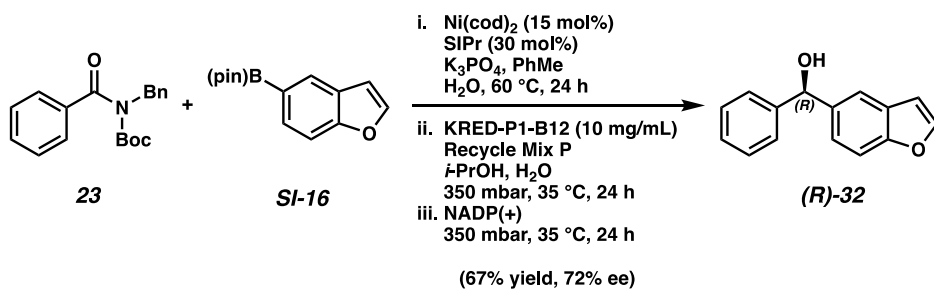

**Alcohol (R)-32:** Followed representative procedure B. Purification by preparative TLC (plate neutralized with a 2%  $\text{Et}_3\text{N}$  in hexanes solution prior to loading crude material; 17:2:1 hexanes:benzene: $\text{Et}_2\text{O}$ , eluted twice) yielded alcohol (**R**)-32 (67% yield, average of two experiments, 72% ee) as a clear oil. Alcohol (**R**)-32: m.p. 67–70 °C  $[\alpha]_{\text{D}}^{24.3} = +3.81^\circ$  ( $c = 0.7$ ,  $\text{C}_6\text{H}_6$ );  $R_f$  0.21 (5:1 hexanes: $\text{EtOAc}$ );  $^1\text{H}$  NMR (500 MHz,  $\text{CDCl}_3$ ): 7.64–7.61 (m, 2H), 7.47–7.44 (m, 1H), 7.43–7.40 (m, 2H), 7.36–7.32 (m, 2H), 7.31 (dd,  $J = 8.5, 1.9$ , 1H), 7.29–7.25 (m, 1H), 6.74 (dd,  $J = 2.3, 0.97$ , 1H), 5.97 (d,  $J = 2.1$ , 1H), 2.24 (d,  $J = 3.2$ , 1H);  $^{13}\text{C}$  NMR (125 MHz,  $\text{CDCl}_3$ ): (12 of 13 observed)  $\delta$  154.4, 145.5, 144.1, 138.7, 128.5, 127.5, 126.5, 123.3, 119.3, 111.4, 106.7, 76.4; IR (film): 3352, 3028, 1467, 1451, 1262, 1031  $\text{cm}^{-1}$ ; HRMS-APCI ( $m/z$ )  $[\text{M}+\text{H}]^+$

calcd for C<sub>15</sub>H<sub>13</sub>O<sub>2</sub><sup>+</sup>, 225.0910; found 225.0907. Chiral SFC: 250 mm CHIRALPAK OJ–H, 15% *i*-PrOH, 3.5 mL/min, λ = 210 nm, 40 °C, nozzle pressure = 100 bar CO<sub>2</sub>, t<sub>R1</sub> (major) = 7.5 min, t<sub>R2</sub> (minor) = 8.7 min. The major enantiomer product was assigned by analogy to the selectivity model outlined in Figure 4B.

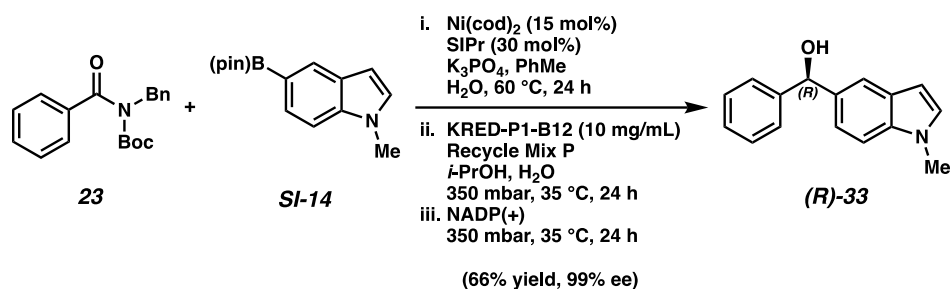

**Alcohol (R)-33:** Followed representative procedure B. Purification by preparative thin layer chromatography (plate neutralized with a 2% Et<sub>3</sub>N in hexanes solution prior to loading crude material; 7:2:1 hexanes:benzene:Et<sub>2</sub>O) yielded alcohol (R)-33 (66% yield, average of two experiments, 99% ee) as an off-white solid. Alcohol (R)-33: [α]<sub>D</sub><sup>27.1</sup> = +26.40° (*c* = 1.00, CHCl<sub>3</sub>); R<sub>f</sub> 0.15 (5:1 hexanes:EtOAc). Chiral SFC: 250 mm CHIRALPAK AS–H, 20% *i*-PrOH, 3.5 mL/min, λ = 216 nm, 35 °C, nozzle pressure = 100 bar CO<sub>2</sub>, t<sub>R1</sub> (major) = 2.9 min, t<sub>R2</sub> (minor) = 3.3 min. The spectral data match those obtained for *rac*-33 as described in Section Gi of the Experimental Procedures. The major enantiomer product was assigned by comparison to the [α]<sub>D</sub> and Chiral SFC retention time values obtained for (R)-33 as described in Section Gii of the Experimental Procedures.

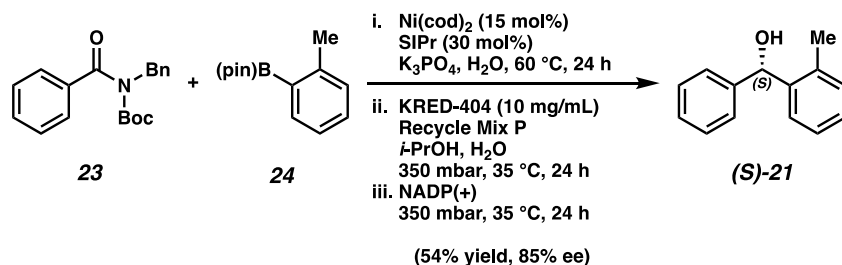

**Alcohol (S)-21:** Followed representative procedure A using KRED-404 in place of KRED-P1-B12. Purification by preparative TLC (plate neutralized with a 2% Et<sub>3</sub>N in hexanes solution prior to loading crude material; 17:2:1 hexanes:benzene:Et<sub>2</sub>O) yielded alcohol (S)-21 (54% yield,

average of two experiments, 85% ee) as a white solid. Alcohol (*S*)-**21**:  $[\alpha]_D^{23.0} = +6.31^\circ$  ( $c = 1.00$ ,  $\text{CHCl}_3$ );  $R_f$  0.31 (5:1 hexanes:EtOAc). Chiral SFC: 250 mm CHIRALPAK IC-3, 5% *i*-PrOH, 3.5 mL/min,  $\lambda = 216$  nm, 35 °C, nozzle pressure = 100 bar  $\text{CO}_2$ ,  $t_{R1}$  (major) = 8.8 min,  $t_{R2}$  (minor) = 9.9 min. The spectral data match those previously reported in the literature for (*R*)-**21**.<sup>15</sup> The major enantiomer product was assigned by comparison to published  $[\alpha]_D$  values for (*S*)-**21**.<sup>16</sup>

## G. Verification of Enantiopurity

### i. Preparation of Racemic Alcohols

Note: Alcohols *rac*-**21** and *rac*-**22** were obtained commercially (see Materials and Methods). Supplementary information for the syntheses of ketones **SI-17**<sup>25</sup> and **SI-18**<sup>26</sup> as well as alcohols *rac*-**25**<sup>27</sup> *rac*-**26**,<sup>28</sup> *rac*-**27**,<sup>20</sup> *rac*-**28**,<sup>22</sup> *rac*-**30**,<sup>27</sup> and *rac*-**31**<sup>29</sup> have been published and spectral data match those previously reported.

**Procedures for the synthesis of *rac*-**29**, *rac*-**32**, and *rac*-**33** used for SFC assay development.**

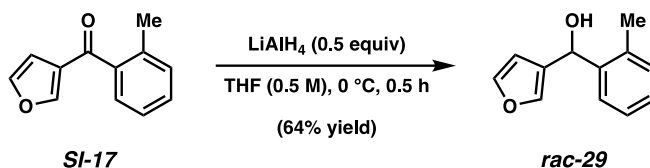

**Alcohol *rac*-**29**.** A 1-dram vial equipped with a magnetic stir bar was flame-dried under reduced pressure and then allowed to cool under  $\text{N}_2$ . To the vial was added ketone **SI-17** (5.30 mg, 28.5  $\mu\text{mol}$ , 1.0 equiv) and THF (0.055 mL, 0.4 M). The resultant solution was cooled to 0 °C and stirring began. At 0 °C,  $\text{LiAlH}_4$  (14.2  $\mu\text{L}$ , 14.2  $\mu\text{mol}$ , 0.5 equiv, 1.0 M in THF) was added dropwise across 1 min and the reaction was left to stir at this temperature for 0.5 h.

The reaction was quenched at 0 °C with deionized  $\text{H}_2\text{O}$  (1.0 mL) and subsequently warmed to 23 °C. The reaction mixture was then extracted with  $\text{CH}_2\text{Cl}_2$  (3 x 1 mL) and the combined organic layers were dried over  $\text{Na}_2\text{SO}_4$ , filtered, and the volatiles were removed under reduced pressure.

The crude material was purified by preparative TLC (4:1 hexanes:EtOAc) to generate alcohol *rac*-**29** (3.4 mg, 64% yield) as a clear oil. The spectral data match those obtained for (*S*)-

**29** as described in section F. Chiral SFC: 250 mm CHIRALPAK AD–H, 5% *i*-PrOH, 3.5 mL/min,  $\lambda = 210$  nm, 40 °C, nozzle pressure = 100 bar CO<sub>2</sub>,  $t_{R1} = 9.8$  min,  $t_{R2} = 8.3$  min.

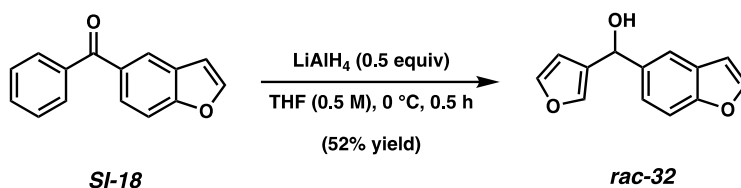

**Alcohol *rac*-32.** A 1-dram vial equipped with a magnetic stir bar was flame-dried under reduced pressure and then allowed to cool under N<sub>2</sub>. To the vial was added ketone **SI-18** (6.10 mg, 27.4  $\mu$ mol, 1.0 equiv) and THF (0.055 mL, 0.4 M). The resultant solution was cooled to 0 °C and stirring began. At 0 °C, LiAlH<sub>4</sub> (13.7  $\mu$ L, 13.7  $\mu$ mol, 0.5 equiv, 1.0 M in THF) was added dropwise across 1 min and the reaction was left to stir at this temperature for 0.5 h.

The reaction was quenched at 0 °C with deionized H<sub>2</sub>O (1.0 mL) and subsequently warmed to 23 °C. The reaction mixture was then extracted with CH<sub>2</sub>Cl<sub>2</sub> (3 x 1 mL) and the combined organic layers were dried over Na<sub>2</sub>SO<sub>4</sub>, filtered, and the volatiles were removed under reduced pressure.

The crude material was purified by preparative TLC (4:1 hexanes:EtOAc) to generate alcohol ***rac*-32** (3.2 mg, 52% yield) as a clear oil. The spectral data match those obtained for (*S*)-**32** as described in section F. Chiral SFC: 250 mm CHIRALPAK OJ–H, 15% *i*-PrOH, 3.5 mL/min,  $\lambda = 210$  nm, 40 °C, nozzle pressure = 100 bar CO<sub>2</sub>,  $t_{R1} = 8.6$  min,  $t_{R2} = 7.5$  min.

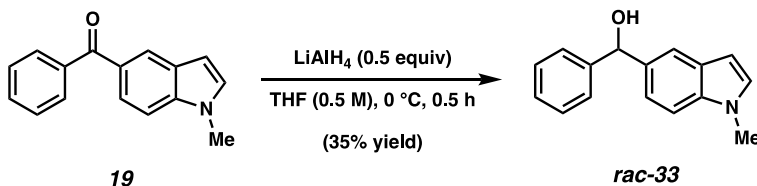

**Alcohol *rac*-33.** A 1-dram vial equipped with a magnetic stir bar was flame-dried under reduced pressure and then allowed to cool under N<sub>2</sub>. To the vial was added ketone **19** (20.0 mg, 85.0  $\mu$ mol, 1.0 equiv) and THF (0.20 mL, 0.4 M). The resultant solution was cooled to 0 °C and stirring began. At 0 °C, LiAlH<sub>4</sub> (42.5  $\mu$ L, 42.5  $\mu$ mol, 0.5 equiv, 1.0 M in THF) was added dropwise across 1 min and the reaction was left to stir at this temperature for 0.5 h.



The reaction was quenched at 0 °C with deionized H<sub>2</sub>O (1.0 mL) and subsequently warmed to 23 °C. The reaction mixture was then extracted with CH<sub>2</sub>Cl<sub>2</sub> (3 x 1 mL) and the combined organic layers were dried over Na<sub>2</sub>SO<sub>4</sub>, filtered, and the volatiles were removed under reduced pressure.

The crude material was purified by preparative TLC (4:1 hexanes:EtOAc) to generate alcohol **rac-33** (7.1 mg, 35% yield) as a white film. Alcohol **rac-33**: R<sub>f</sub> 0.21 (2:1 hexanes:EtOAc); <sup>1</sup>H NMR (500 MHz, CDCl<sub>3</sub>): δ 7.64–7.62 (m, 1H), 7.45–7.41 (m, 2H), 7.35–7.30 (m, 2H), 7.30–7.27 (m, 1H), 7.25–7.20 (m, 2H), 7.05 (d, *J* = 3.2, 1H), 6.46 (dd, *J* = 3.1, 0.8, 1H), 5.98 (d, *J* = 3.4, 1H), 3.78 (s, 3H), 2.18 (d, *J* = 3.6, 1H); <sup>13</sup>C NMR (125 MHz, CDCl<sub>3</sub>): δ 144.7, 136.4, 135.4, 129.5, 128.5, 128.4, 127.3, 126.6, 120.9, 119.3, 109.6, 101.3, 77.0, 33.1; IR (film): 3380, 3027, 2924, 1603, 1512, 1492, 1450 cm<sup>-1</sup>; HRMS-APCI (*m/z*) [M+H]<sup>+</sup> calcd for C<sub>16</sub>H<sub>16</sub>NO<sup>+</sup>, 238.1226; found 238.1226. Chiral SFC: 250 mm CHIRALPAK AS–H, 20% *i*-PrOH, 3.5 mL/min, λ = 216 nm, 35 °C, nozzle pressure = 100 bar CO<sub>2</sub>, t<sub>R1</sub> = 2.9 min, t<sub>R2</sub> = 3.2 min.

## ii. Enantioselective Diarylmethanol Synthesis by Asymmetric Arylation.

Note: Enantioenriched diarylmethanol products synthesized in this report for which [α]<sub>D</sub> values have not been previously disclosed were synthesized via asymmetric arylation to facilitate stereochemical assignments.<sup>30</sup> For the conditions outlined below, originally reported by Braga<sup>31</sup> and modified by Jarvo,<sup>32</sup> arylation occurs from the *re* face of the prochiral aldehyde substrate.

### Synthesis of the (*S*)-(1-tritylaziridin-2-yl)diphenylmethanol ligand **SI-19**.

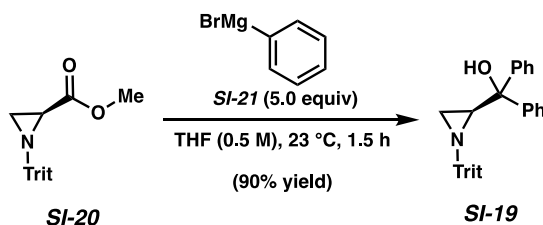

**Ligand SI-19:** A scintillation vial equipped with a magnetic stir bar was flame-dried under reduced pressure and then allowed to cool under N<sub>2</sub>. To the vial was added (*S*)-methyl-1-tritylaziridine-2-carboxylate (**SI-20**, 150 mg, 0.437 mmol, 1.0 equiv) and the vial was flushed with N<sub>2</sub> for 5 min. THF (0.87 mL, 0.5 M) was then added and the mixture was stirred at 23 °C until homogeneous. Then, phenylmagnesium bromide (**SI-21**, 2.18 mL, 2.18 mmol, 5.0 equiv, 1.0 M in

THF) was added dropwise across 10 min and the solution was stirred at 23 °C for 1.5 h.

The reaction was quenched by the addition of sat. aq. NH<sub>4</sub>Cl (6 mL) and the layers were separated. The aqueous layer was extracted with Et<sub>2</sub>O (3 x 6 mL) and the combined organic layers were dried over Na<sub>2</sub>SO<sub>4</sub>, filtered, and the volatiles were removed under reduced pressure. The crude material was purified by flash chromatography (49:1 hexanes:EtOAc w/ 1% Et<sub>3</sub>N) to yield ligand **SI-19** (182.8 mg, 90% yield) as a white foam. Ligand **SI-19**: [ $\alpha$ ]<sub>D</sub><sup>22.9</sup> = -80.8° (c = 1.00, CHCl<sub>3</sub>); R<sub>f</sub> 0.60 (5:1 hexanes:EtOAc); The spectral data match those previously reported in the literature.<sup>31</sup>

### Representative Procedure for asymmetric arylation (synthesis of (*S*)-**28** used as an example).

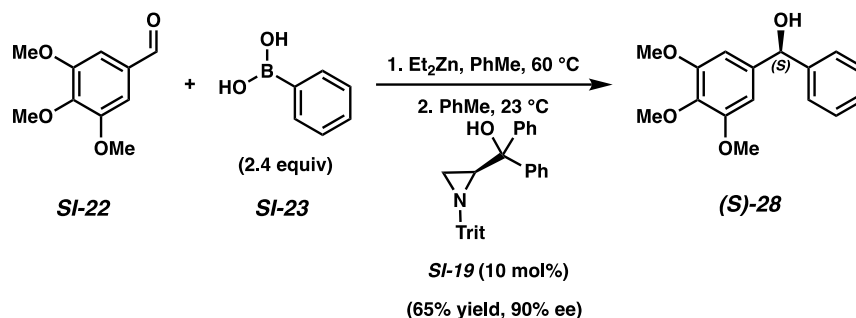

**Alcohol (*S*)-**28**:** A scintillation vial equipped with a magnetic stir bar was flame-dried under reduced pressure and then allowed to cool under N<sub>2</sub>. To the vial was added phenylboronic acid (**SI-23**, 146.3 mg, 1.20 mmol, 2.4 equiv) and the vial was flushed with N<sub>2</sub> for 5 min before being taken into a glove box. In the glove box, toluene (2.50 mL) was added and the mixture was briefly stirred at 23 °C. ZnEt<sub>2</sub> (3.18 mL, 3.50 mmol, 7.0 equiv, 1.1 M in toluene) was then added and the septum cap was replaced with a Teflon-lined plastic screw cap. The vial was removed from the glove box, sealed with Teflon tape, and stirred at 60 °C for 12 h. The reaction was then removed from heat and cooled to 23 °C. Ligand **SI-19** (1.25 mL, 0.05 mmol, 0.1 equiv, 0.04 M in toluene) was then added and the reaction mixture was stirred at 23 °C for 10 min. Subsequently, 3,4,5-trimethoxybenzaldehyde (**SI-22**, 1.25 mL, 0.5 mmol, 1.0 equiv, 0.4 M in toluene) was added to the vial and the resultant solution was stirred at 23 °C for 3 h.

The reaction was neutralized by careful addition of 1.0 M HCl (~2.0 mL) at 23 °C, monitored by pH paper. The crude reaction mixture was then transferred to a separatory funnel

with deionized H<sub>2</sub>O (20 mL), brine (10 mL), and EtOAc (30 mL). The layers were allowed to separate and the aqueous layer was extracted with EtOAc (2 x 30 mL). The combined organic layers were washed with brine (30 mL), dried over Na<sub>2</sub>SO<sub>4</sub>, filtered, and the volatiles were removed under reduced pressure.

The crude material was purified by three sequential flash chromatography columns (4:1 → 2:1 hexanes:EtOAc; 5:1:1 hexanes:benzene:Et<sub>2</sub>O; 2:1:1 hexanes:CH<sub>2</sub>Cl<sub>2</sub>:Et<sub>2</sub>O) to yield (*S*)-**28** (89.0 mg, 65% yield, 90% ee) as a white solid. Alcohol (*S*)-**28**:  $[\alpha]_D^{24.8} = +5.60^\circ$  ( $c = 1.00$ , CHCl<sub>3</sub>);  $R_f$  0.24 (2:1 hexanes:EtOAc). Chiral SFC: 250 mm CHIRALPAK AD-3, 15% *i*-PrOH, 3.5 mL/min,  $\lambda = 216$  nm, 35 °C, nozzle pressure = 100 bar CO<sub>2</sub>,  $t_{R1}$  (major) = 6.1 min,  $t_{R2}$  (minor) = 7.3 min. The spectral data match those previously reported in the literature for *rac*-**28**.<sup>22</sup>

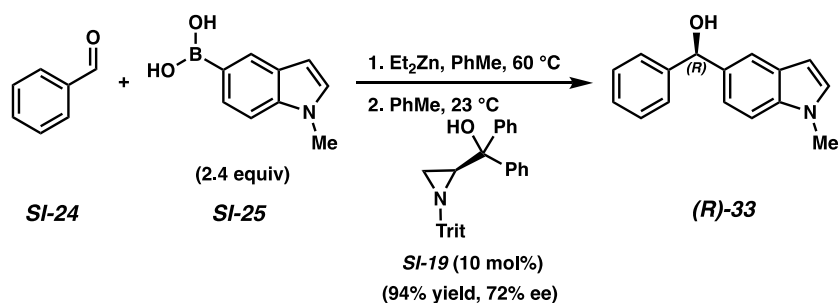

**Alcohol (R)-33**: Followed the representative procedure. Purification by flash chromatography (8:1 hexanes:EtOAc) yielded alcohol (*R*)-**33** (111.5 mg, 94% yield, 72% ee) as an off-white solid. Alcohol (*R*)-**33**:  $[\alpha]_D^{22.8} = +28.40^\circ$  ( $c = 1.00$ , CHCl<sub>3</sub>);  $R_f$  0.15 (5:1 hexanes:EtOAc). Chiral SFC: 250 mm CHIRALPAK AS-H, 20% *i*-PrOH, 3.5 mL/min,  $\lambda = 216$  nm, 35 °C, nozzle pressure = 100 bar CO<sub>2</sub>,  $t_{R1}$  (major) = 2.9 min,  $t_{R2}$  (minor) = 3.3 min. The spectral data match those obtained for *rac*-**33** as described in Section Gi of the Experimental Procedures.

## Part II: Bioinformatics Section

### Computational Modelling of the Ketone in the Active Site of the Enzyme (Figure 4)

The 1ZK4.pdb crystal structure was used as the starting template for the structural analysis. The structure was prepared by adding missing atoms such as hydrogens using the Amber 14 force field as implemented in MOE from the chemical computing group.<sup>33</sup> Computational design methods were used to replace amino acids that differed between the 1ZK4 crystal structure and those from either KRED-404 or P1-B12 using Rosetta.<sup>34</sup> The acetophenone bound in the active site of the 1ZK4 crystal structure was used to guide the placement of ketone **14**. After placement of the ketone the system was minimized using MOE in order to obtain an optimal conformation of the ketone relative to amino acids around the substrate binding pocket and the cofactor.

### Sequence Alignments

*Supplementary Table 4.* KRED P1-B12 and KRED 404 active site sequence mutations relative to WT enzyme.

| Position | Wild-Type | P1-B12 † | KRED-404 † |
|----------|-----------|----------|------------|
| 94       | A         | D        | A          |
| 96       | S         | V        | S          |
| 145      | E         | F        | A          |
| 153      | L         | V        | L          |
| 190      | Y         | P        | G          |
| 202      | A         | A        | F          |
| 206      | M         | W        | C          |
| 249      | Y         | W        | Y          |

† Mutation relative to the wild-type enzyme in and around the active site are shown in red.

*Supplementary Table 5.* KRED 402 and KRED 404 sequence mutations relative to WT enzyme.

| Position | KRED-402 † | KRED-404 † |
|----------|------------|------------|
| 16       | T          | S          |
| 76       | I          | T          |
| 190      | C          | G          |
| 196      | V          | I          |

† Mutation around the active site are shown in red.

## Supplementary References

- <sup>1</sup> Johnson II, D. C. & Widlanski, T. S. A reversible safety-catch method for the hydrogenolysis of *N*-benzyl moieties. *Tetrahedron Lett.* **45**, 8483–8487 (2004).
- <sup>2</sup> Weires, N. A., Baker, E. L. & Garg, N. K. Nickel-catalysed Suzuki–Miyaura coupling of amides. *Nat. Chem.* **8**, 75–79 (2016).
- <sup>3</sup> Baker, E. L., Yamano, M. M., Zhou, Y., Anthony, S. M. & Garg, N. K. A two-step approach to achieve secondary amide transamidation enabled by nickel catalysis. *Nat. Commun.* **7**, 11154 (2016).
- <sup>4</sup> Meng, L., Su, J., Zhang, L., Zhang, Z. & Wang, Z. Direct electrosynthesis of ketones from benzylic methylenes by electrooxidative C–H activation. *Chem. Eur. J.* **19**, 5542–5545 (2013).
- <sup>5</sup> Gunasekaran, S. & Venkatasubramanian, N. Oxidation of diphenylmethanol by bromamine T. A kinetic and mechanistic study. *J. Chem. Soc., Perkin Trans. 2.* **0**, 949–953 (1983).
- <sup>6</sup> Xin, B., Zhang, Y. & Cheng, K. Phosphine-free cross-coupling reaction of arylboronic acids with carboxylic anhydrides or acyl chlorides in aqueous media. *J. Org. Chem.* **71**, 5725–5731 (2006).
- <sup>7</sup> Posternak, A. G., Garlyauskayte, R. Y. & Yagupolskii, L. M. A novel Brønsted acid catalyst for Friedel–Crafts acylation. *Tetrahedron Lett.* **50**, 446–447 (2009).
- <sup>8</sup> Kuang, Y. & Wang, Y. Dirhodium(II)-catalyzed cross-coupling reactions of aryl aldehydes with arylboronic acids in water. *Eur. J. Org. Chem.* **6**, 1163–1166 (2014).
- <sup>9</sup> Schmink, J. R. & Krska, S. W. Reversed-polarity synthesis of diaryl ketones via Palladium-catalyzed cross-coupling of acylsilanes. *J. Am. Chem. Soc.* **133**, 19574–19577 (2011).
- <sup>10</sup> Meng, G., Szostak, R. & Szostak, M. *N*-Methylamino pyrimidyl amides (MAPA): highly reactive, electronically-activated amides in catalytic N–C(O) cleavage. *Org. Lett.* **19**, 4656–4659 (2017).
- <sup>11</sup> Yamamoto, T., Ishibashi, A. & Suginome, M. Regioselective synthesis of *o*-benzenediboronic acids via Ir-catalyzed *o*-C–H borylation directed by a pyrazolylaniline-modified boronyl group. *Org. Lett.* **19**, 886–889 (2017).
- <sup>12</sup> Collet, F., Song, B., Rudolphi, F. & Goossen, L. J. Development of decarboxylative coupling processes for the synthesis of azomethines and ketones. *Eur. J. Org. Chem.* **32**, 6486–6501 (2011).
- <sup>13</sup> Halima, T. B., Zhang, W., Yalaoui, I., Hong, X., Yang, Y.-F., Houk, K. N. & Newman, S. G. Palladium-catalyzed Suzuki–Miyaura coupling of aryl esters. *J. Am. Chem. Soc.* **139**, 1311–1318 (2017).
- <sup>14</sup> Huan, P.-Q. & Chena, H. Ni-Catalyzed cross-coupling reactions of *N*-acylpyrrole-type amides with organoboron reagents. *Chem. Commun.* **53**, 12584–12587 (2017).
- <sup>15</sup> Yamamoto, K., Tsurumi, K., Sakurai, F., Kondo, K. & Aoyama, T. Development of asymmetric nickel-catalyzed arylation of aromatic aldehydes with arylboron reagents. *Synthesis* **22**, 3585–3590 (2008).
- <sup>16</sup> Watanabe, M., Kuwahara, S., Harada, N., Koizumi, M. & Ohkuma, T. Enantioresolution by the chiral phthalic acid method: absolute configurations of (2-methylphenyl)phenylmethanol and related compounds. *Tetrahedron: Asymmetry* **10**, 2075–2078 (1999).
- <sup>17</sup> Lee, T., Wilson, T. W., Berg, R., Ryberg, P. & Hartwig, J. F. Rhodium-catalyzed enantioselective silylation of arene C–H bonds: desymmetrization of diarylmethanols. *J. Am. Chem. Soc.* **137**, 6742–6745 (2015).
- <sup>18</sup> Fontes, M., Verdaguer, X., Solà, L., Pericàs, M. A. & Riera, A. 2-Piperidino-1,1,2-triphenylethanol: a highly effective catalyst for the enantioselective arylation of aldehydes. *J. Org. Chem.* **69**, 2532–2543 (2004).

- <sup>19</sup> Chang, S.-J., Zhou, S. & Gau, H.-M. Enantioselective addition of  $\text{ArTi}(\text{O}i\text{-Pr})_3$  to aldehydes catalyzed by a titanium complex of an *N*-sulfonylated amino alcohol. *RSC Adv.* **5**, 9368–9373 (2015).
- <sup>20</sup> Lee, C.-T. & Lipshutz, B. H. Nonracemic diarylmethanols from CuH-catalyzed hydrosilylation of diaryl ketones. *Org. Lett.* **10**, 4187–4190 (2008).
- <sup>21</sup> Naito, J., Kosaka, M., Sugito, T., Watanabe, M., Harada, N. & Pirkle, W. H. Enantioresolution of fluorinated diphenylmethanols and determination of their absolute configurations by X-ray crystallographic and  $^1\text{H}$  NMR anisotropy methods. *Chirality* **16**, 22–35 (2004).
- <sup>22</sup> Tanpure, R. P., Harkrider, A. R., Strecker, T. E., Hamel, E., Trawick, M. L. & Pinney, K. G. Application of the McMurry coupling reaction in the synthesis of tri- and tetra-arylethylene analogues as potential cancer chemotherapeutic agents. *Bioorg. Med. Chem.* **17**, 6993–7001 (2009).
- <sup>23</sup> Zhou, S., Wu, K.-H., Chen, C.-A. & Gau, H.-M. Highly enantioselective arylation of aldehydes and ketones using  $\text{AlArEt}_2(\text{THF})$  as aryl sources. *J. Org. Chem.* **74**, 3500–3505 (2009).
- <sup>24</sup> Jagt, R. B. C., Toullec, P. Y., de Vries, J. G., Feringa, B. L. & Minnaard, A. J. Rhodium/phosphoramidite-catalyzed asymmetric arylation of aldehydes with arylboronic acids. *Org. Biomol. Chem.* **4**, 773–775 (2006).
- <sup>25</sup> Moon, S.-Y., Jung, S.-H., Kim, U. B. & Kim, W.-S. Synthesis of Ketones via organolithium addition to acid chlorides using continuous flow chemistry. *RSC Adv.* **5**, 79385–79390 (2015).
- <sup>26</sup> Ziegler, D. S., Karaghiosoff, K. & Knochel, P. Generation of aryl and heteroaryl magnesium reagents in toluene by Br/Mg or Cl/Mg exchange. *Angew. Chem., Int. Ed.* **57**, 6701–6704 (2018).
- <sup>27</sup> Yamamoto, T., Ohta, T. & Ito, Y. Palladium-catalyzed addition of arylboronic acids to aldehydes. *Org. Lett.* **7**, 4153–4155 (2005).
- <sup>28</sup> Jia, X., Fang, L., Lin, A., Pan, Y. & Zhu, C. Highly efficient and facile aryl transfer to aldehydes using  $\text{ArB}(\text{OH})_2\text{-GaMe}_3$ . *Synlett* **3**, 495–499 (2009).
- <sup>29</sup> Kuriyama, M., Shimazawa, R., Enomoto, T., Shirai, T. Palladium-catalyzed 1,2-addition of potassium aryl- and alkyenyltrifluoroborates to aldehydes using thioether–imidazolium carbene ligands. *J. Org. Chem.* **73**, 6939–6942 (2008).
- <sup>30</sup> Schmidt, F., Stemmler, R. T., Rudolph, J. & Bolm, C. Catalytic asymmetric approaches towards enantiomerically enriched diarylmethanols and diarylmethylamines. *Chem. Soc. Rev.* **35**, 454–470 (2006).
- <sup>31</sup> Braga, A. L., Paixão, M. W., Westermann, B., Schneider, P. H. & Wessjohann, L. A. Acceleration of arylzinc formation and its enantioselective addition to aldehydes by microwave irradiation and aziridine-2-methanol catalysts. *J. Org. Chem.* **73**, 2879–2882 (2008).
- <sup>32</sup> Greene, M. A., Yonova, I. M., Williams, F. J. & Jarvo, E. R. Traceless directing group for stereospecific nickel-catalyzed alkyl–alkyl cross-coupling reactions. *Org. Lett.* **14**, 4293–4296 (2012).
- <sup>33</sup> *Molecular Operating Environment* (MOE), 2013.08; Chemical Computing Group ULC, 1010 Sherbooke St. West, Suite #910, Montreal, QC, Canada, H3A 2R7 (2018).
- <sup>34</sup> Kuhlman, B., Dantas, G., Ireton, G. C., Varani, G., Stoddard, B. L. & Baker, D. Design of a novel globular protein fold with atomic-level accuracy. *Science* **302**, 1364–1368 (2003).

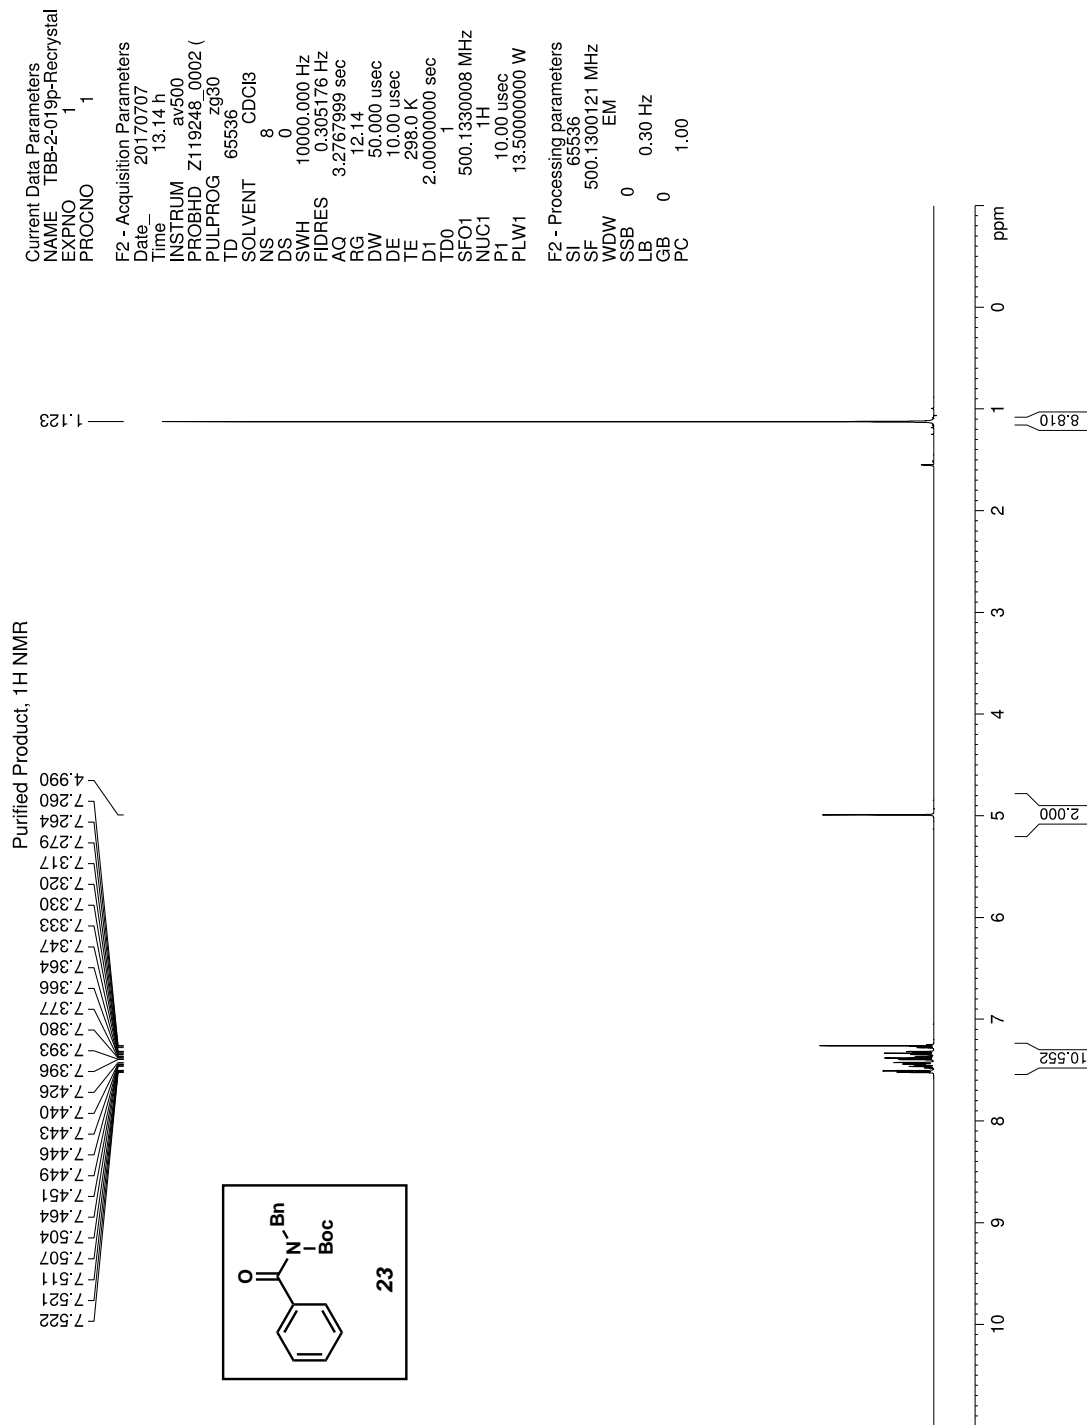

Supplementary Figure 2. <sup>1</sup>H NMR spectrum for compound 23.

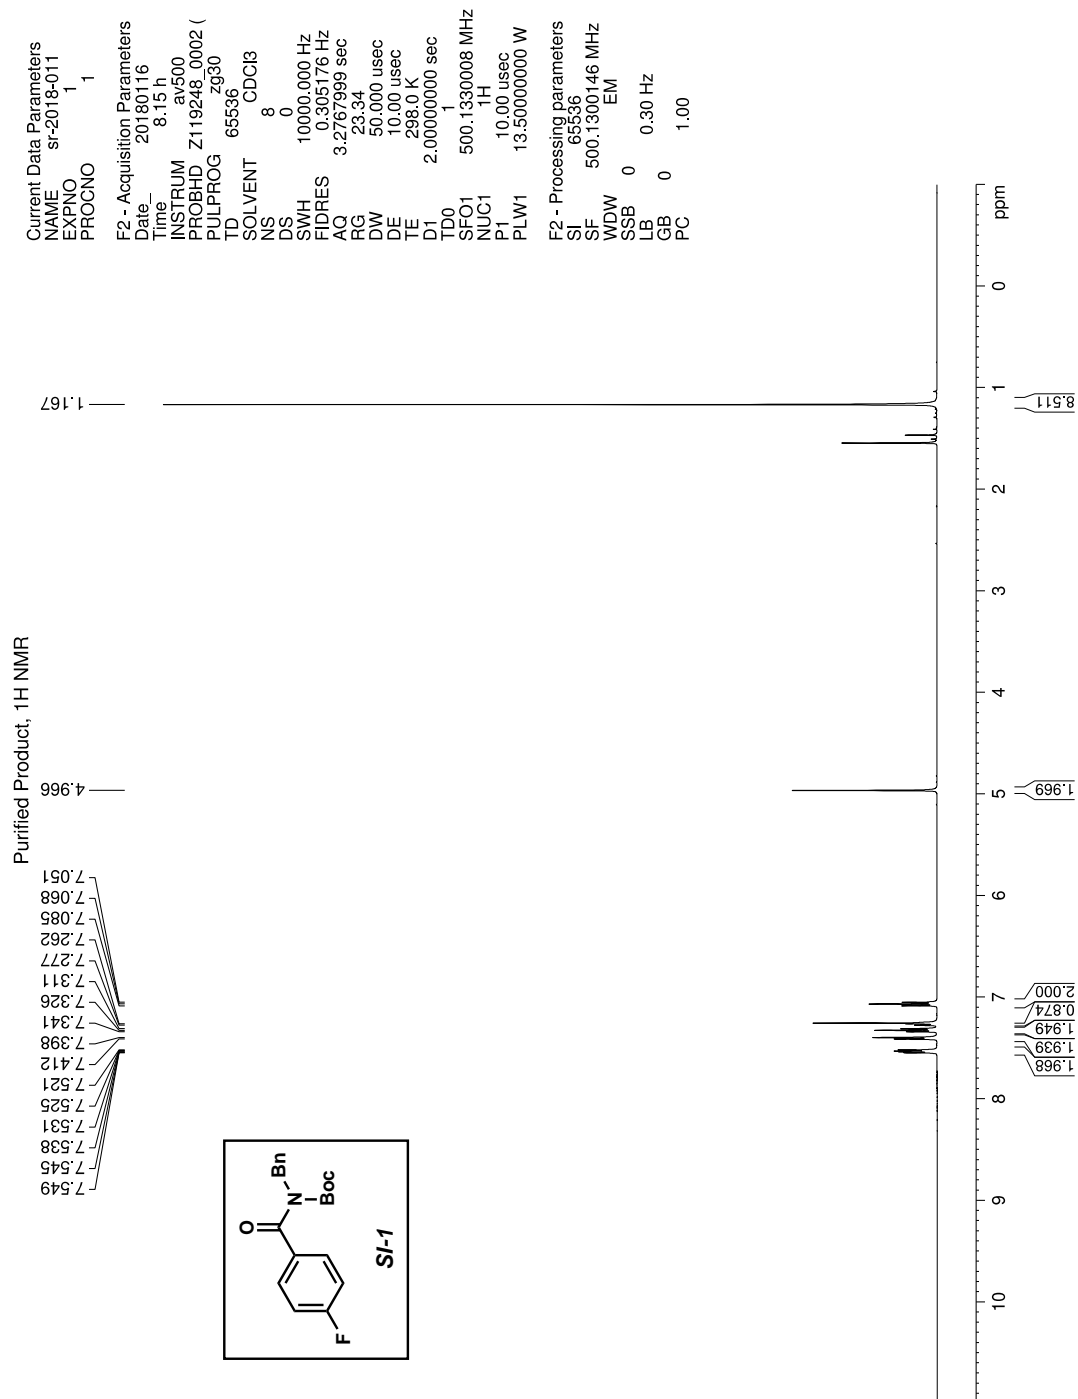

Supplementary Figure 3. <sup>1</sup>H NMR spectrum for compound **SI-1**.



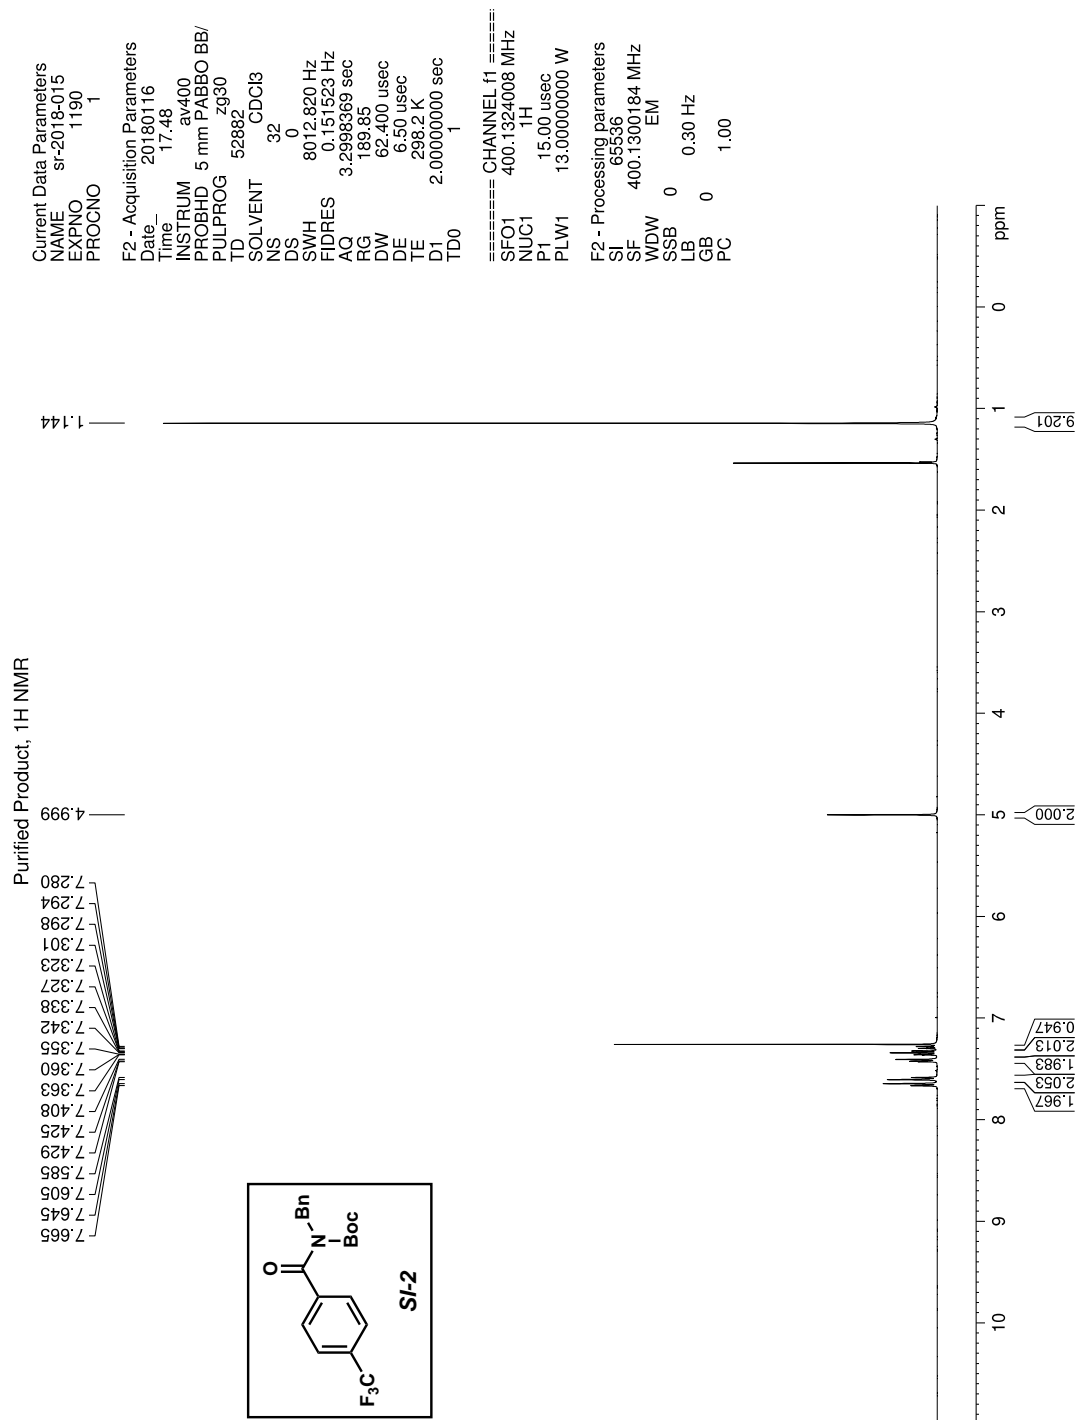

Supplementary Figure 4. <sup>1</sup>H NMR spectrum for compound SI-2.



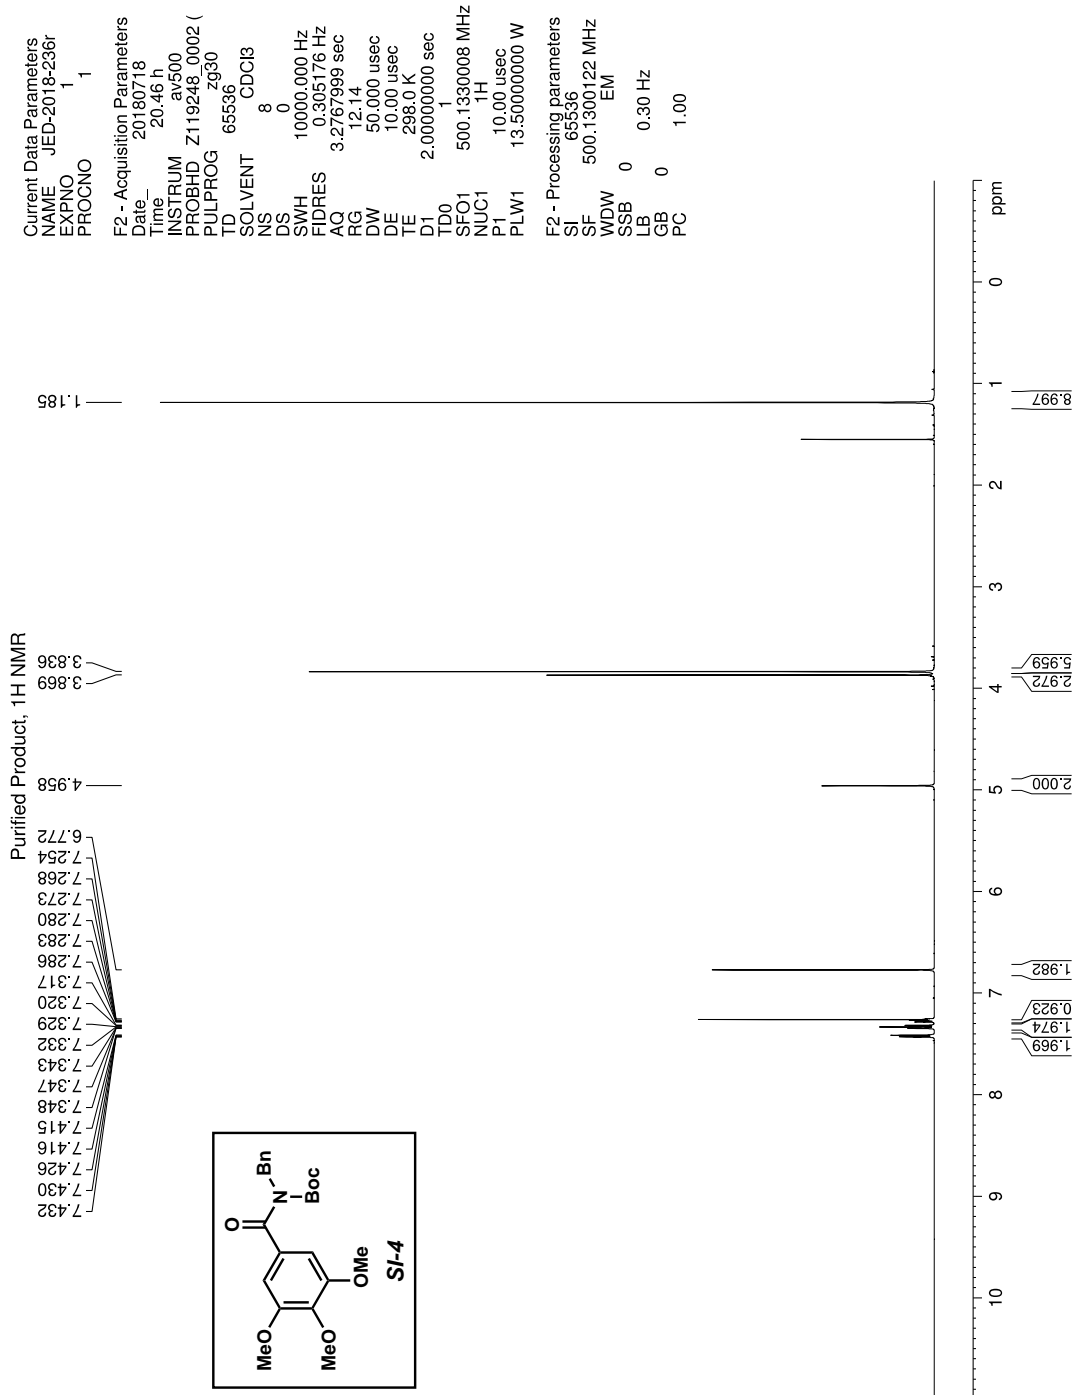

Supplementary Figure 6. <sup>1</sup>H NMR spectrum for compound **SI-4**.

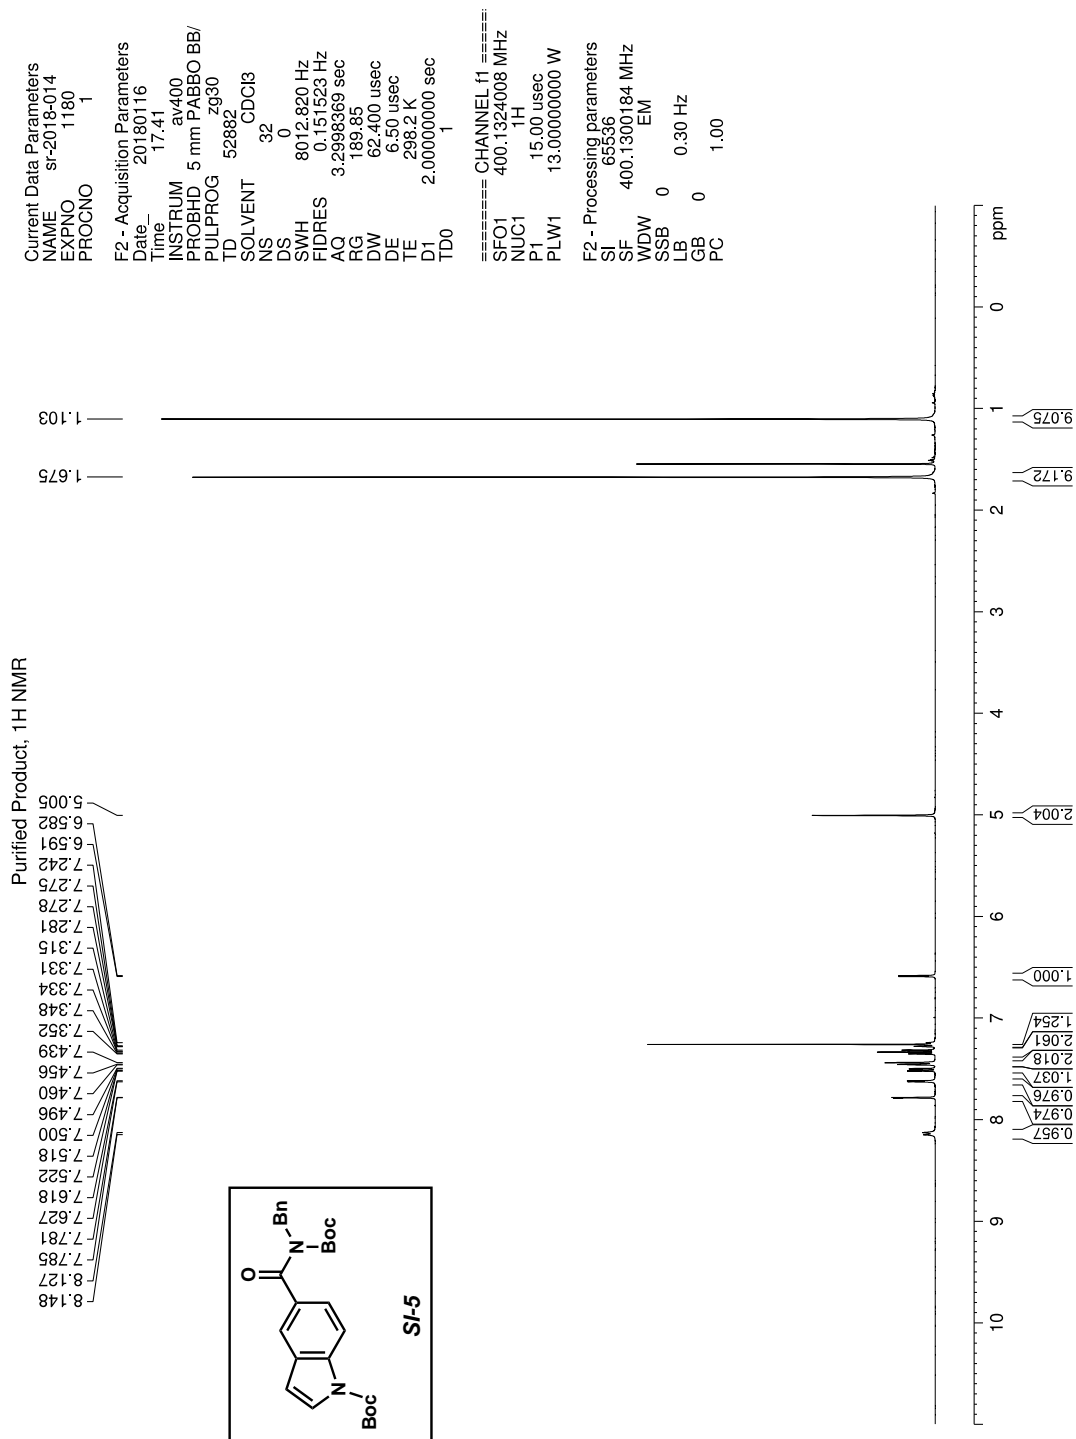

Supplementary Figure 7. <sup>1</sup>H NMR spectrum for compound SI-5.

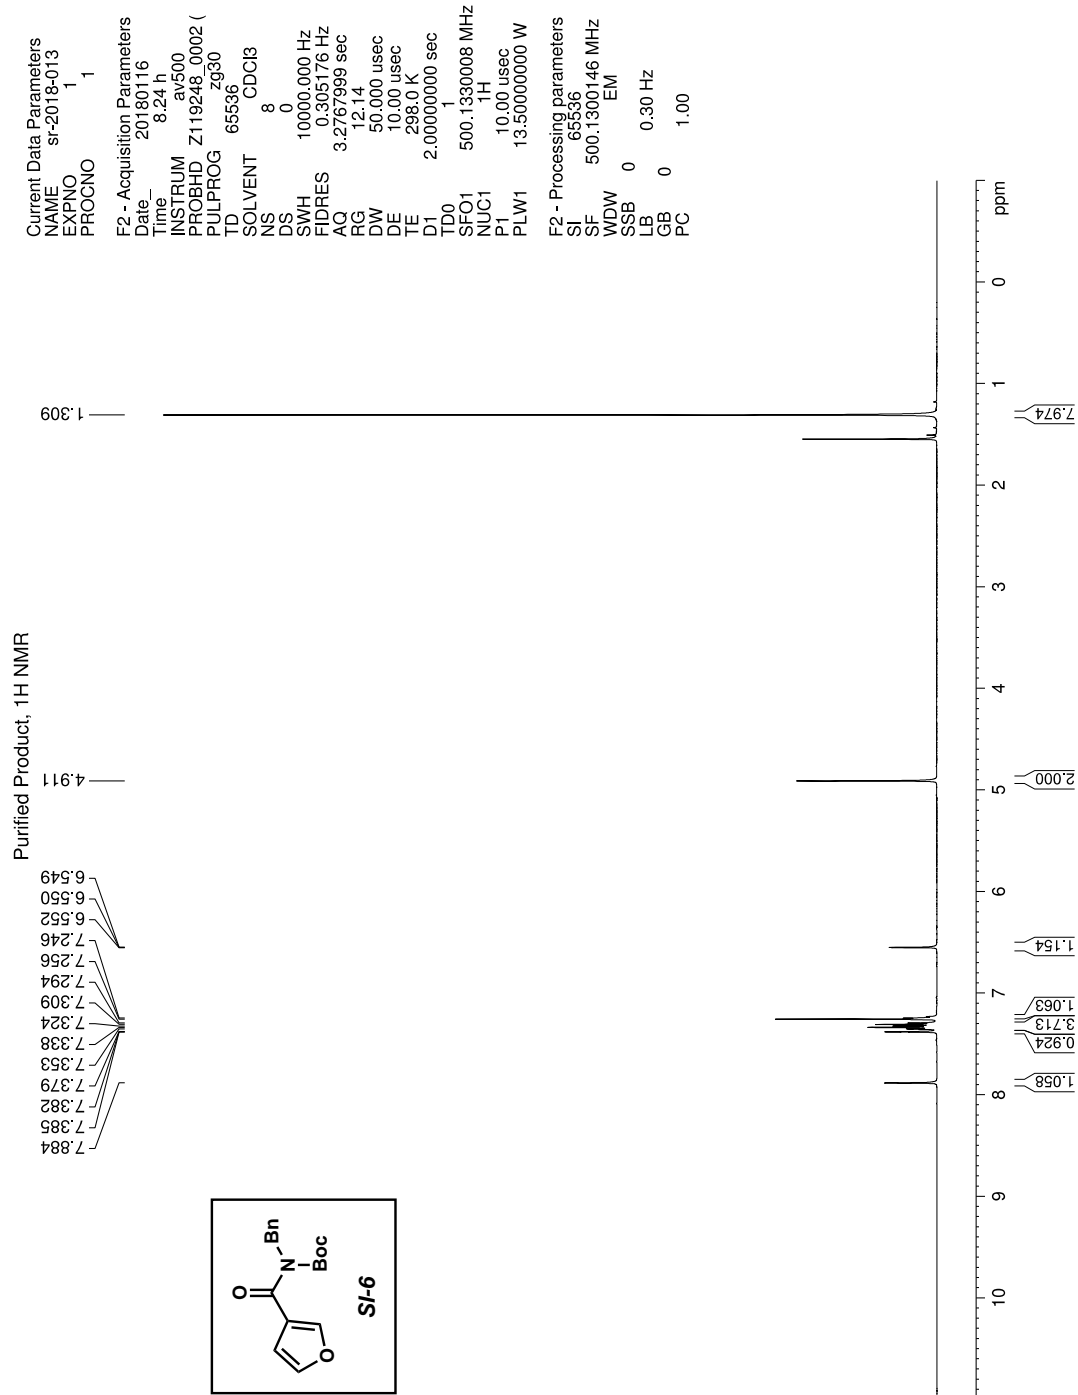

Supplementary Figure 8. <sup>1</sup>H NMR spectrum for compound **SI-6**.

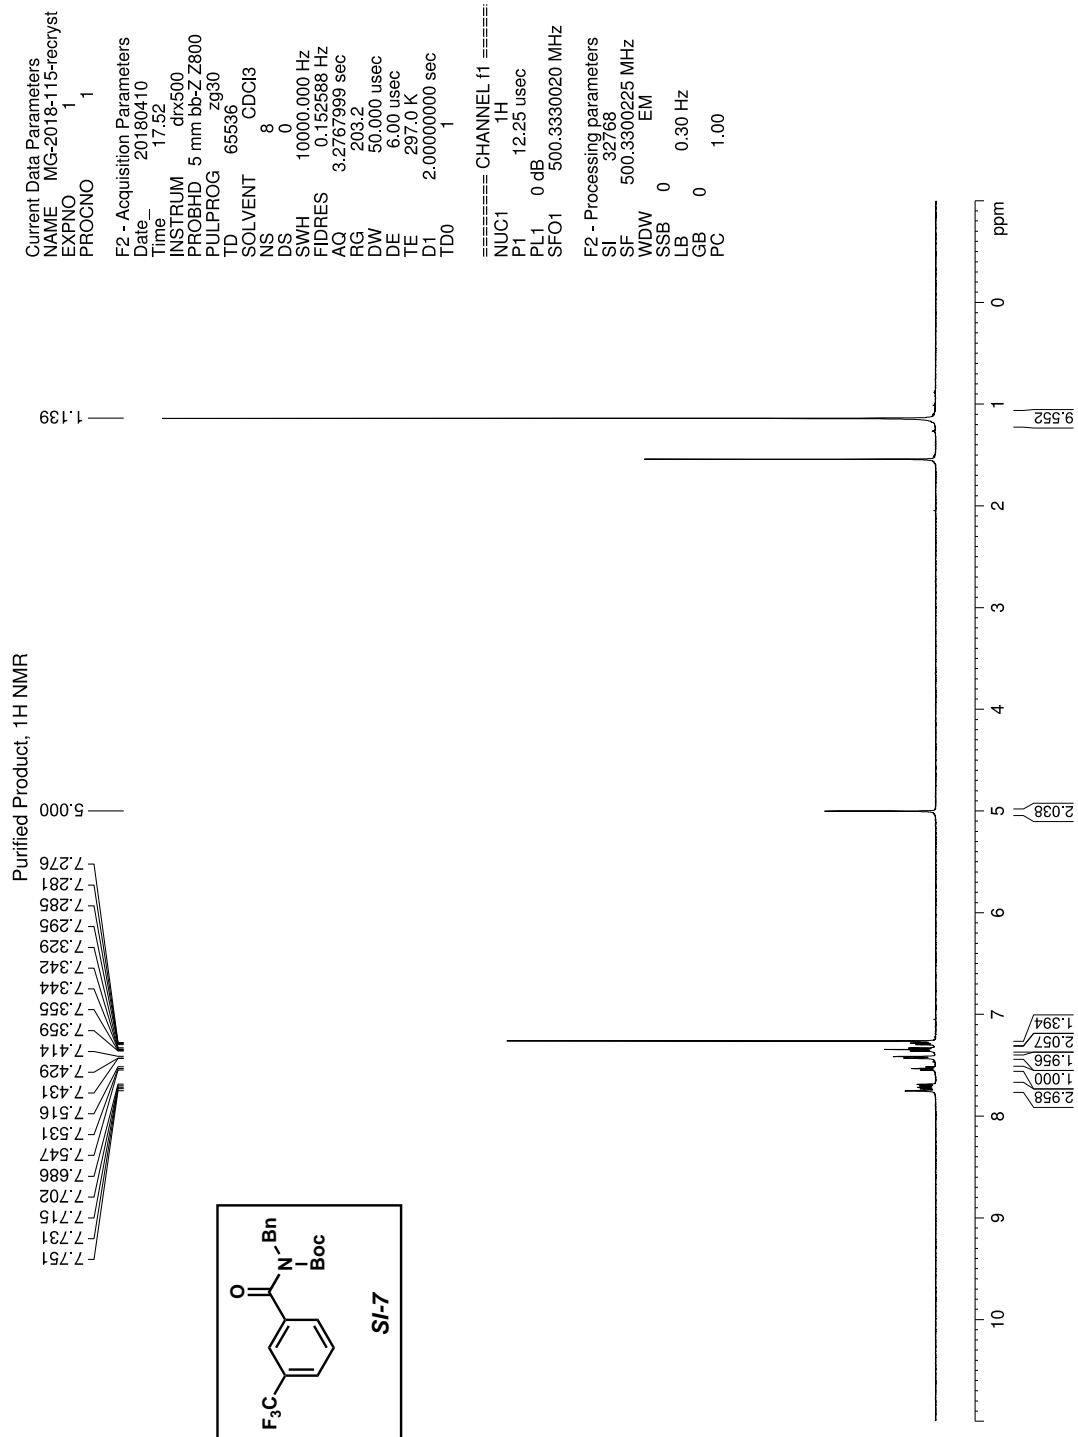

Supplementary Figure 9. <sup>1</sup>H NMR spectrum for compound SI-7.

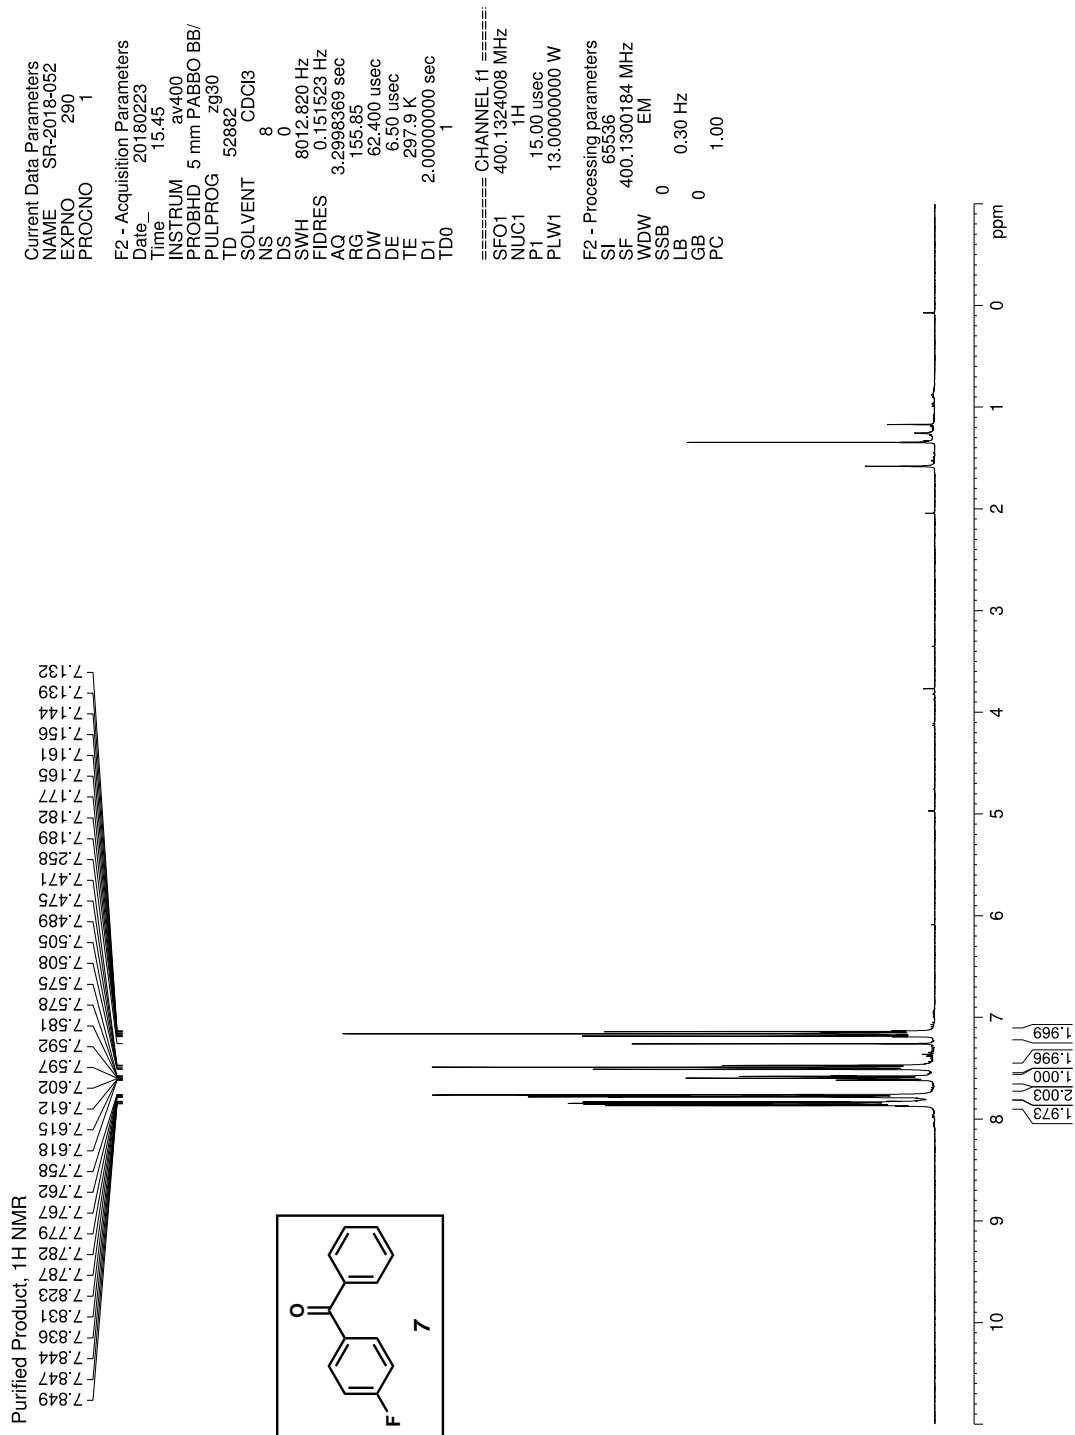

Supplementary Figure 10. <sup>1</sup>H NMR spectrum for compound 7.

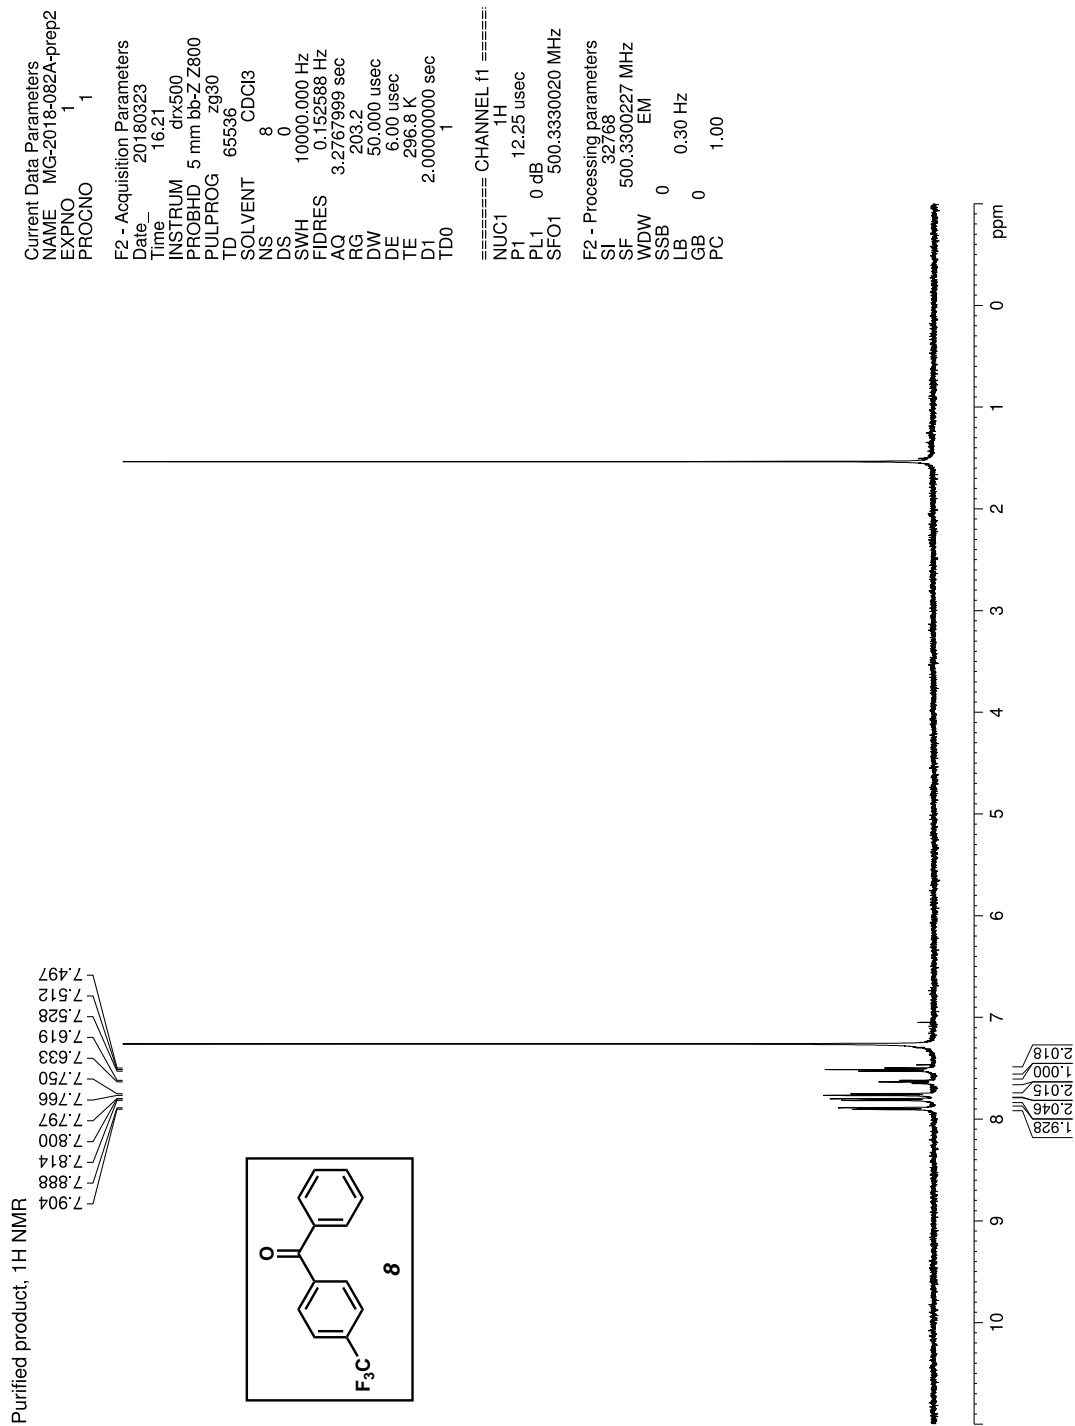

**Supplementary Figure 11.** <sup>1</sup>H NMR spectrum for compound **8**.





Purified product, <sup>1</sup>H NMR

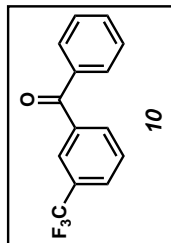

Current Data Parameters  
NAME MG-2018-103-prep  
EXPNO 1  
PROCNO 1

F2 - Acquisition Parameters  
Date\_ 20180406  
Time\_ 15.48  
INSTRUM drx500  
PROBHD 5 mm bb-Z z800  
PULPROG zg30  
TD 65536  
SOLVENT CDCl3  
NS 8  
DS 0  
SWH 1000.000 Hz  
FIDRES 0.152588 Hz  
AQ 3.2767999 sec  
RG 203.2  
DW 50.000 usec  
DE 6.00 usec  
TE 297.0 K  
D1 2.00000000 sec  
TD0 1

==== CHANNEL f1 =====  
NUC1 1H  
P1 12.25 usec  
PL1 0 dB  
SFO1 500.3330020 MHz  
F2 - Processing parameters  
SI 32768  
SF 500.3279439 MHz  
WDW EM  
SSB 0  
LB 0.30 Hz  
GB 0  
PC 1.00

8.066  
7.988  
7.973  
7.859  
7.843  
7.805  
7.790  
7.649  
7.634  
7.619  
7.534  
7.519  
7.503

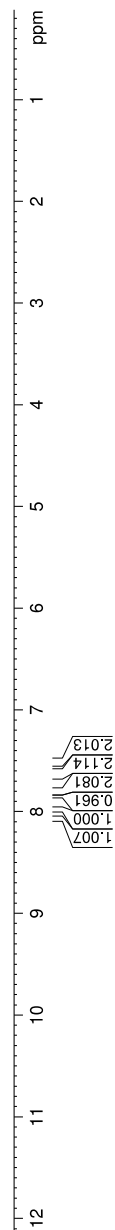

Supplementary Figure 13. <sup>1</sup>H NMR spectrum for compound 10.

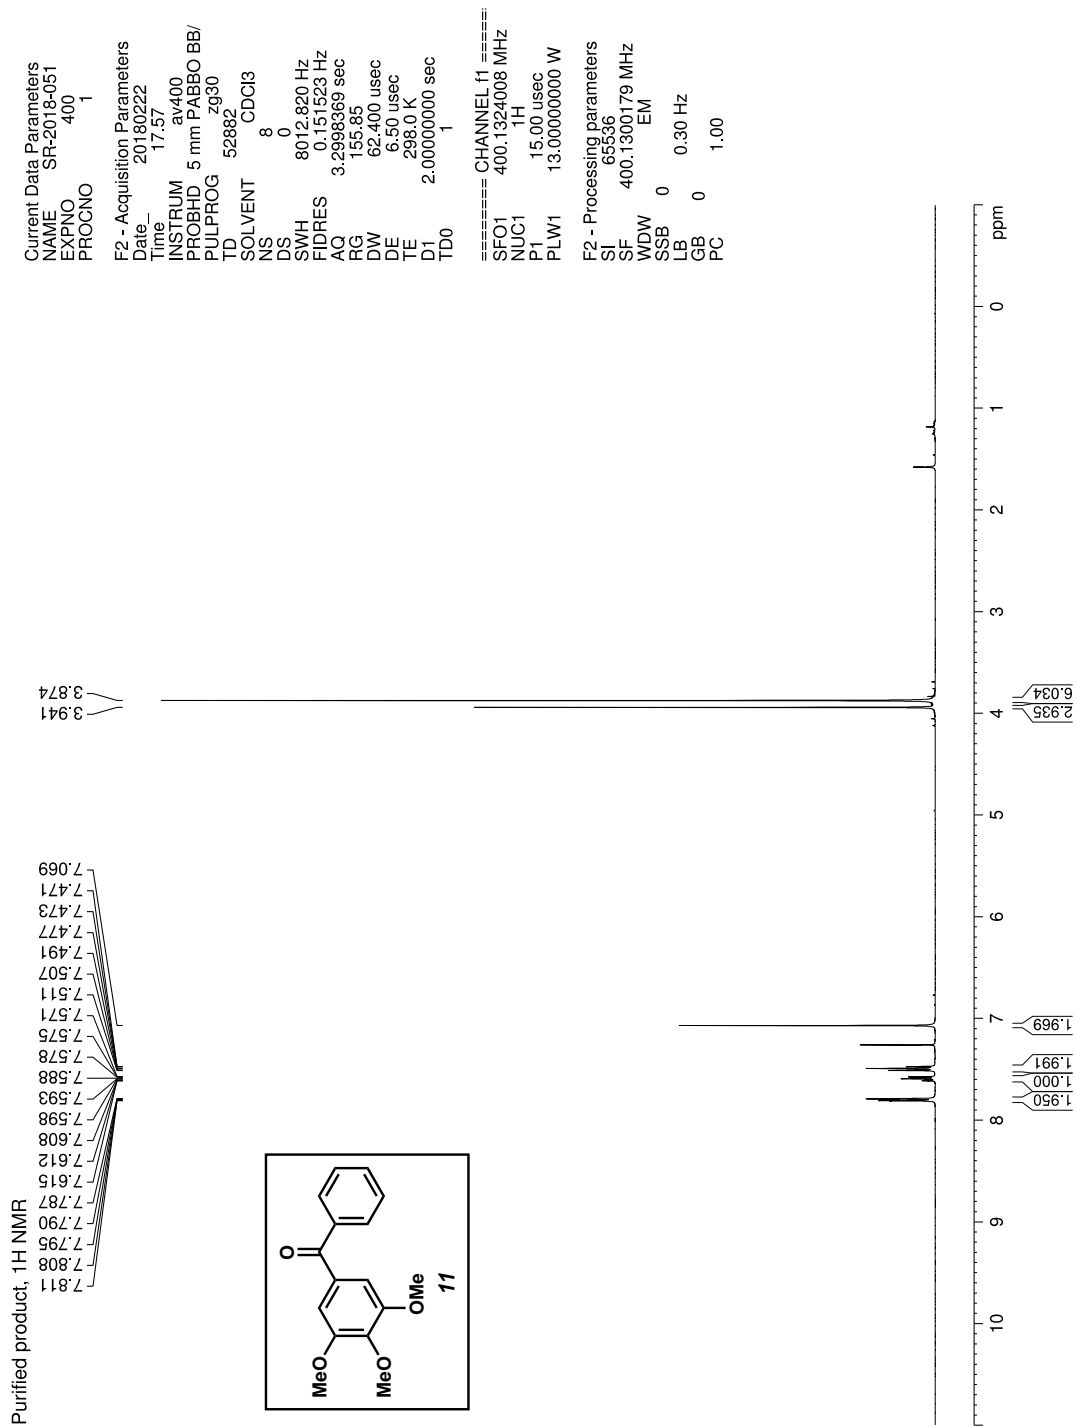

Supplementary Figure 14. <sup>1</sup>H NMR spectrum for compound 11.

Current Data Parameters  
 NAME MG-2018-250-1H-drie  
 EXPNO 10  
 PROCNO 1

F2 - Acquisition Parameters  
 Date\_ 20180828  
 Time\_ 18.14 h  
 INSTRUM av500  
 PROBHD Z119248\_0002 (zg30)  
 PULPROG zg30  
 TD 65536  
 SOLVENT CDCI3  
 NS 8  
 DS 0  
 SWH 10000.000 Hz  
 FIDRES 0.305176 Hz  
 AQ 3.2767999 sec  
 RG 12.14  
 DW 50.000 usec  
 DE 10.00 usec  
 TE 298.0 K  
 D1 2.00000000 sec  
 TD0 1  
 SFO1 500.1330008 MHz  
 NUC1 1H  
 P1 10.00 usec  
 PLW1 13.50000000 W

F2 - Processing parameters  
 SI 65536  
 SF 500.1300121 MHz  
 WDW EM  
 SSB 0  
 LB 0  
 GB 0  
 PC 1.00

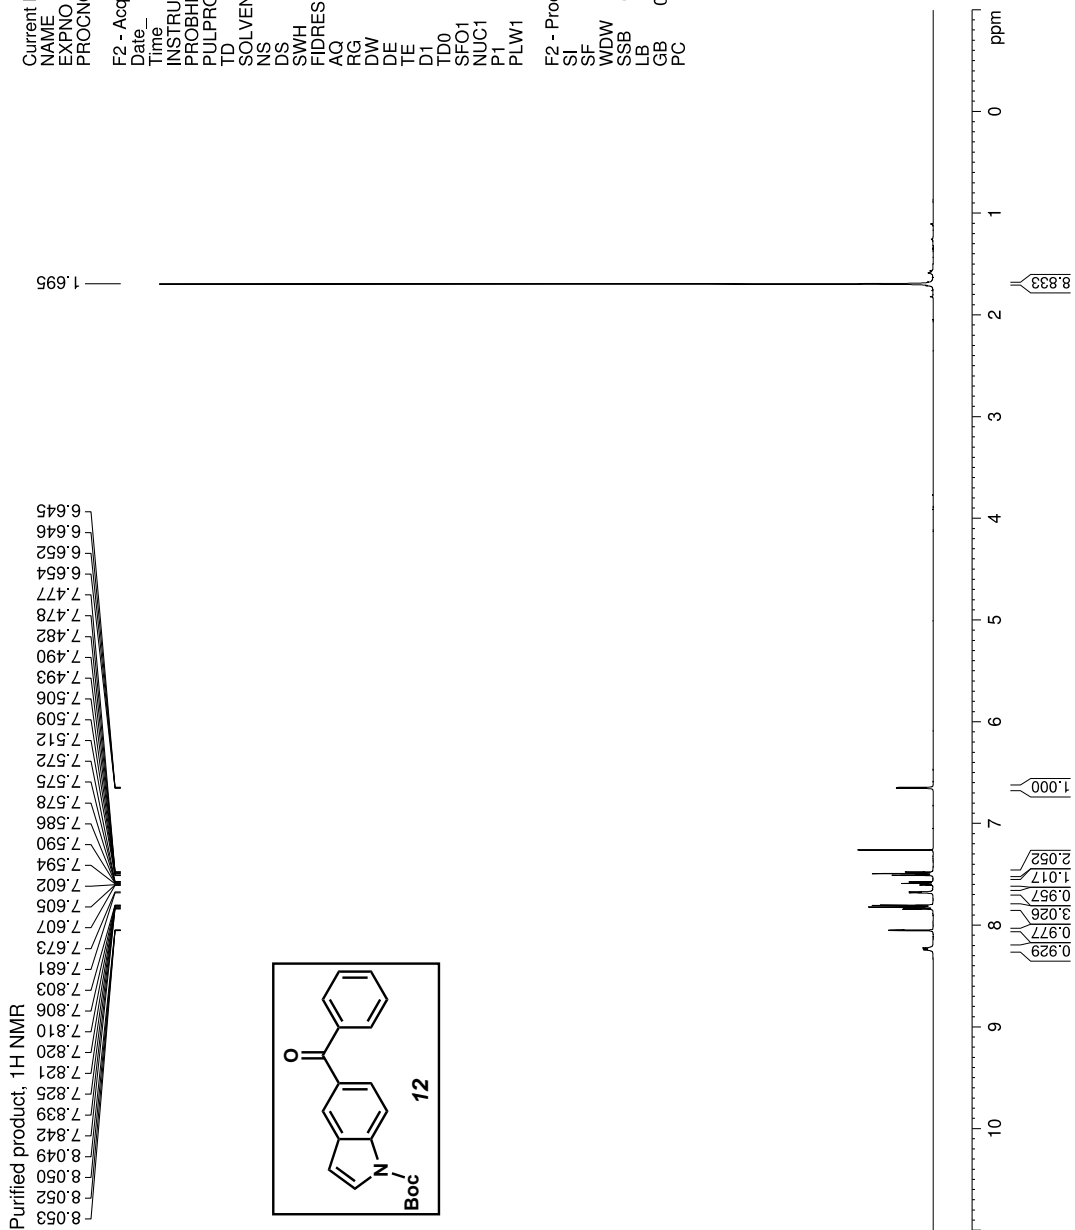

Supplementary Figure 15. <sup>1</sup>H NMR spectrum for compound 12.

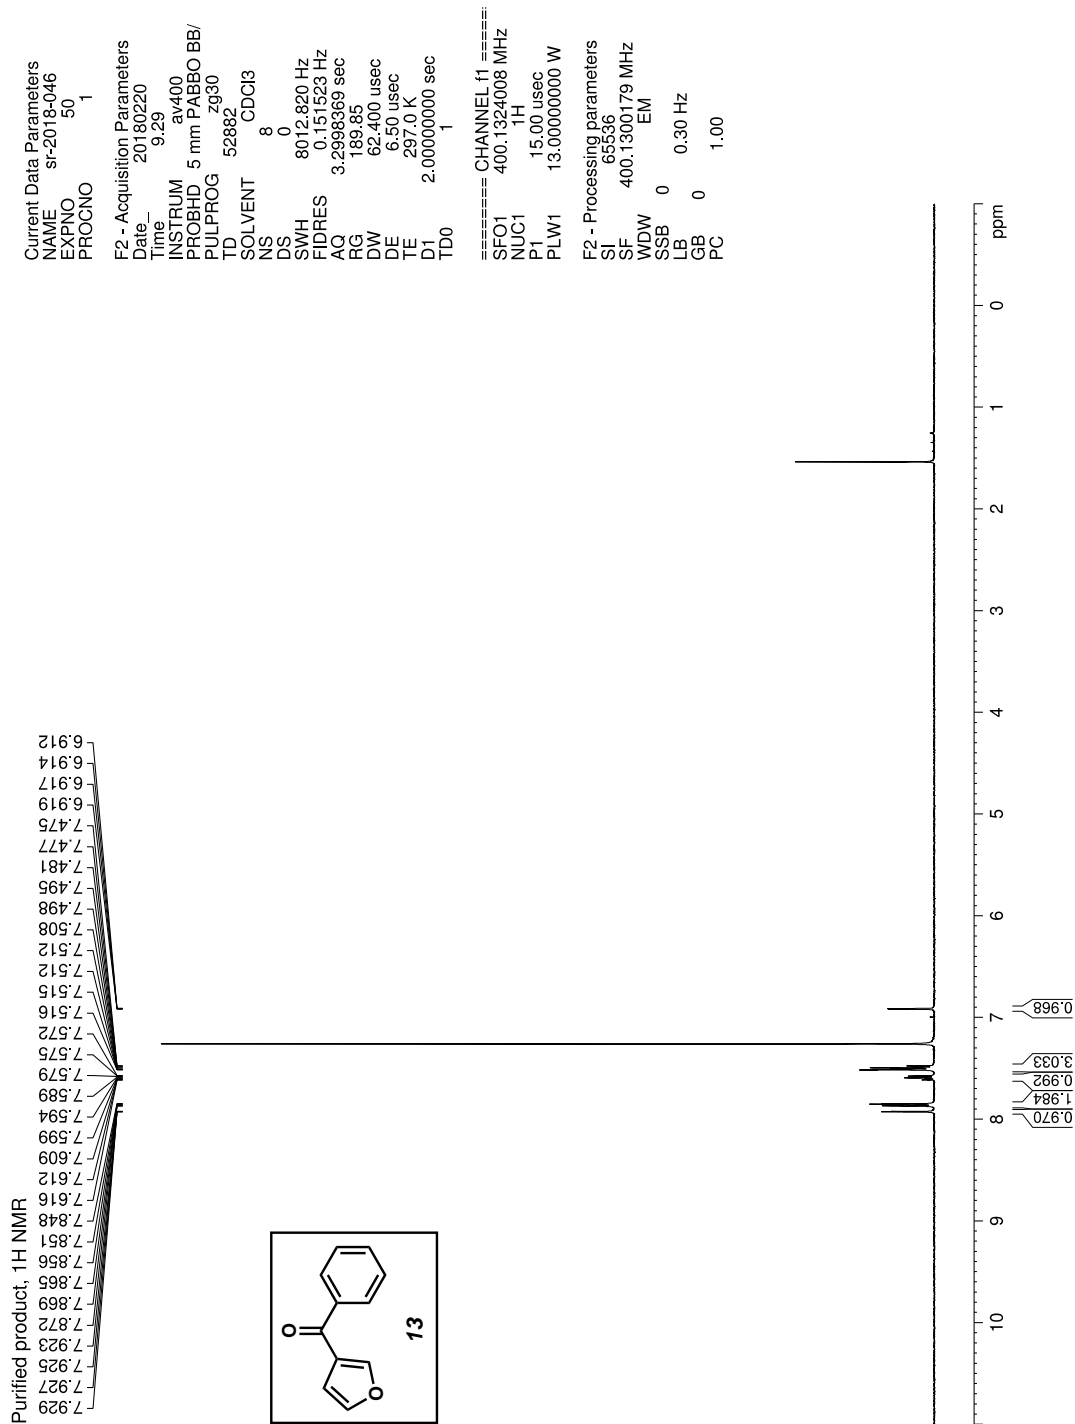

Supplementary Figure 16. <sup>1</sup>H NMR spectrum for compound 13.

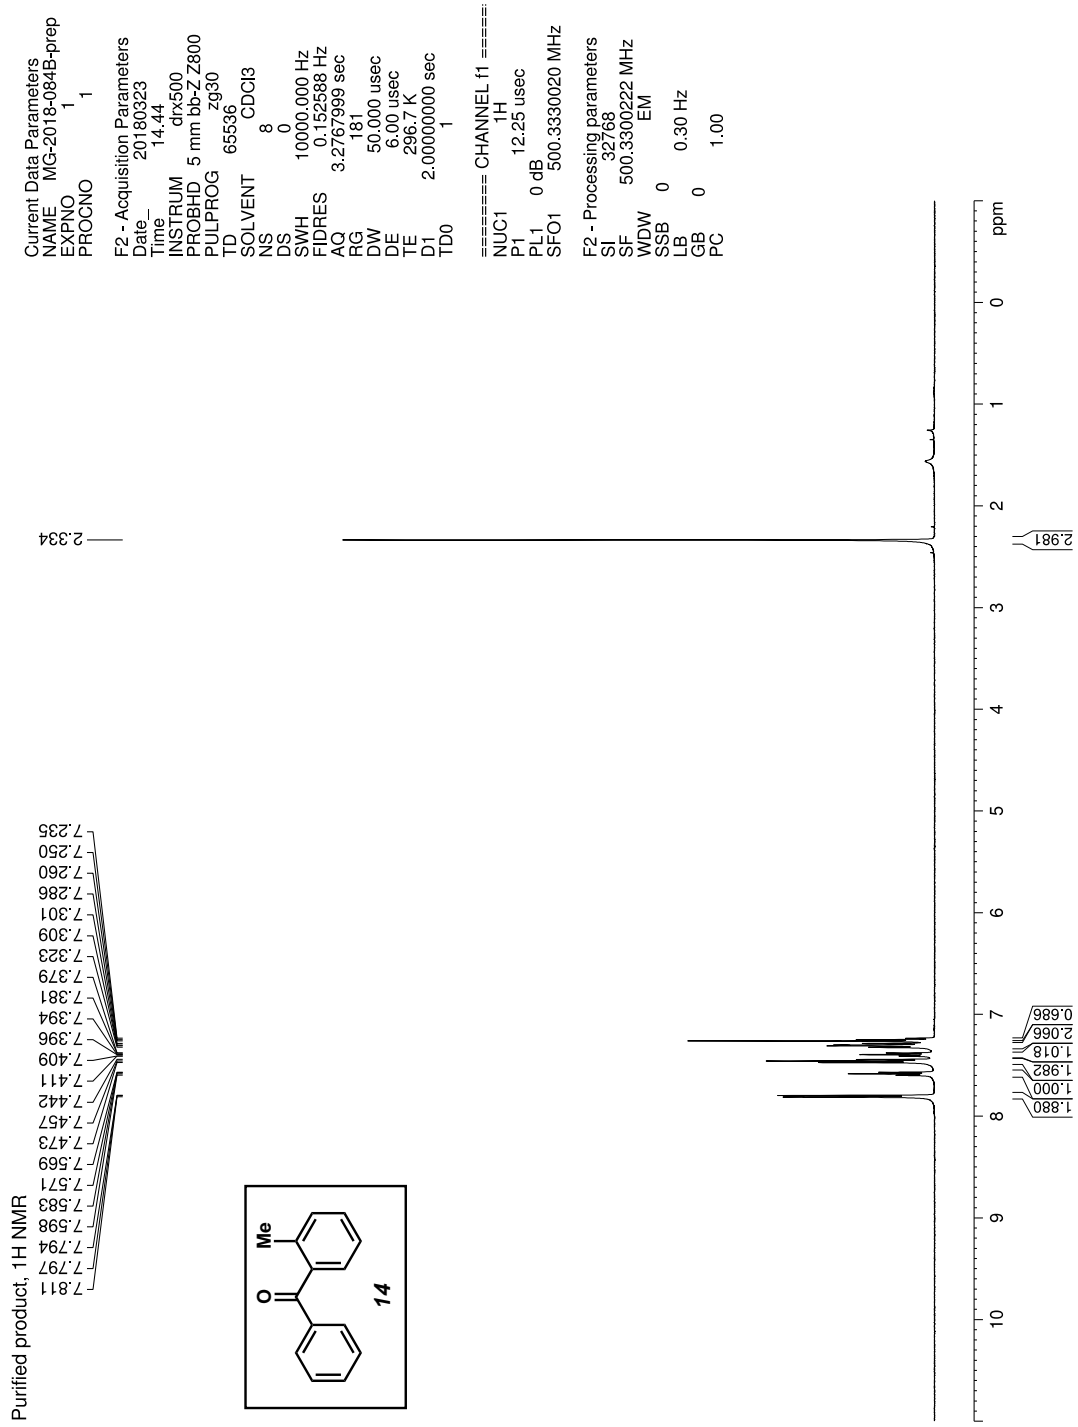

**Supplementary Figure 17.** <sup>1</sup>H NMR spectrum for compound **14**.

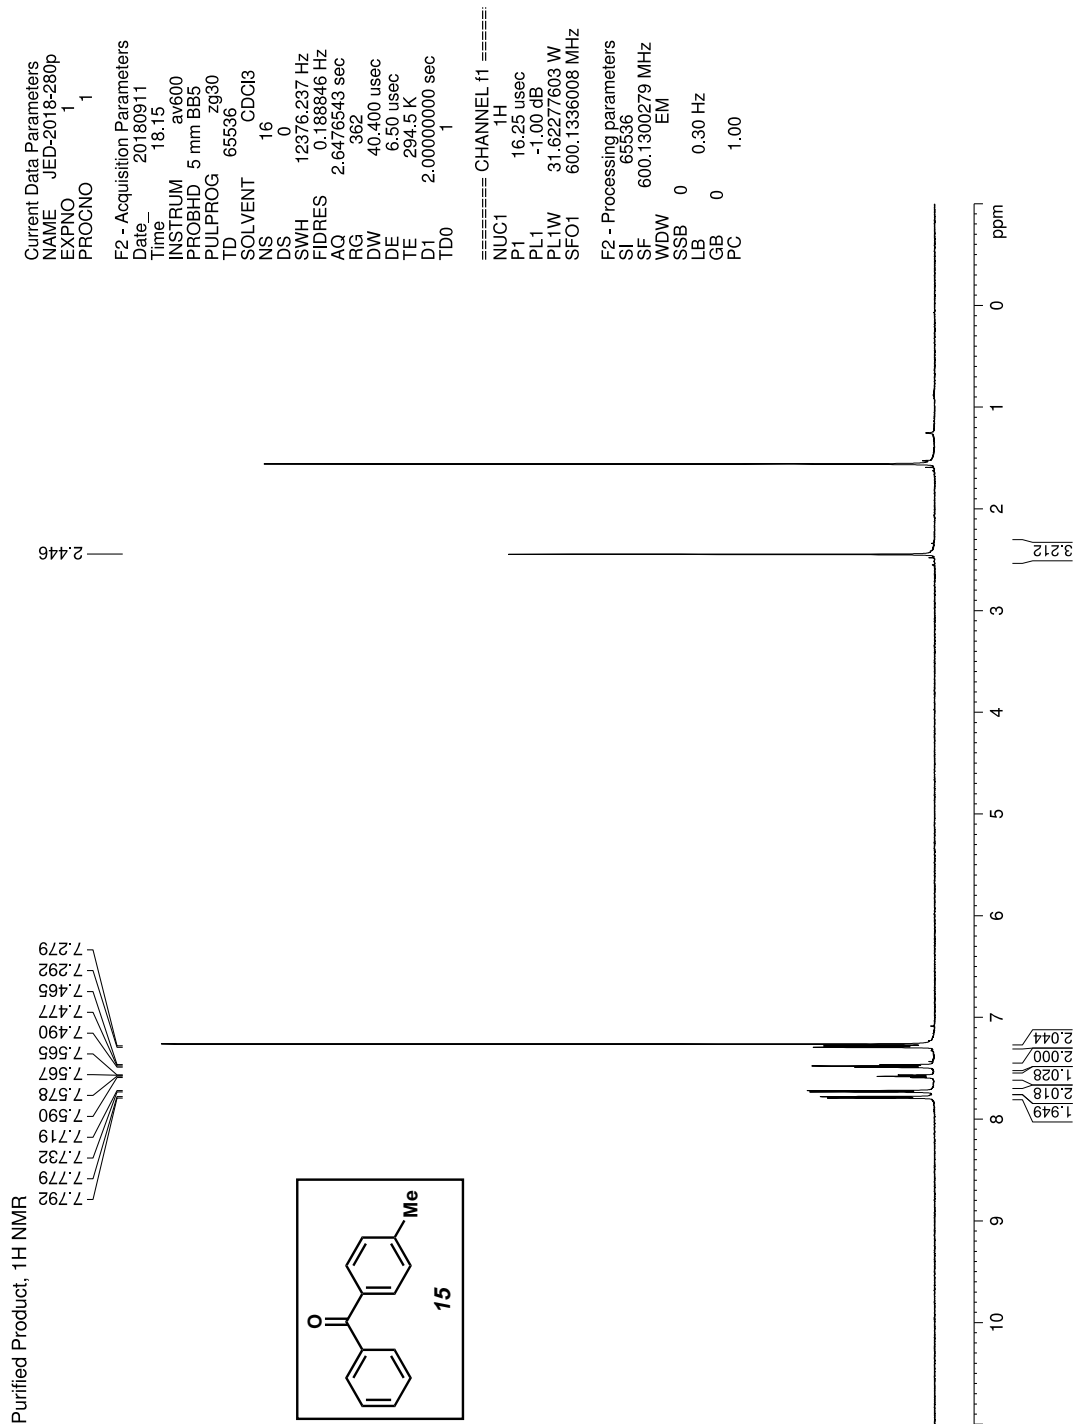

Supplementary Figure 18. <sup>1</sup>H NMR spectrum for compound 15.

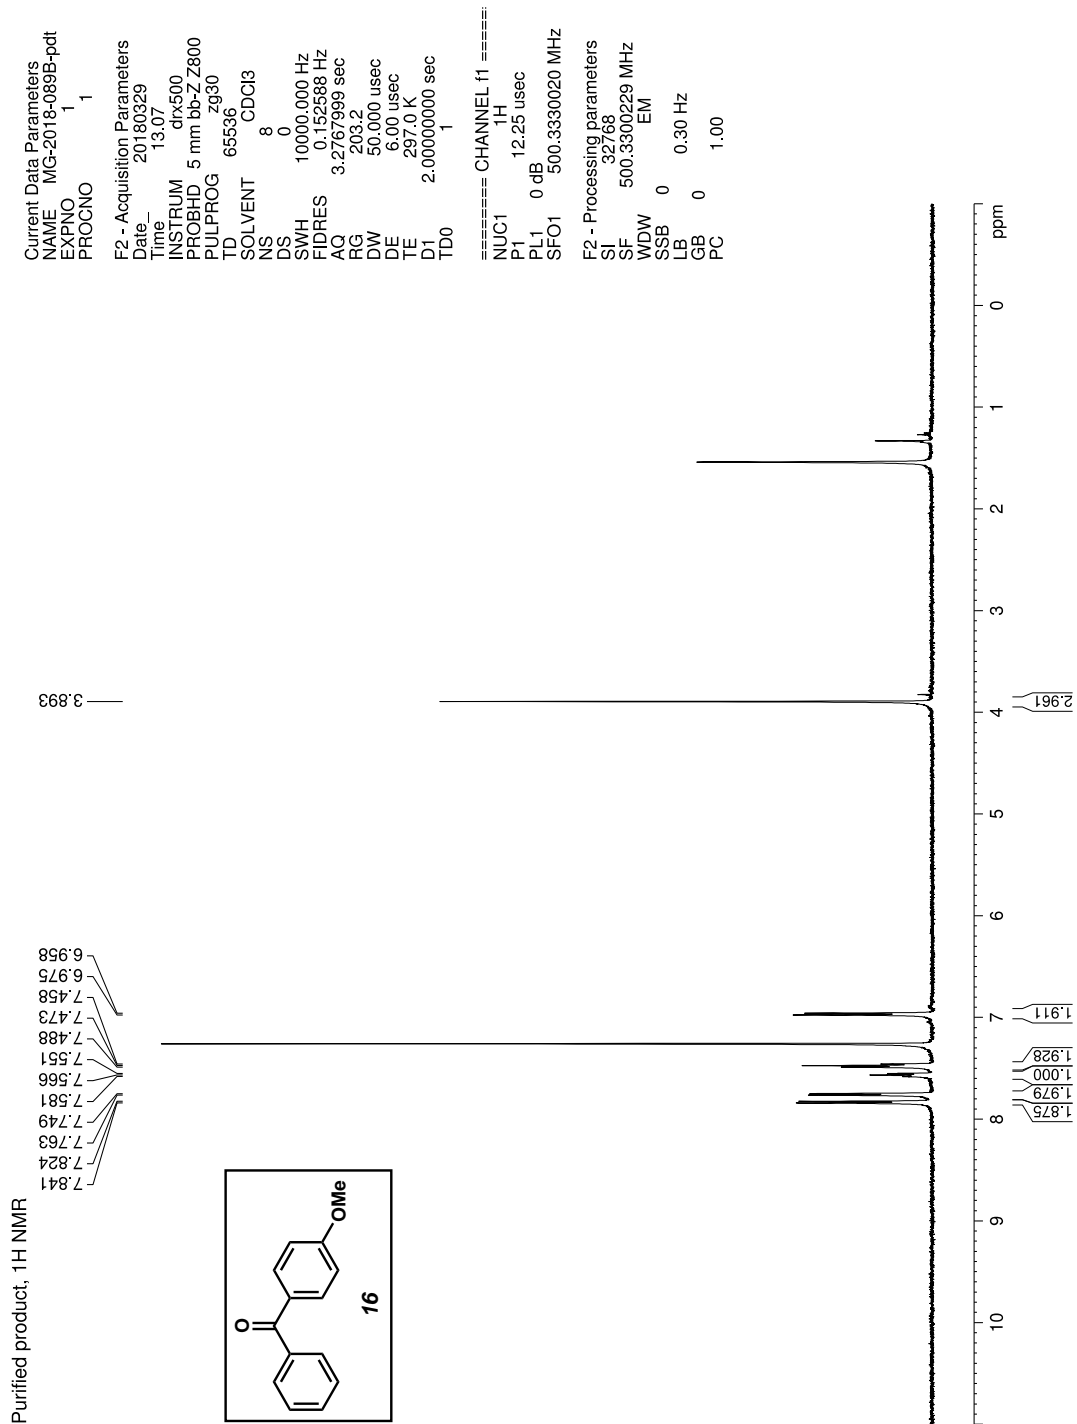

Supplementary Figure 19. <sup>1</sup>H NMR spectrum for compound 16.







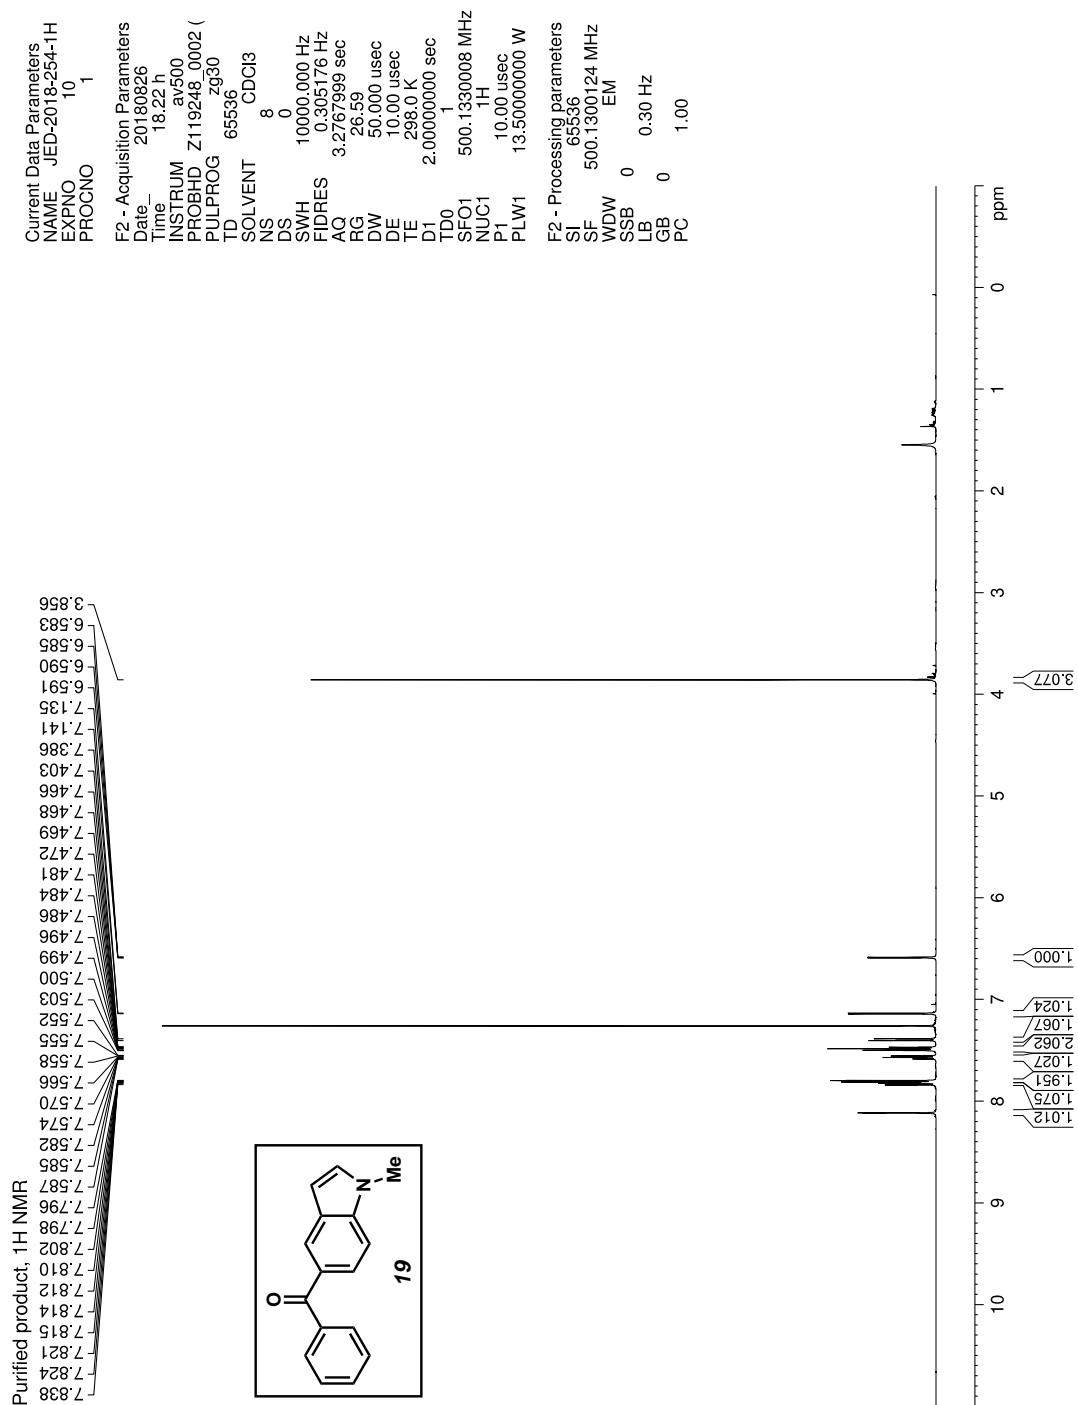

Supplementary Figure 22. <sup>1</sup>H NMR spectrum for compound 19.

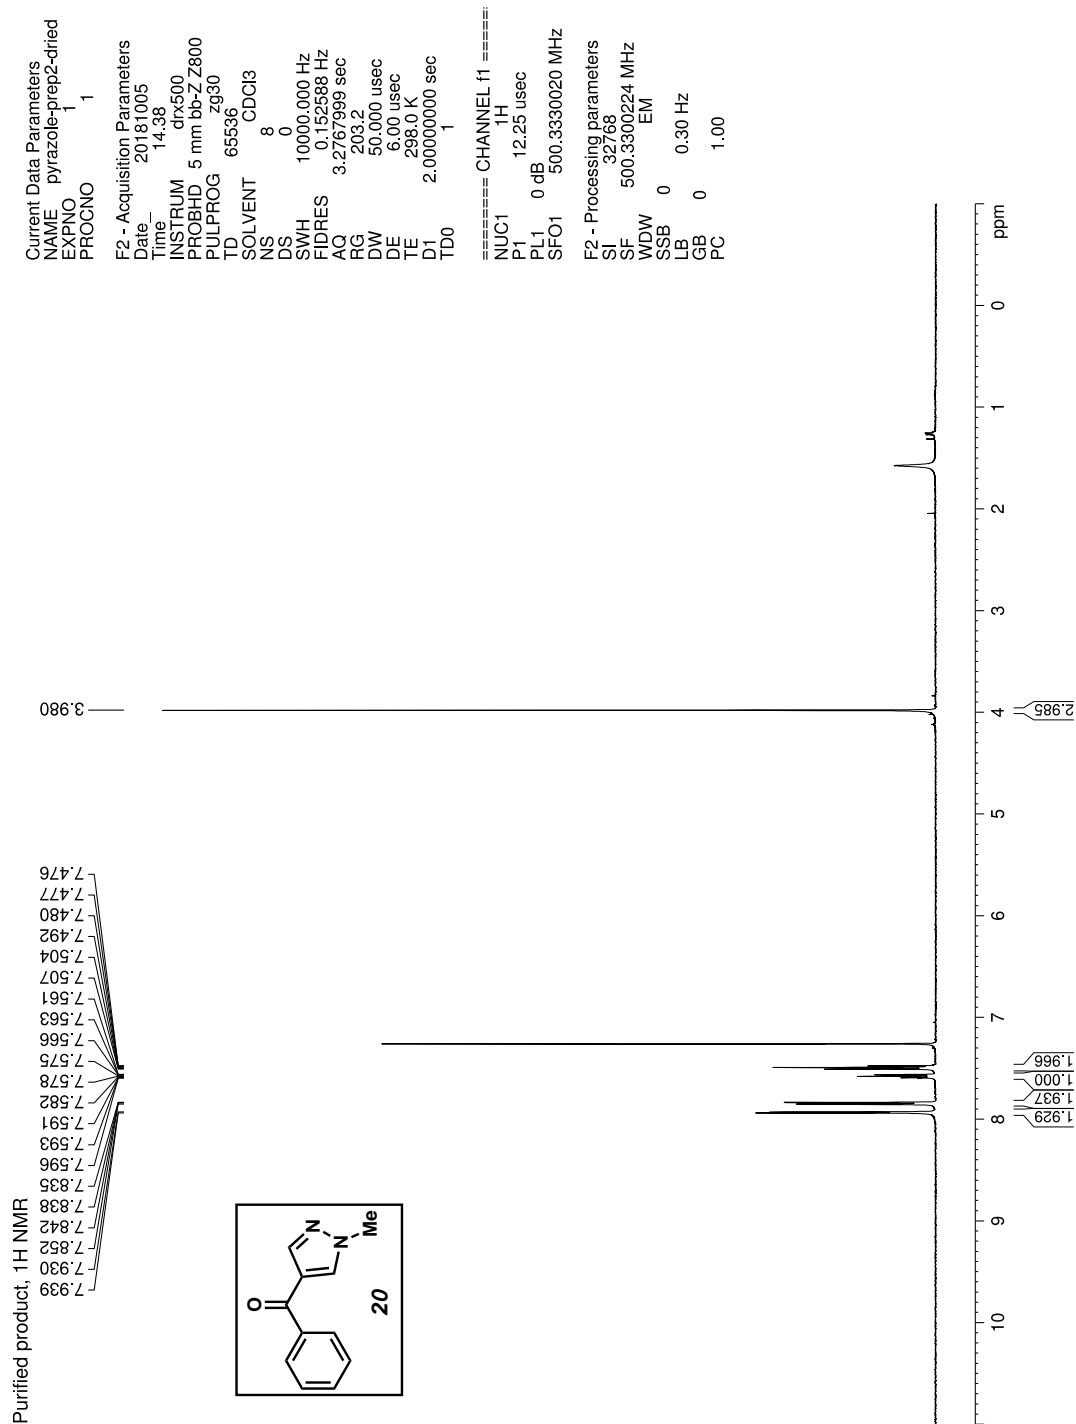

Supplementary Figure 23. <sup>1</sup>H NMR spectrum for compound 20.

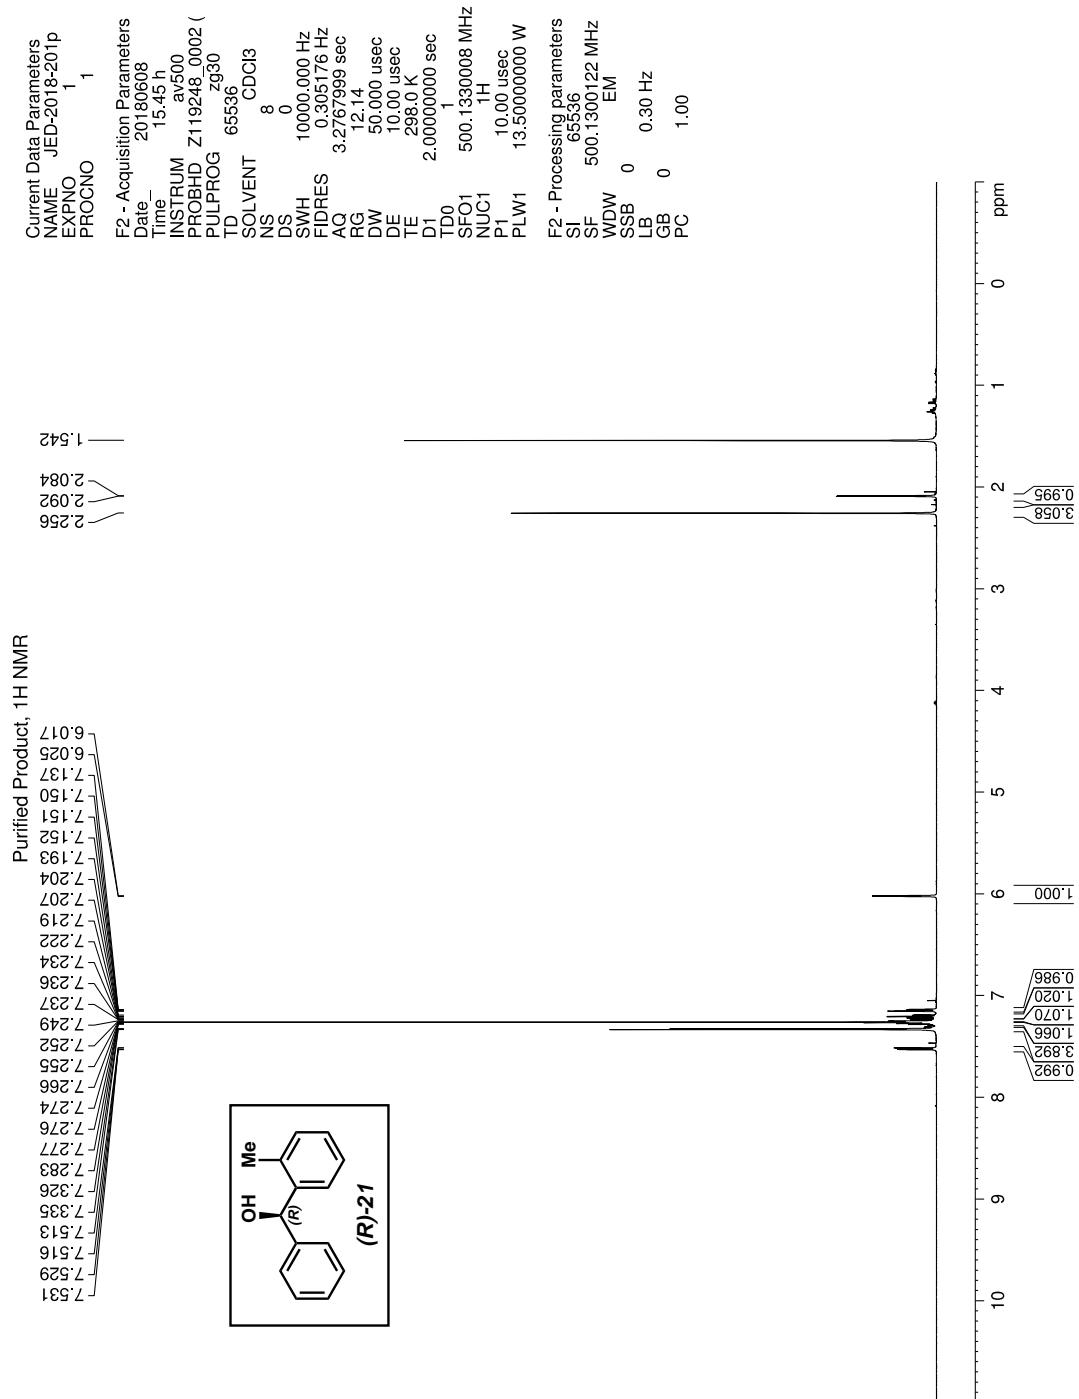

Supplementary Figure 24. <sup>1</sup>H NMR spectrum for compound (R)-21.

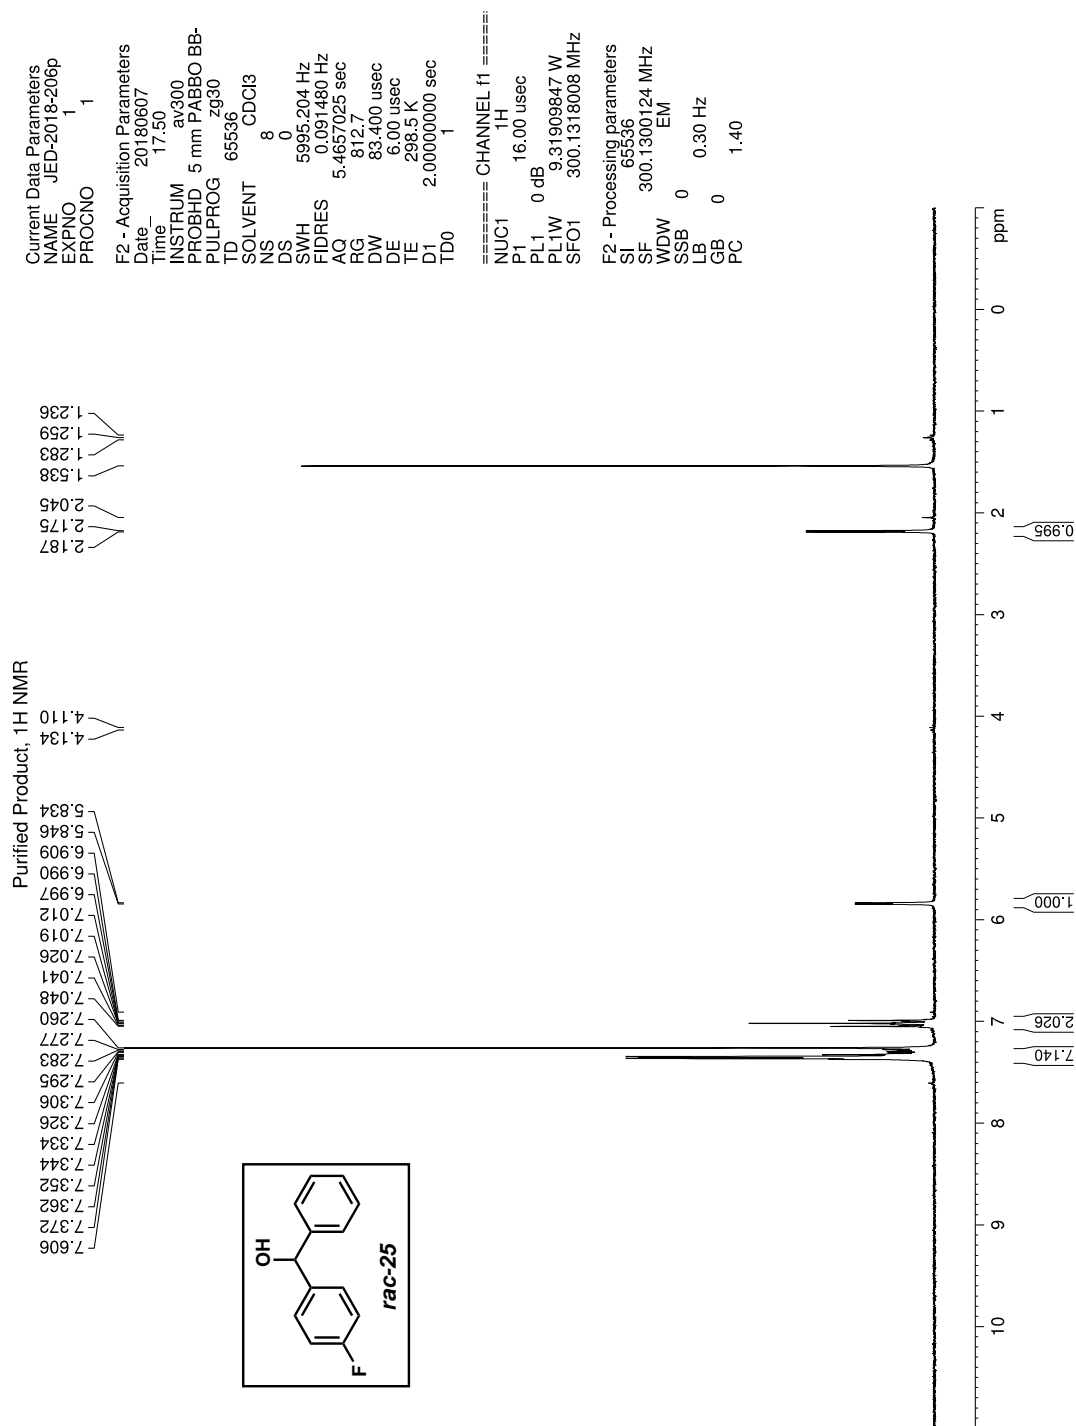

Supplementary Figure 25. <sup>1</sup>H NMR spectrum for compound *rac-25*.

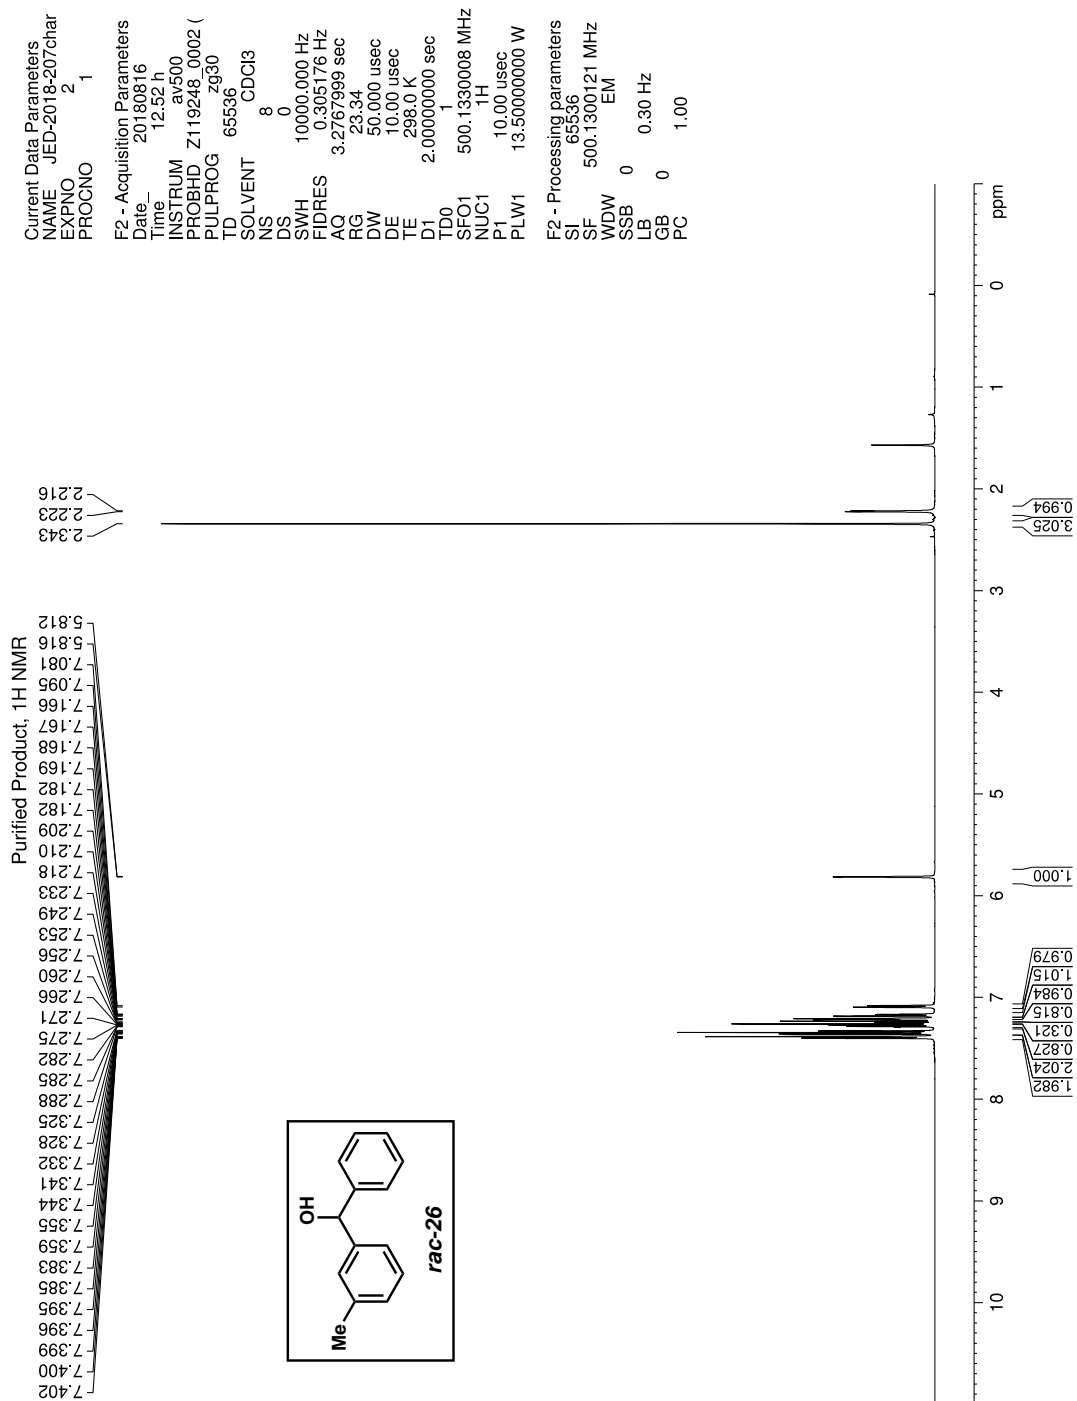

Supplementary Figure 26. <sup>1</sup>H NMR spectrum for compound *rac-26*.

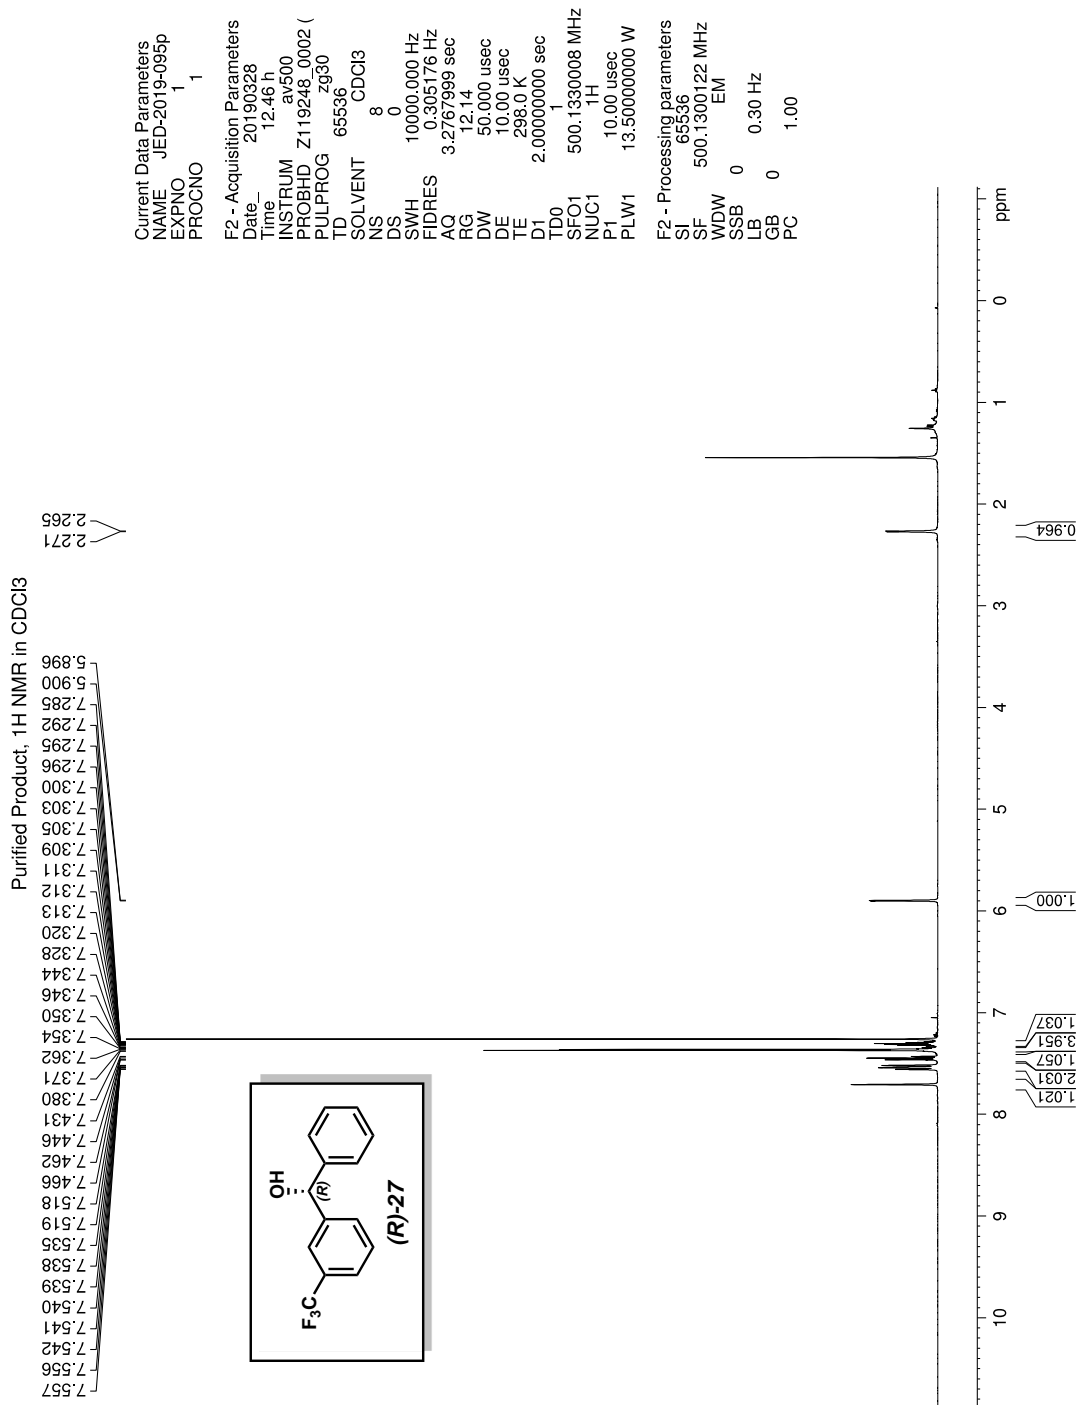

Supplementary Figure 27. <sup>1</sup>H NMR spectrum for compound (R)-27.



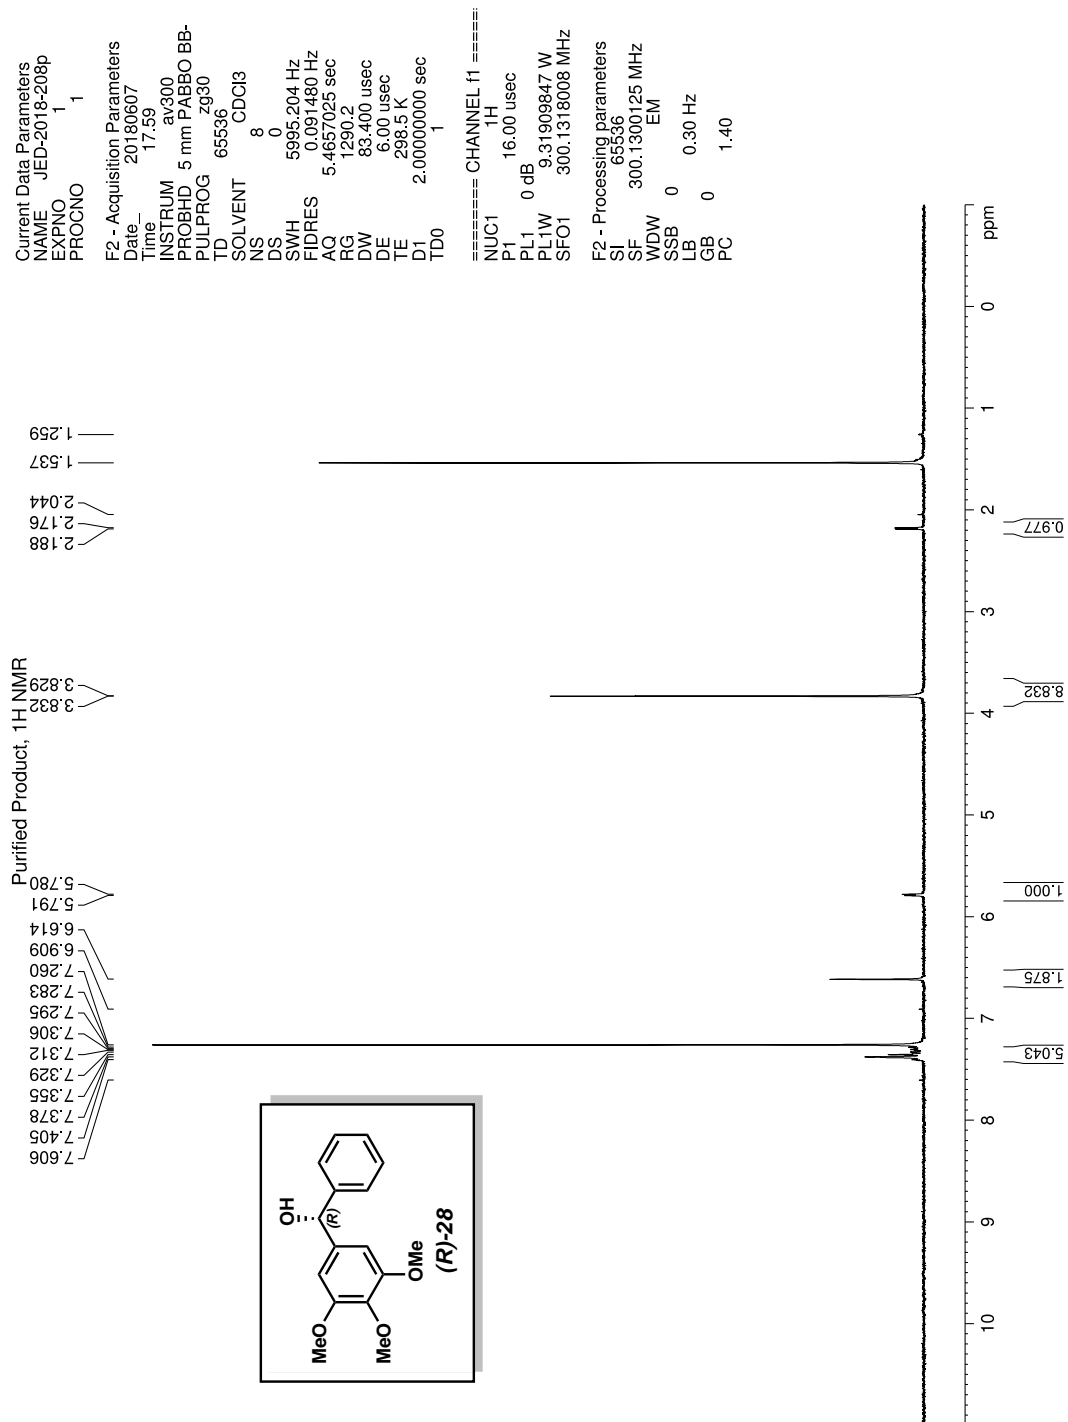

Supplementary Figure 28. <sup>1</sup>H NMR spectrum for compound (R)-28.

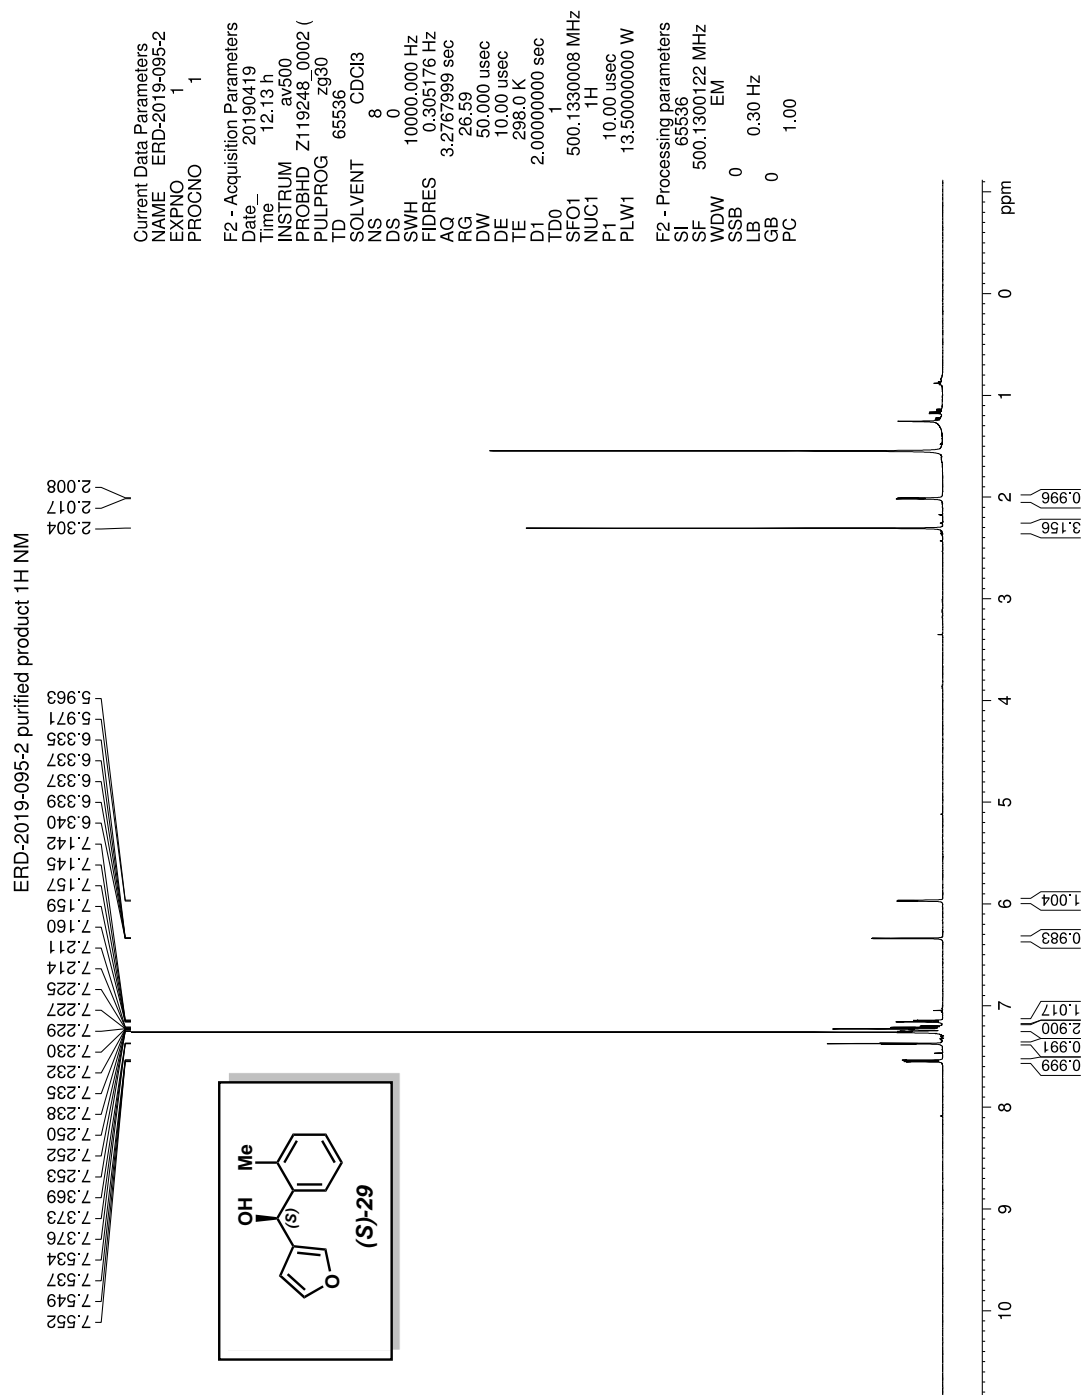

Supplementary Figure 29. <sup>1</sup>H NMR spectrum for compound (S)-29.

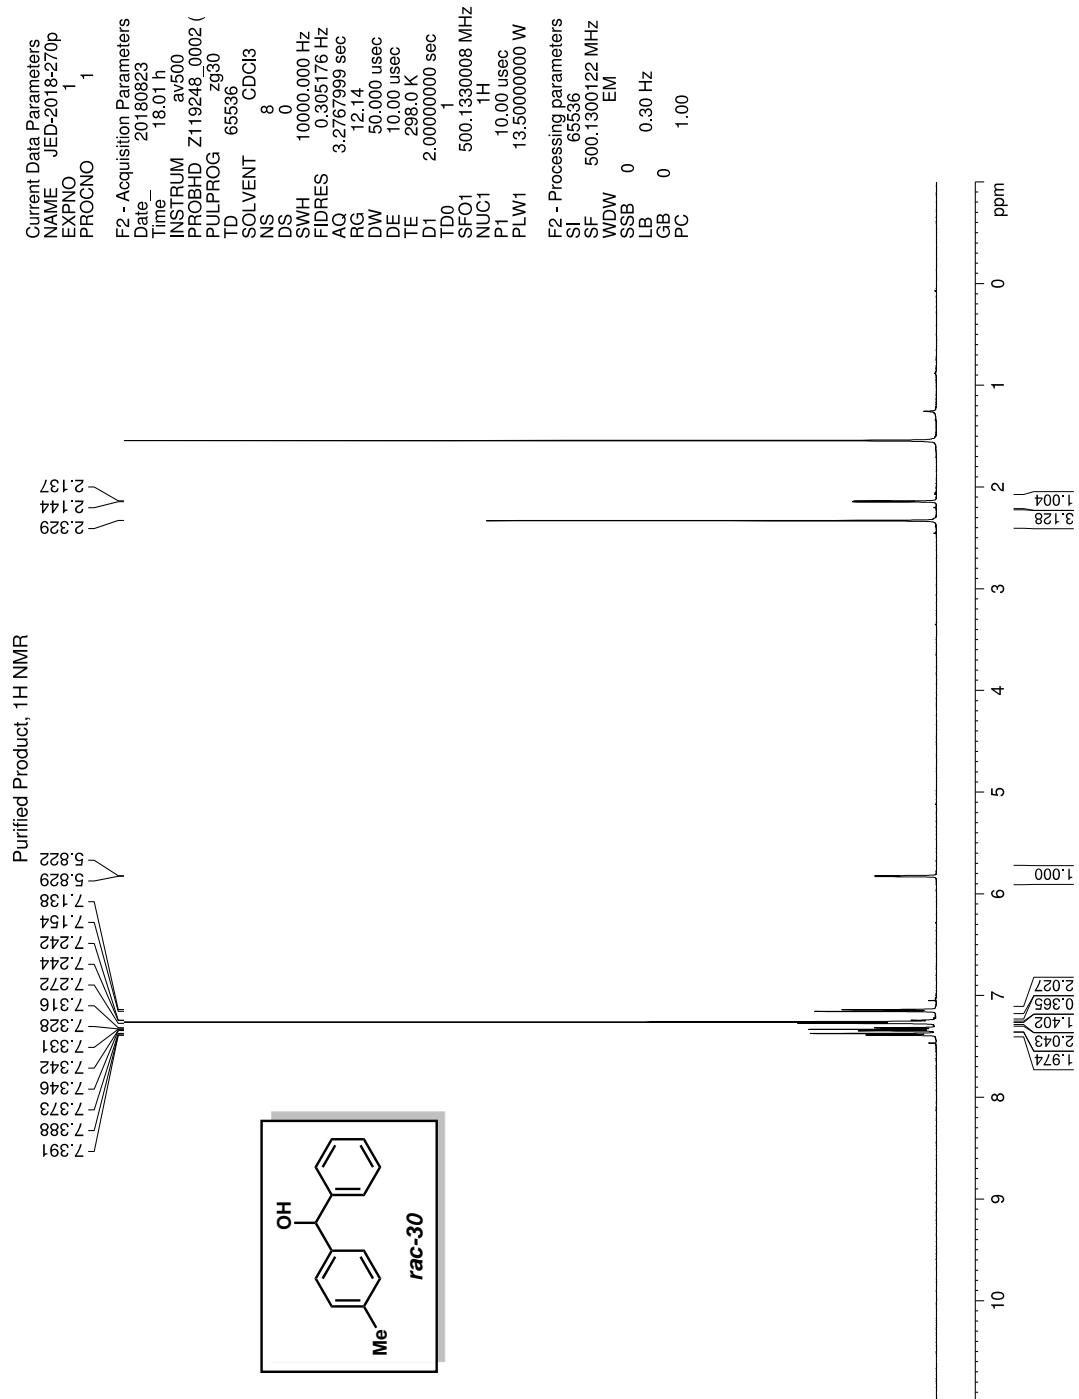

Supplementary Figure 30. <sup>1</sup>H NMR spectrum for compound *rac-30*.

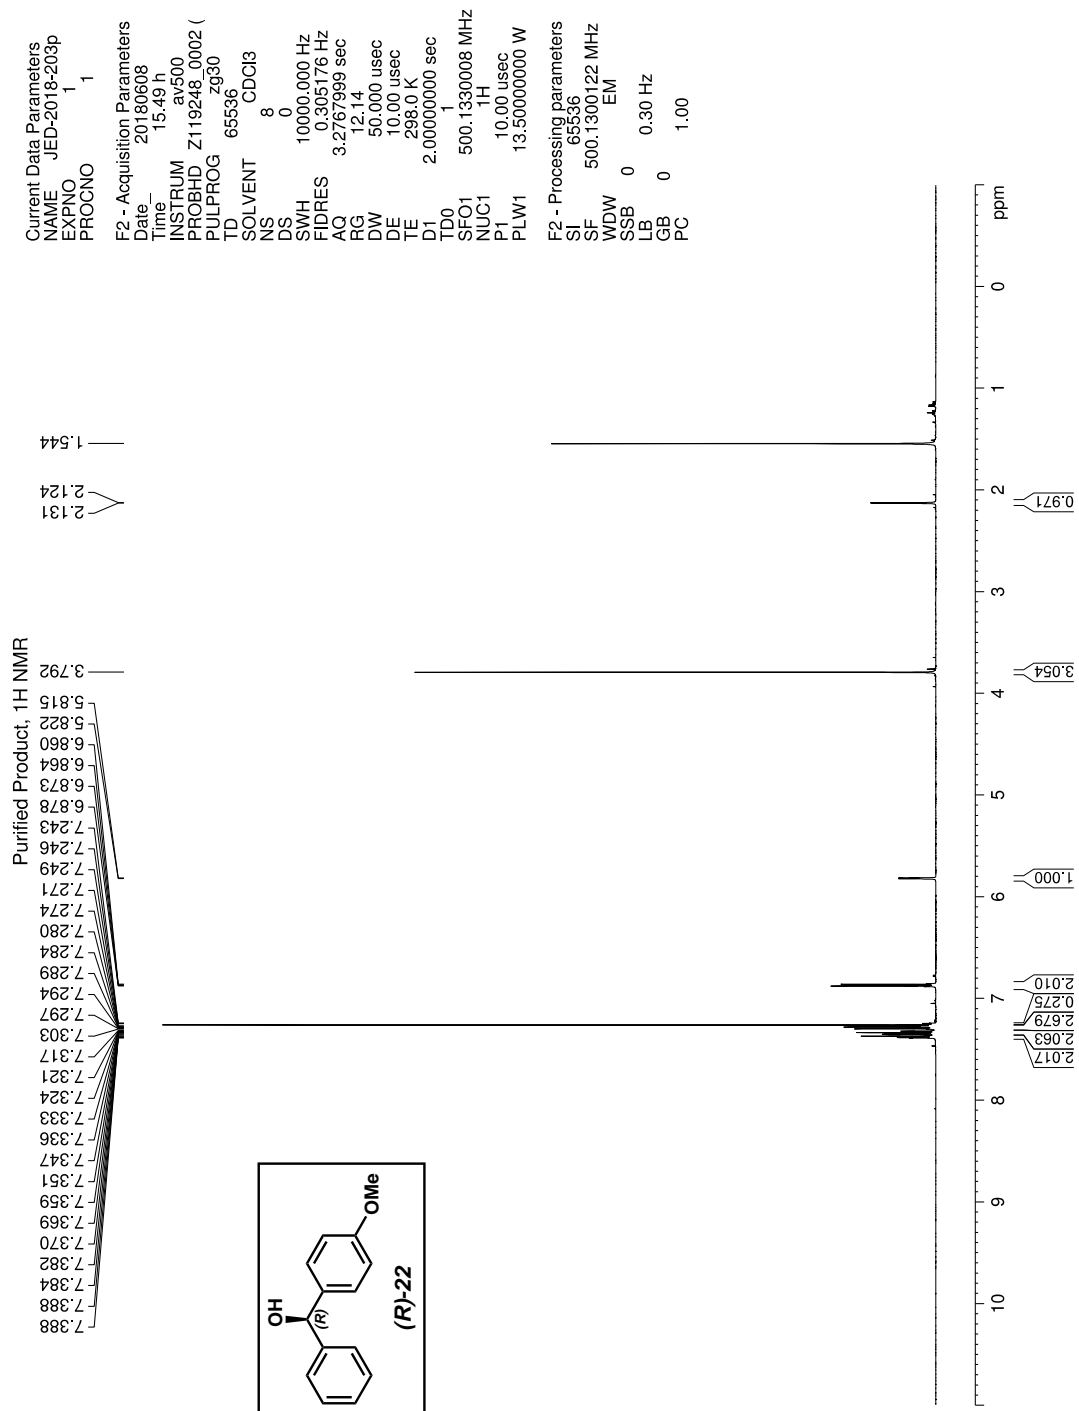

Supplementary Figure 31. <sup>1</sup>H NMR spectrum for compound (R)-22.

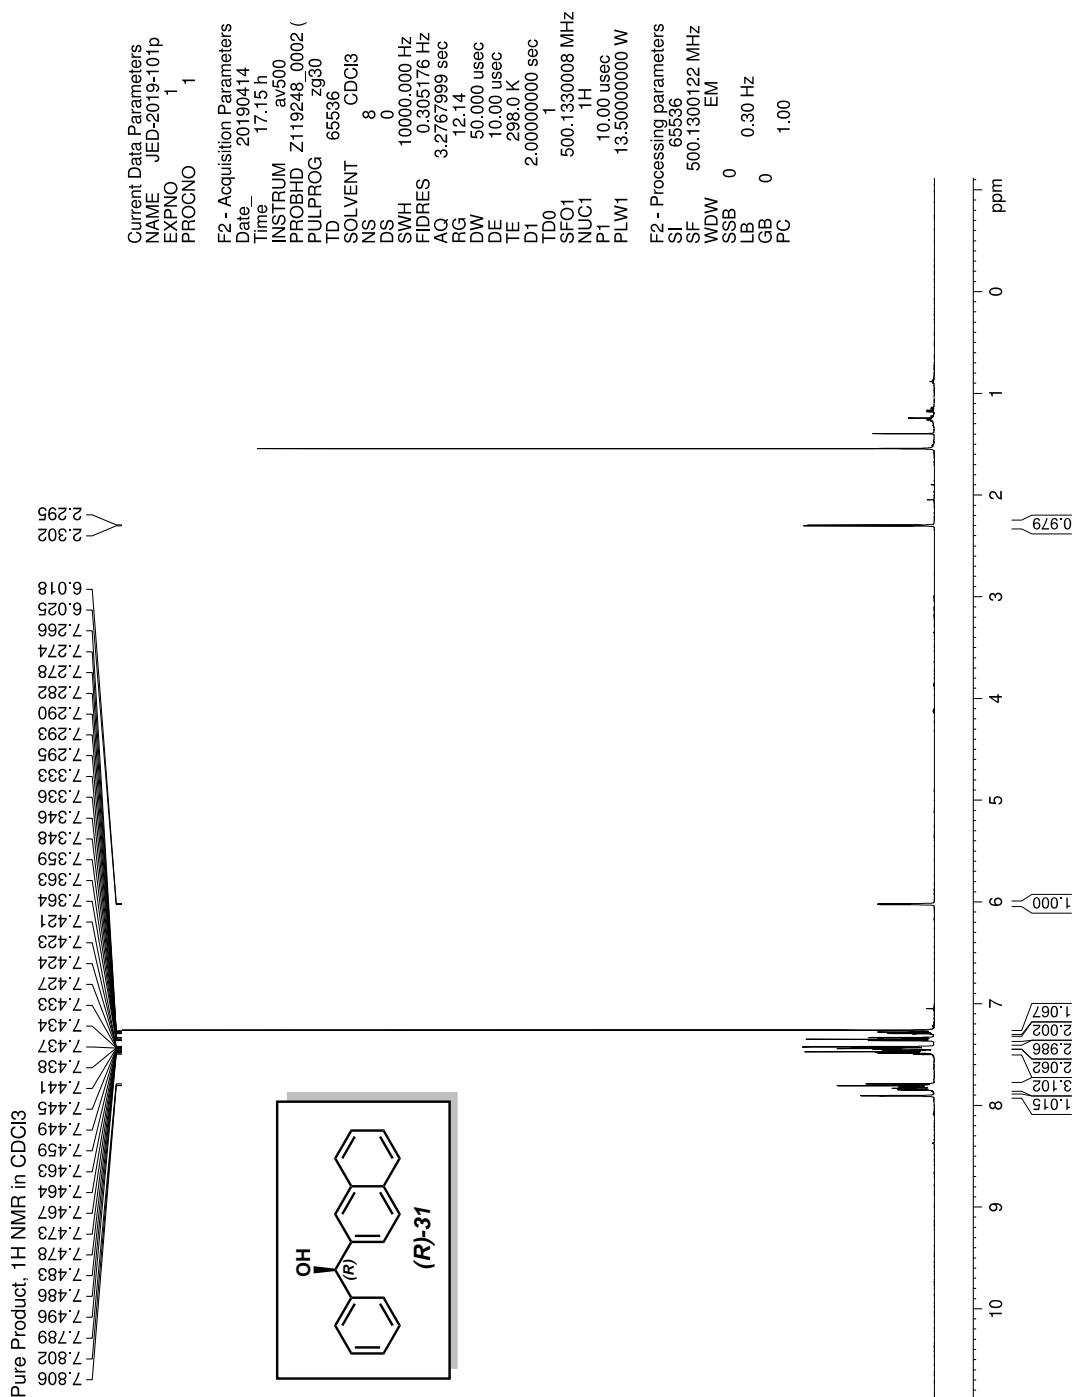

Supplementary Figure 32. <sup>1</sup>H NMR spectrum for compound (R)-31.

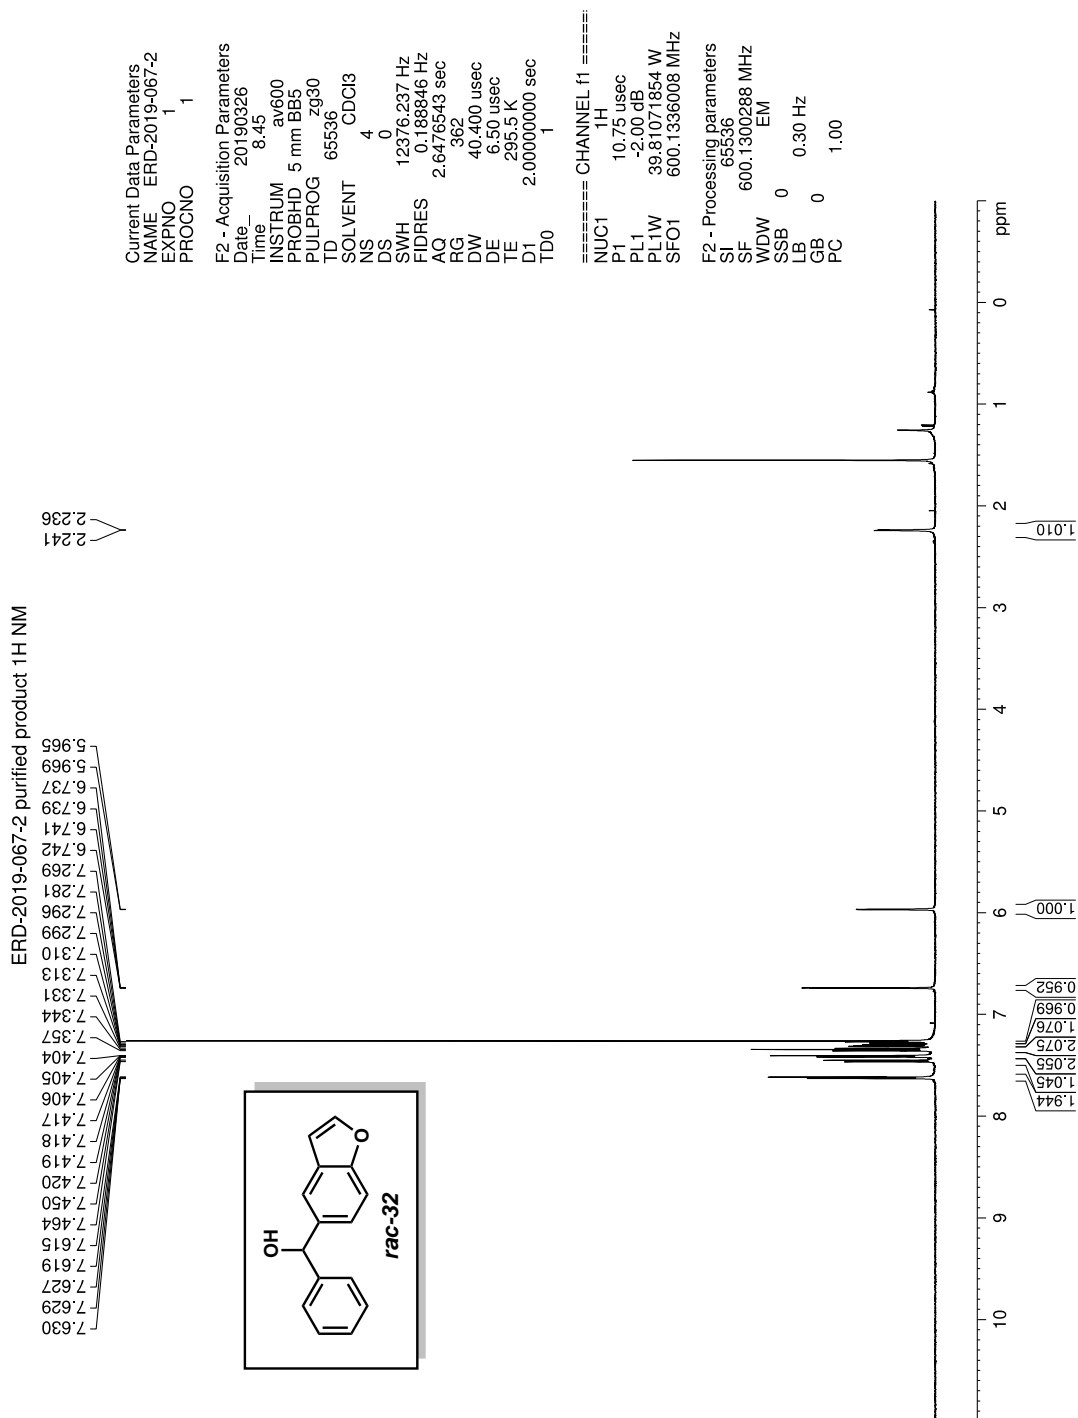

Supplementary Figure 33.  $^1\text{H}$  NMR spectrum for compound *rac-32*.

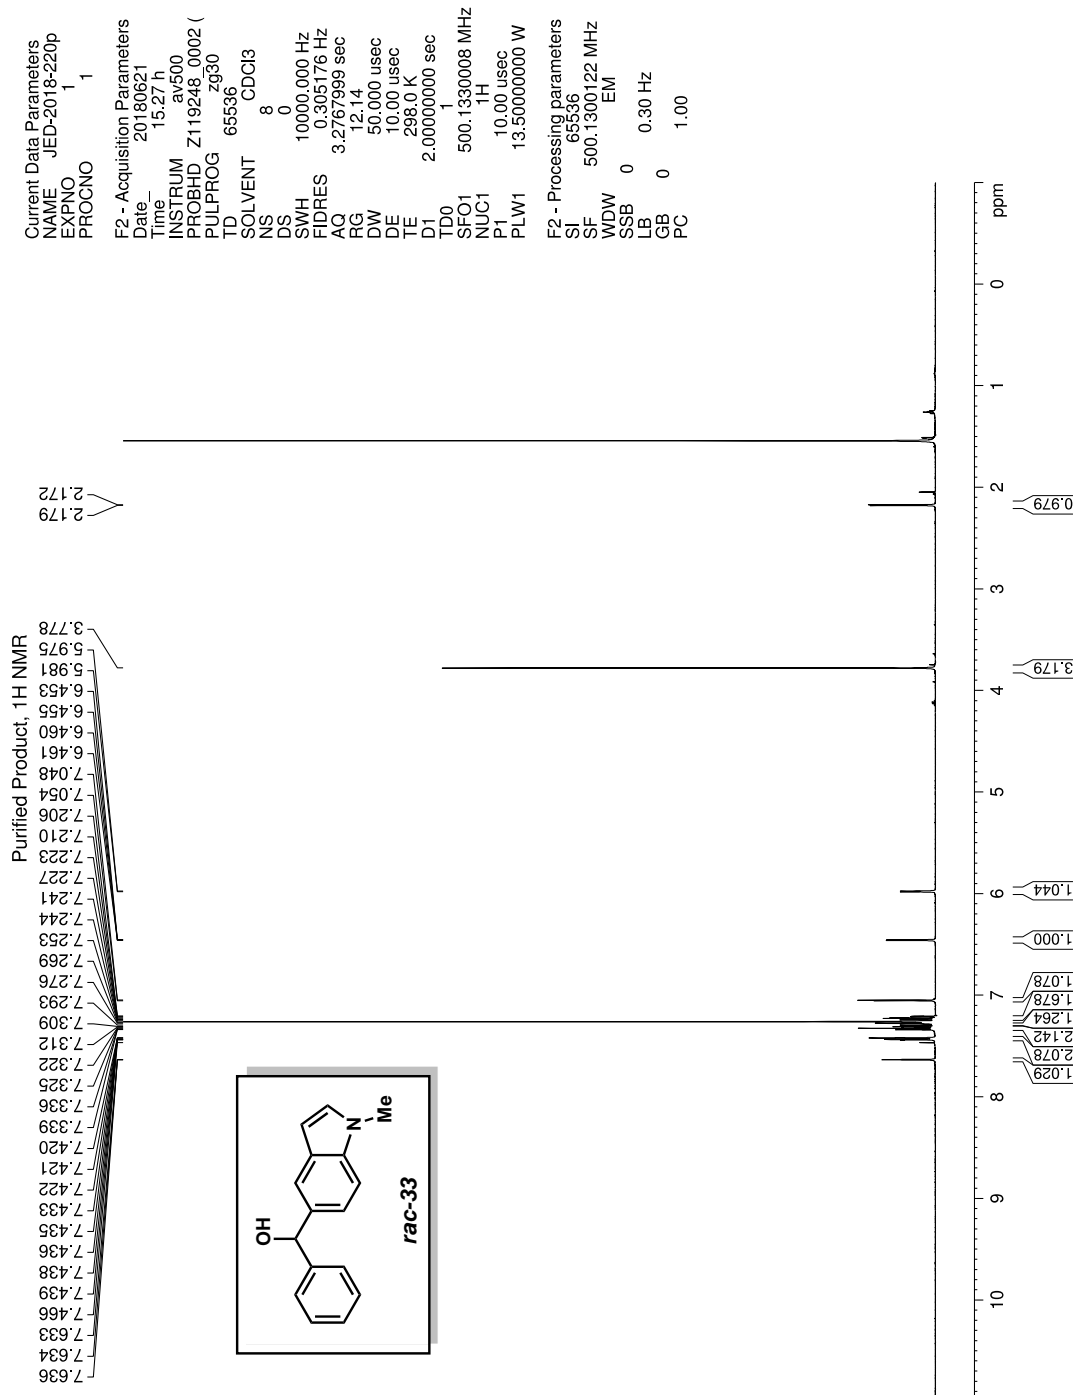

Supplementary Figure 34. <sup>1</sup>H NMR spectrum for compound *rac*-33.

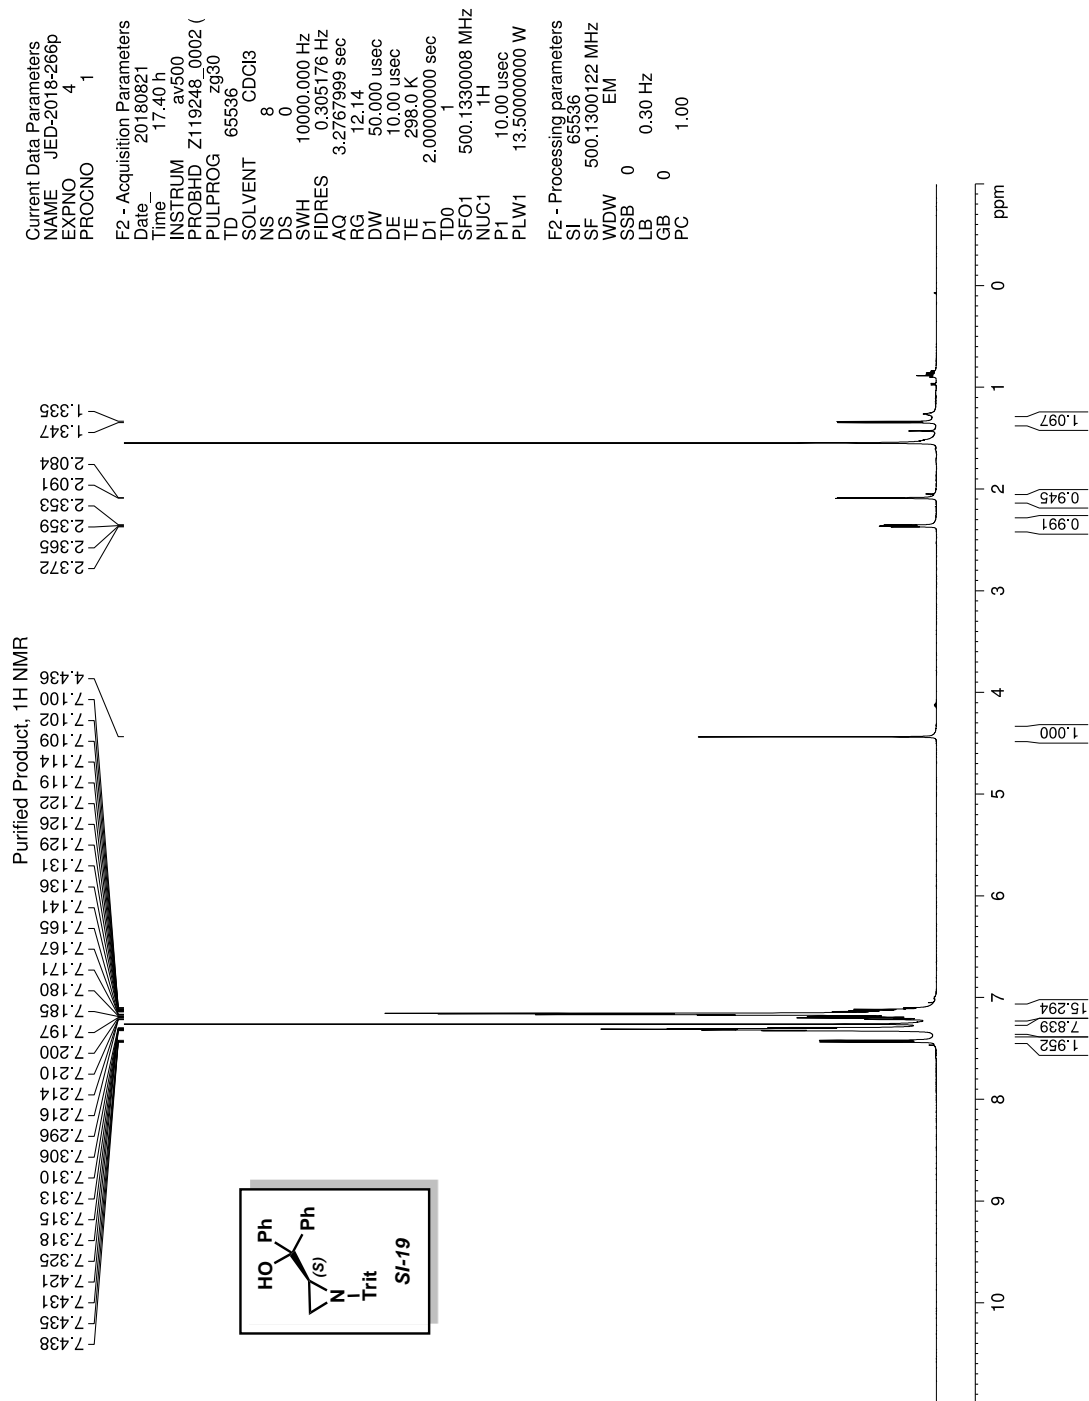

Supplementary Figure 35. <sup>1</sup>H NMR spectrum for compound SI-19.



Current Data Parameters  
NAME MG-2018-115-13C  
EXPNO 10  
PROCNO 1

F2 - Acquisition Parameters  
Date\_ 20180826  
Time\_ 18.17 h  
INSTRUM av500  
PROBHD Z119248\_0002 ( zpg930  
PULPROG zgpg30  
TD 65536  
SOLVENT CDCl3  
NS 250  
DS 2  
SWH 31250.000 Hz  
FIDRES 0.953674 Hz  
AQ 1.0485760 sec  
RG 204.54  
DW 16.000 usec  
DE 18.00 usec  
TE 298.0 K  
D1 2.00000000 sec  
D11 0.030000000 sec  
TD0 1  
SFO1 125.772511 MHz  
NUC1 13C  
P1 10.50 usec  
PLW1 23.00000000 W  
SFO2 500.1330008 MHz  
NUC2 1H  
CPDPRG2 waltz16  
PCPD2 80.00 usec  
PLW2 13.50000000 W  
PLW12 0.21094000 W  
PLW13 0.10610000 W

F2 - Processing parameters  
SI 131072  
SF 125.757721 MHz  
WDW EM  
SSB 0  
LB 1.00 Hz  
GB 0  
PC 1.40

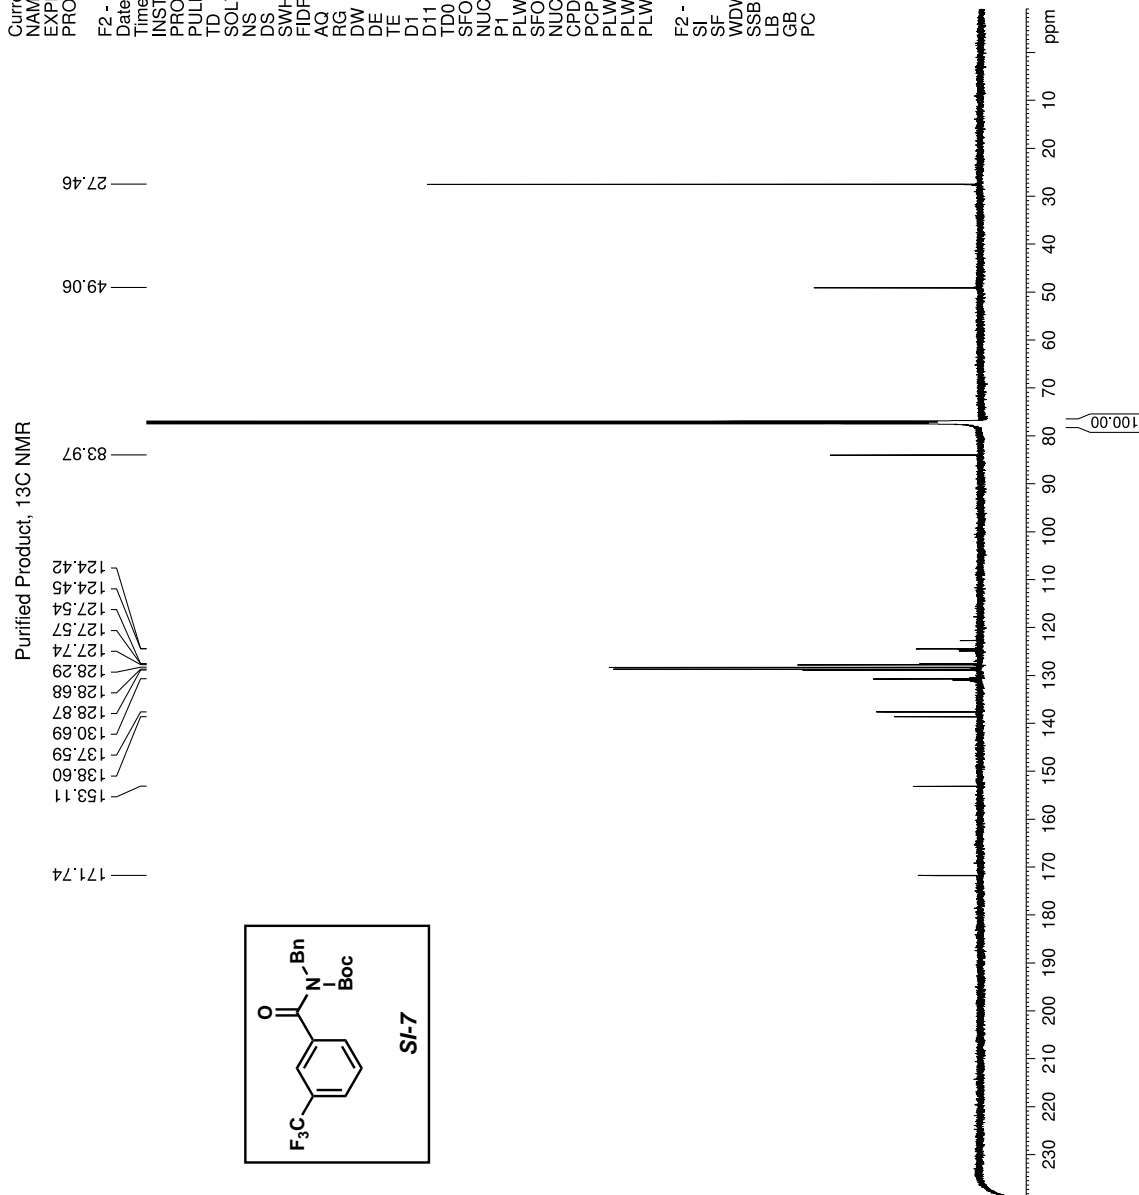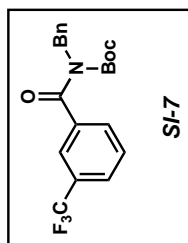

Supplementary Figure 36. <sup>13</sup>C NMR spectrum for compound SI-7.

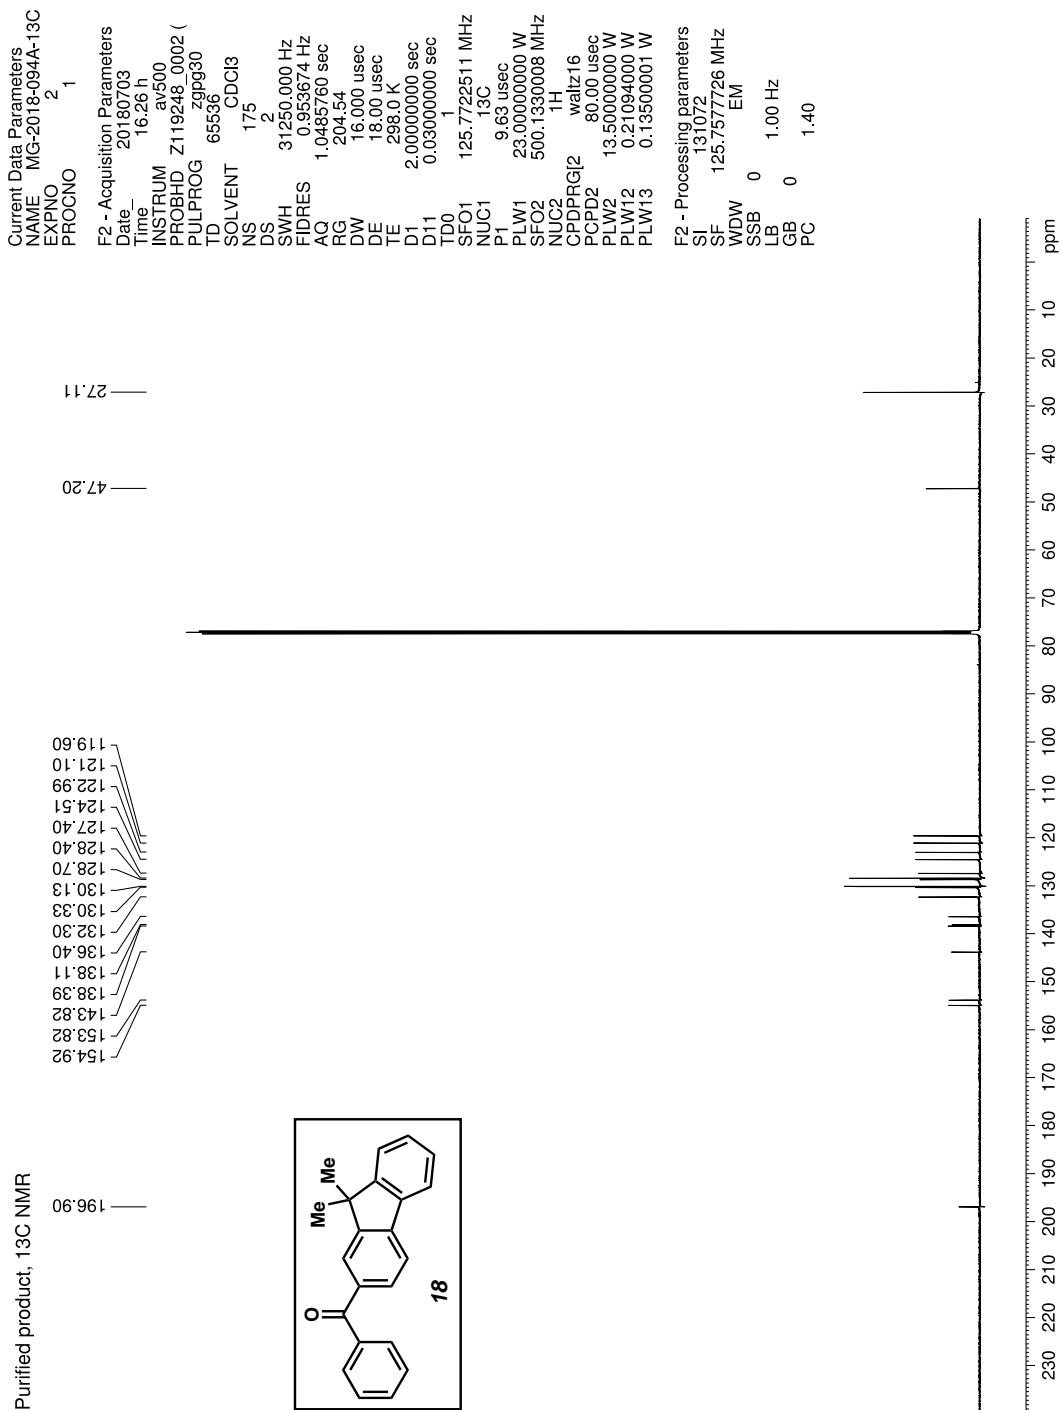

Supplementary Figure 37. <sup>13</sup>C NMR spectrum for compound **18**.

Current Data Parameters  
 NAME JED-2018-254-13C  
 EXPNO 10  
 PROCNO 1

F2 - Acquisition Parameters  
 Date\_ 20180826  
 Time\_ 18.36 h  
 INSTRUM av500  
 PROBHD Z119248\_0002 (zpgp30)  
 PULPROG zgpg30  
 TD 65536  
 SOLVENT CDCl3  
 NS 250  
 DS 2  
 SWH 31250.000 Hz  
 FIDRES 0.953674 Hz  
 AQ 1.0485760 sec  
 RG 204.54  
 DW 16.000 usec  
 DE 18.00 usec  
 TE 298.0 K  
 D1 2.00000000 sec  
 D11 0.03000000 sec  
 TD0 1  
 SFO1 125.7722511 MHz  
 NUC1 13C  
 P1 10.50 usec  
 PLW1 23.0000000 W  
 SFO2 500.1330008 MHz  
 NUC2 1H  
 CPDPRG2 waltz16  
 PCPD2 80.00 usec  
 PLW2 13.5000000 W  
 PLW12 0.2109400 W  
 PLW13 0.1061000 W

F2 - Processing parameters  
 SI 131072  
 SF 125.757723 MHz  
 WDW EM  
 SSB 0  
 LB 1.00 Hz  
 GB 0  
 PC 1.40

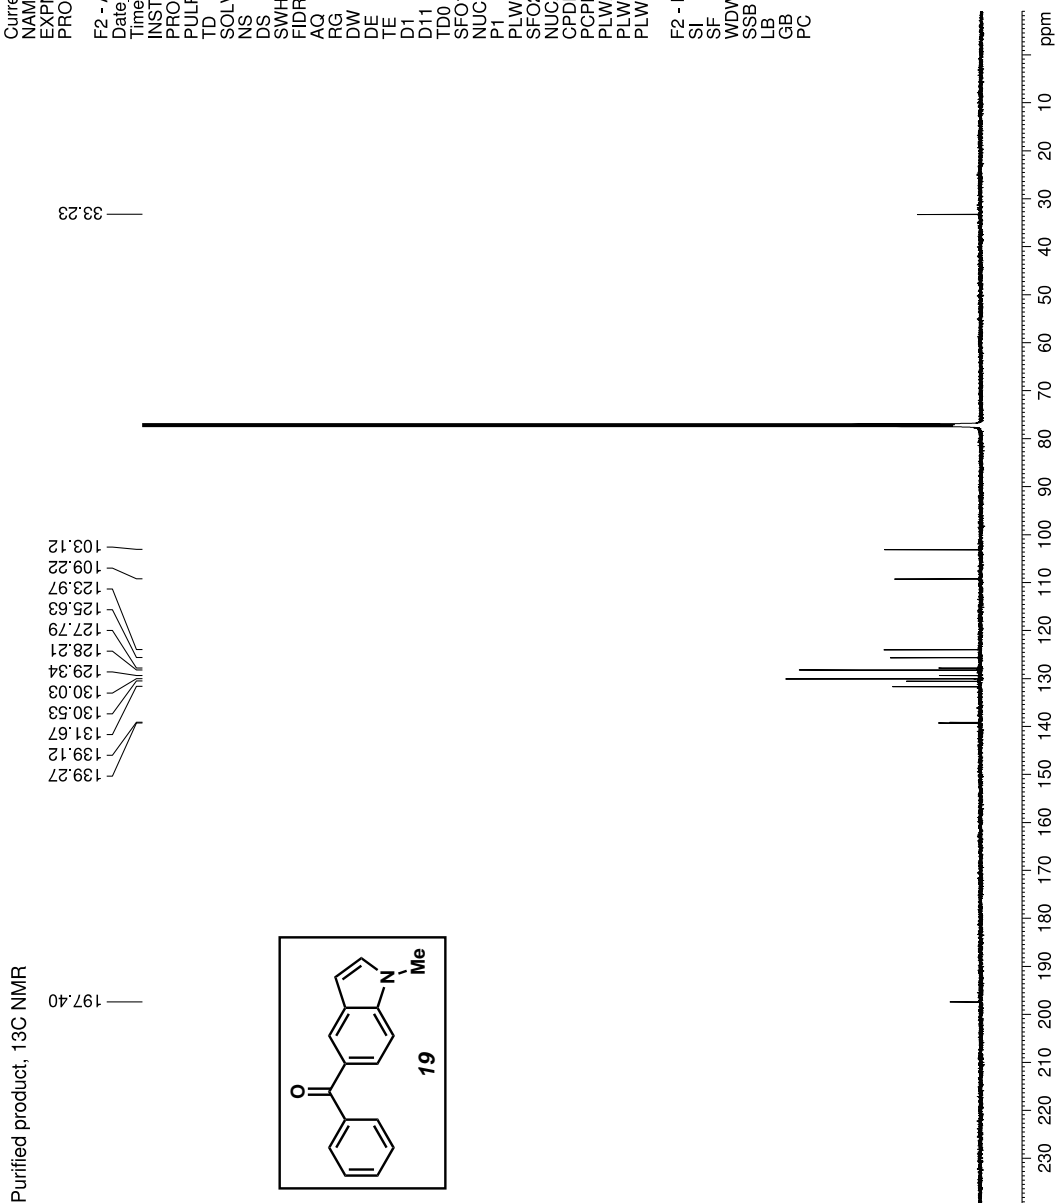

Supplementary Figure 38. <sup>13</sup>C NMR spectrum for compound **19**.

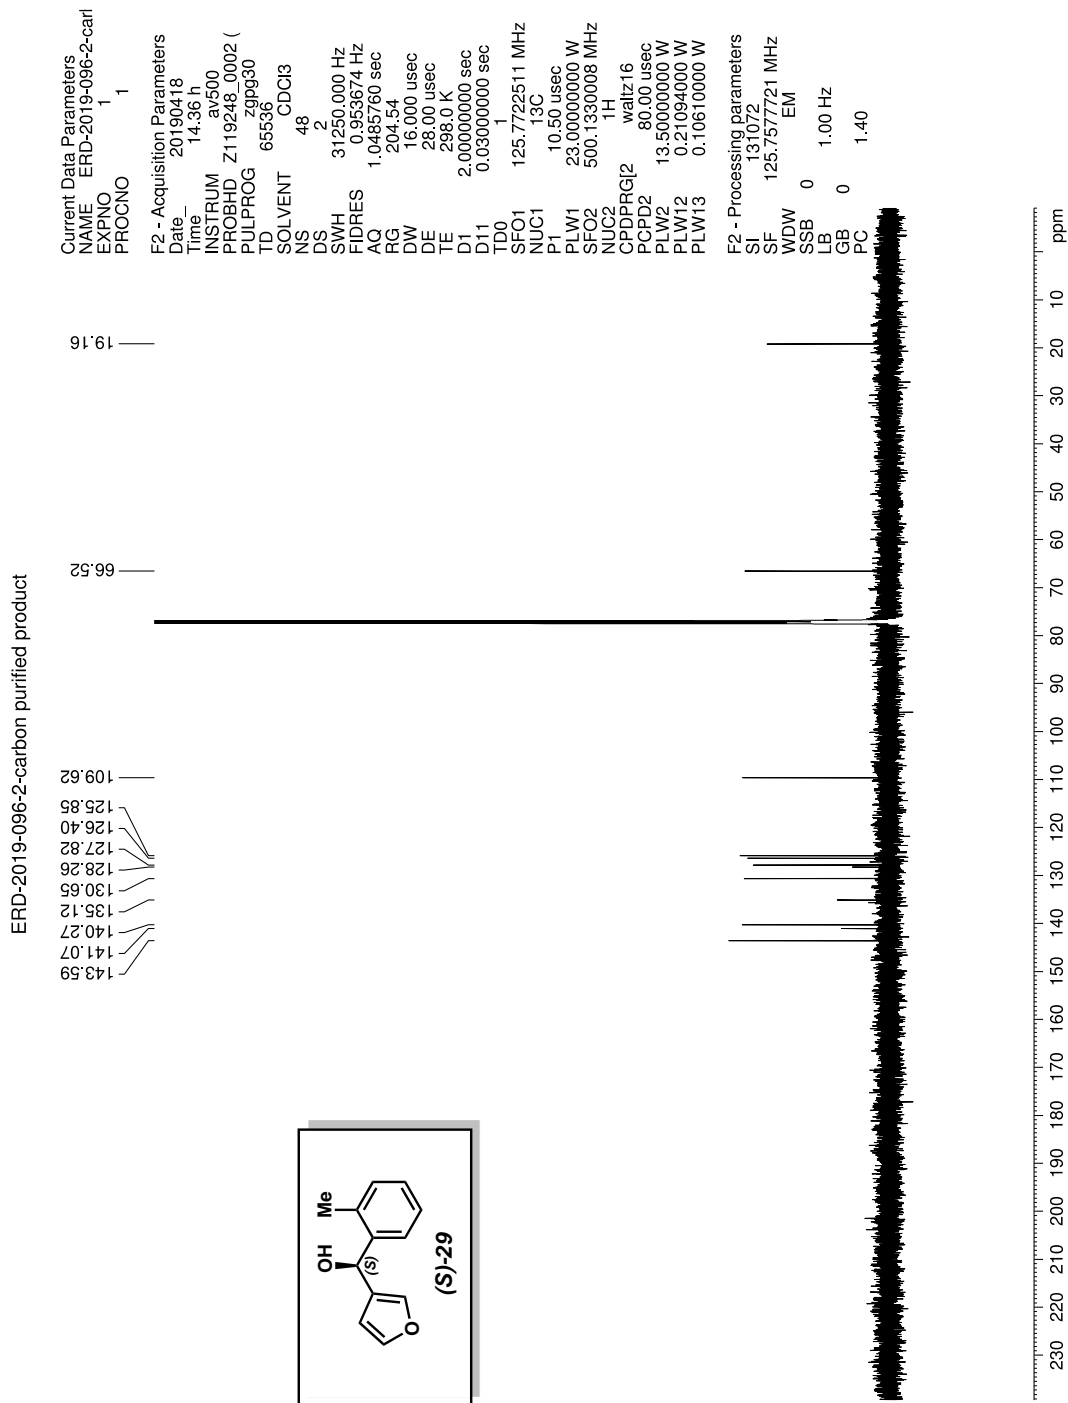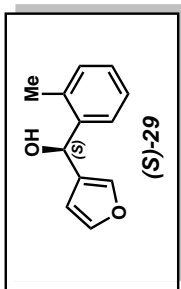

Supplementary Figure 39.  $^{13}\text{C}$  NMR spectrum for compound (S)-29.

Purified Product, <sup>13</sup>C NMR in CDCl<sub>3</sub>

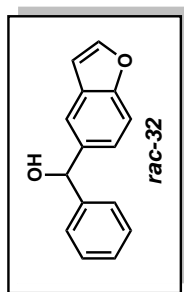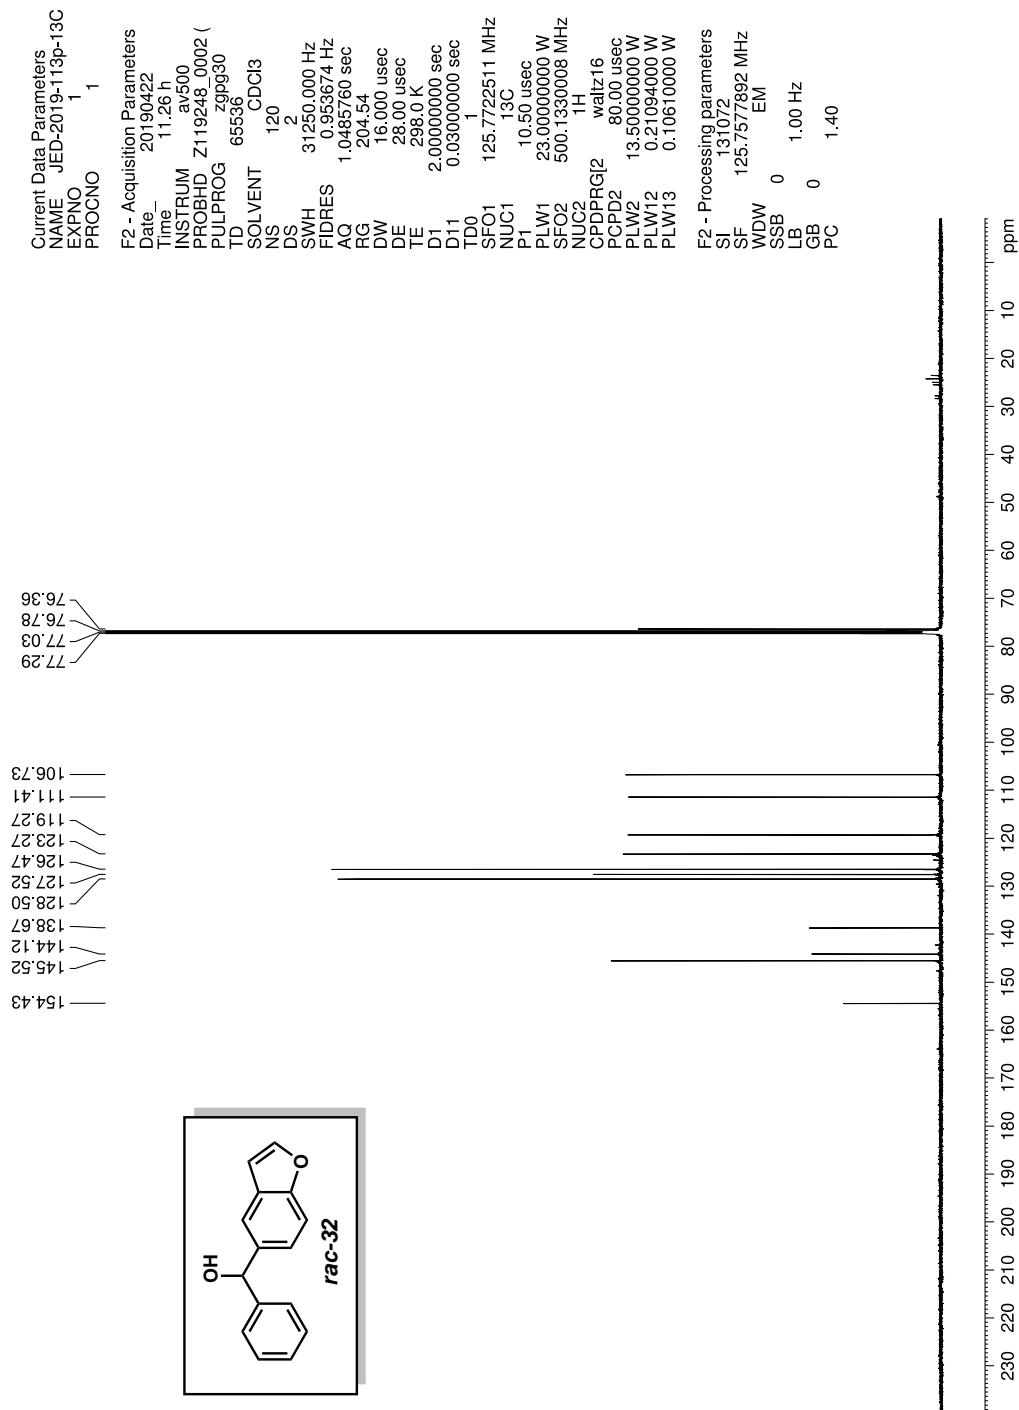

Supplementary Figure 40. <sup>13</sup>C NMR spectrum for compound *rac-32*.

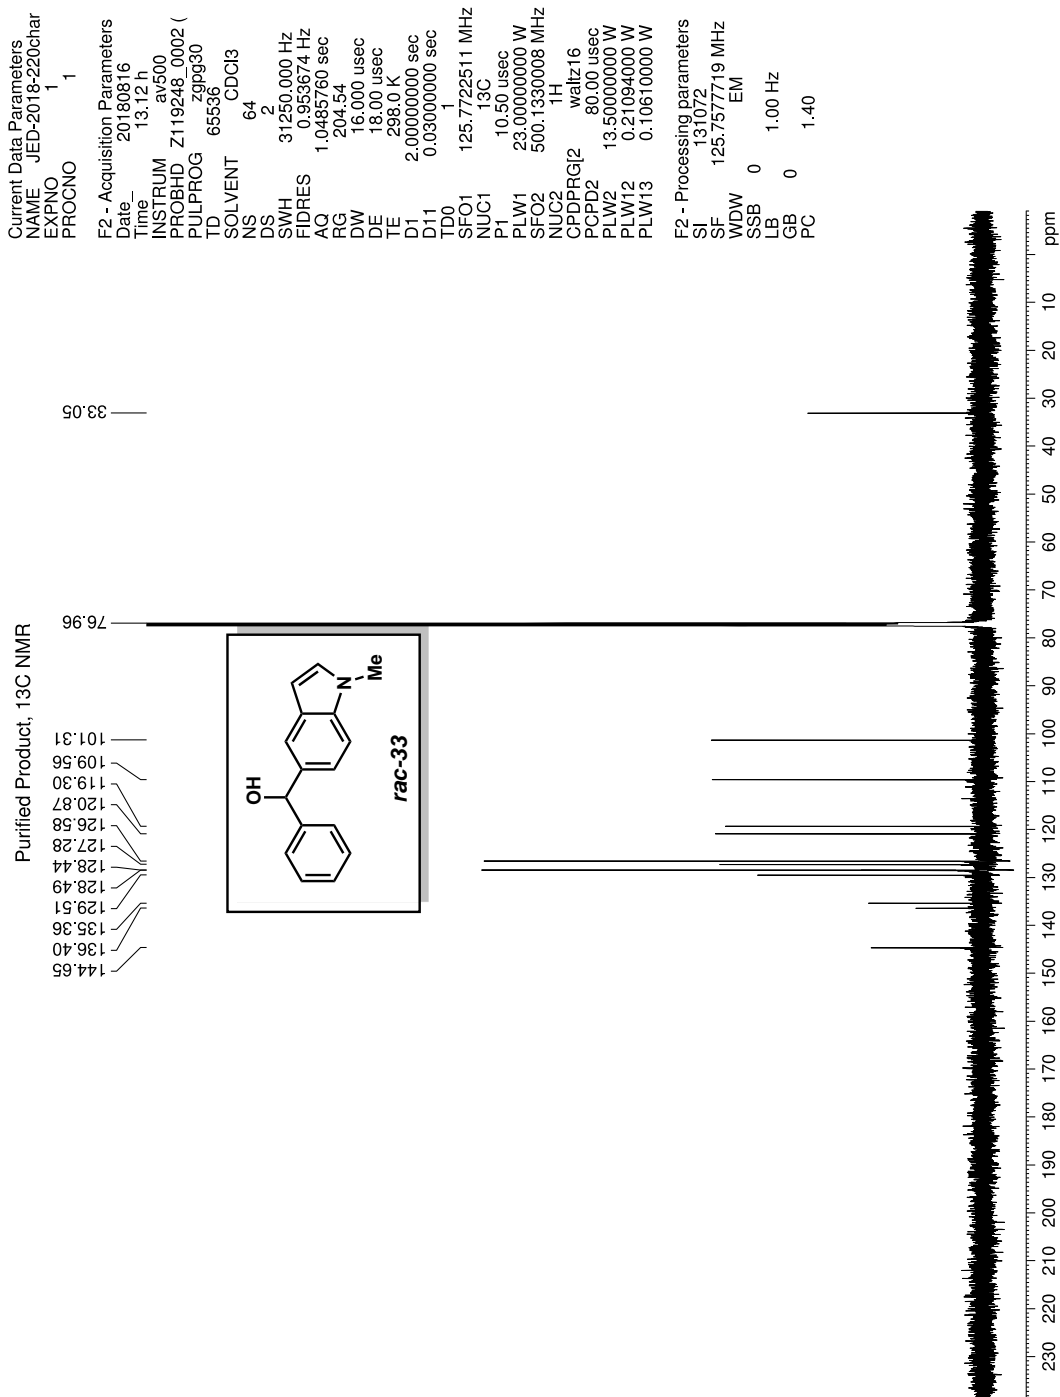

Supplementary Figure 41. <sup>13</sup>C NMR spectrum for compound *rac-33*.

SFC Traces from Figure 2 and Supplementary Table 2: Evaluation of KREDs in the reduction of ketones **14** and **16**.

Supplementary Figure 42. SFC Trace of *rac*-**21**

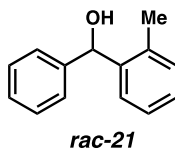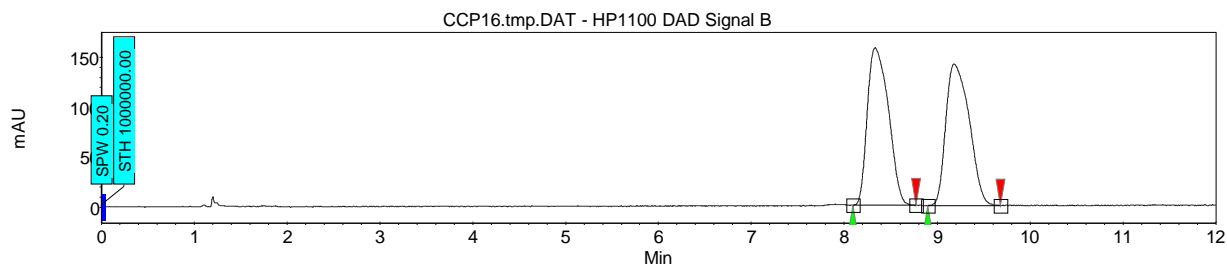

| Index | Name    | Start [Min] | Time [Min] | End [Min] | RT Offset [Min] | Quantity [% Area] | Height [μV] | Area [μV.Min] | Area [%] |
|-------|---------|-------------|------------|-----------|-----------------|-------------------|-------------|---------------|----------|
| 1     | UNKNOWN | 8.09        | 8.33       | 8.77      | 0.00            | 50.05             | 157.1       | 41.3          | 50.050   |
| 2     | UNKNOWN | 8.90        | 9.18       | 9.68      | 0.00            | 49.95             | 141.4       | 41.2          | 49.950   |
| Total |         |             |            |           |                 | 100.00            | 298.5       | 82.5          | 100.000  |

Supplementary Figure 43. SFC trace of (*S*)-**21** (Supplementary Table 2, Entry 1)

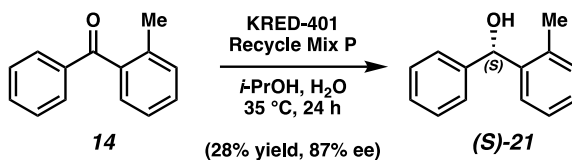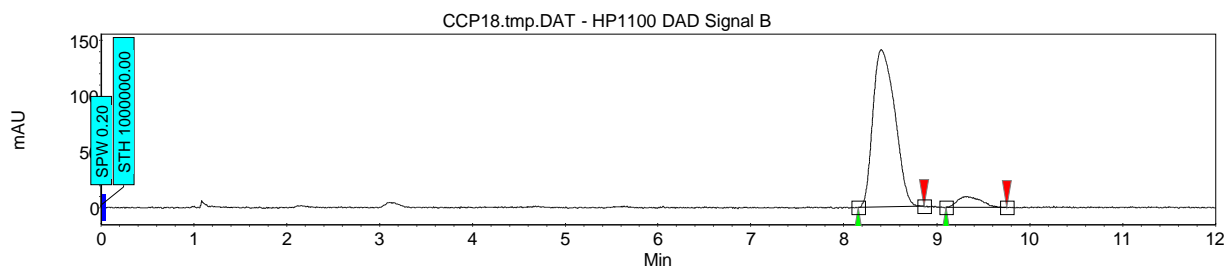

| Index | Name    | Start [Min] | Time [Min] | End [Min] | RT Offset [Min] | Quantity [% Area] | Height [μV] | Area [μV.Min] | Area [%] |
|-------|---------|-------------|------------|-----------|-----------------|-------------------|-------------|---------------|----------|
| 1     | UNKNOWN | 8.15        | 8.40       | 8.86      | 0.00            | 93.30             | 140.8       | 38.5          | 93.302   |
| 2     | UNKNOWN | 9.10        | 9.33       | 9.76      | 0.00            | 6.70              | 9.7         | 2.8           | 6.698    |
| Total |         |             |            |           |                 | 100.00            | 150.5       | 41.2          | 100.000  |

Supplementary Figure 44. SFC trace of (*S*)-21 (Supplementary Table 2, Entry 2)

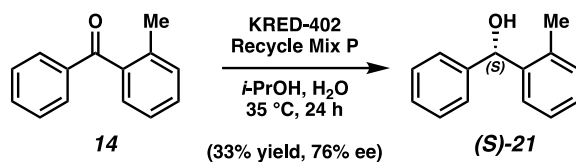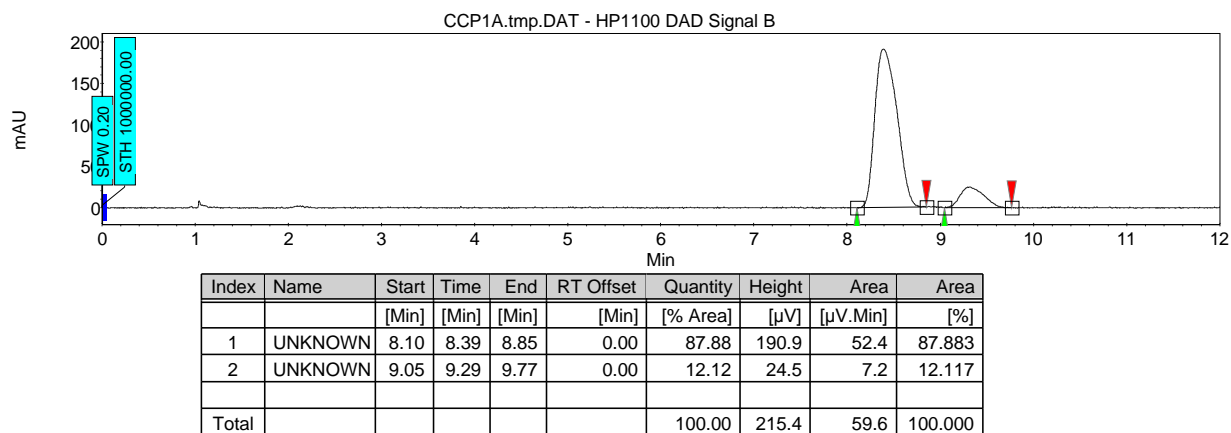

Supplementary Figure 45. SFC trace of (*S*)-21 (Supplementary Table 2, Entry 3)

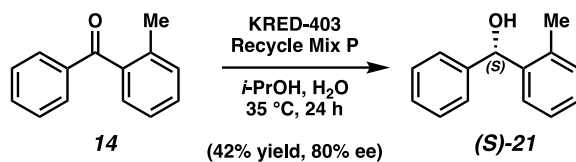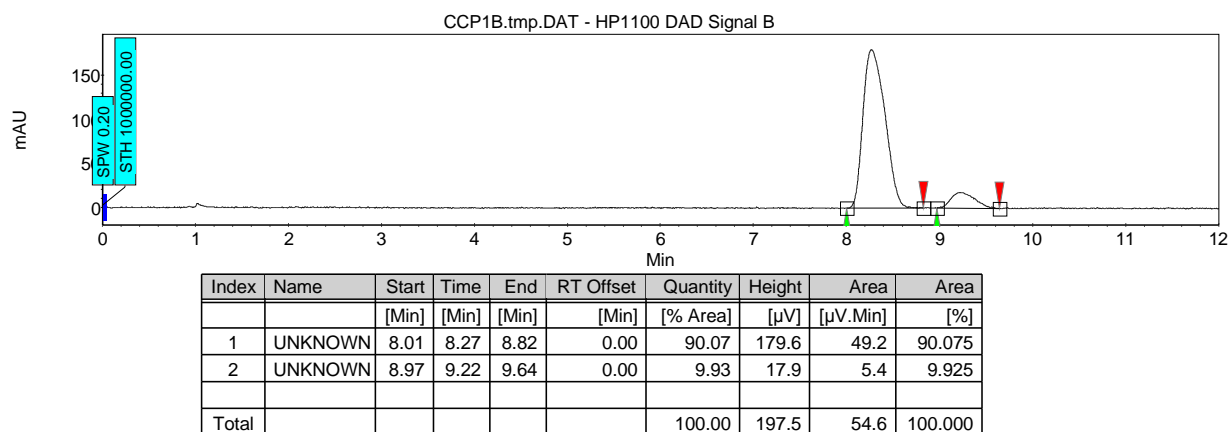



Supplementary Figure 46. SFC trace of (*S*)-21 (Supplementary Table 2, Entry 4)

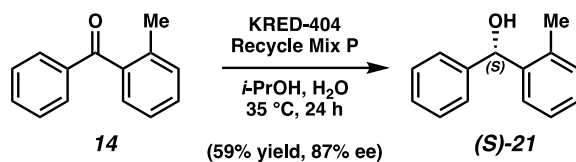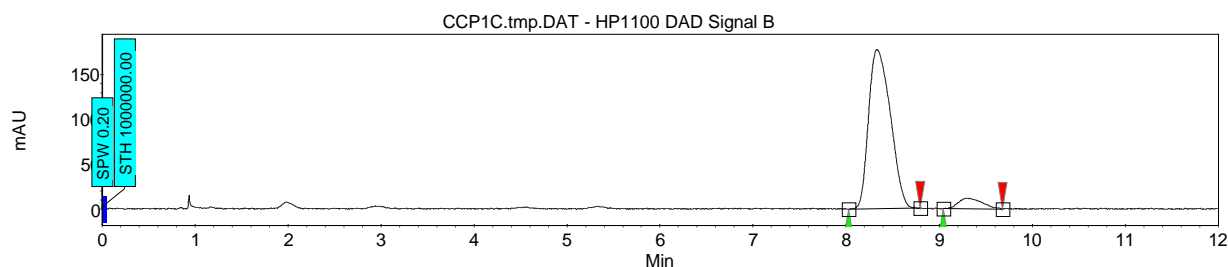

| Index | Name    | Start | Time  | End   | RT Offset | Quantity | Height     | Area           | Area    |
|-------|---------|-------|-------|-------|-----------|----------|------------|----------------|---------|
|       |         | [Min] | [Min] | [Min] | [Min]     | [% Area] | [ $\mu$ V] | [ $\mu$ V.Min] | [%]     |
| 1     | UNKNOWN | 8.03  | 8.33  | 8.80  | 0.00      | 93.33    | 176.7      | 47.9           | 93.331  |
| 2     | UNKNOWN | 9.05  | 9.31  | 9.68  | 0.00      | 6.67     | 11.6       | 3.4            | 6.669   |
| Total |         |       |       |       |           | 100.00   | 188.4      | 51.4           | 100.000 |

Supplementary Figure 47. SFC trace of (*R*)-21 (Supplementary Table 2, Entry 5)

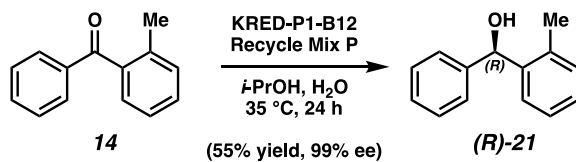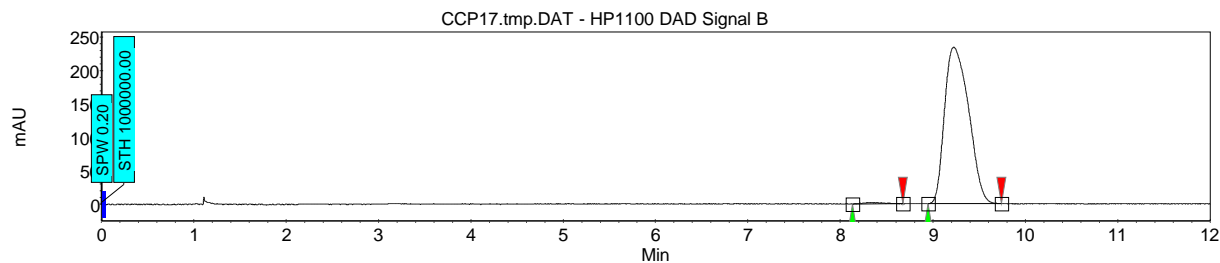

| Index | Name    | Start | Time  | End   | RT Offset | Quantity | Height     | Area           | Area    |
|-------|---------|-------|-------|-------|-----------|----------|------------|----------------|---------|
|       |         | [Min] | [Min] | [Min] | [Min]     | [% Area] | [ $\mu$ V] | [ $\mu$ V.Min] | [%]     |
| 1     | UNKNOWN | 8.13  | 8.35  | 8.68  | 0.00      | 0.72     | 2.2        | 0.5            | 0.720   |
| 2     | UNKNOWN | 8.95  | 9.23  | 9.74  | 0.00      | 99.28    | 233.7      | 70.6           | 99.280  |
| Total |         |       |       |       |           | 100.00   | 235.9      | 71.1           | 100.000 |

Supplementary Figure 48. SFC Trace of *rac*-22

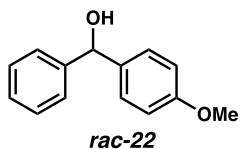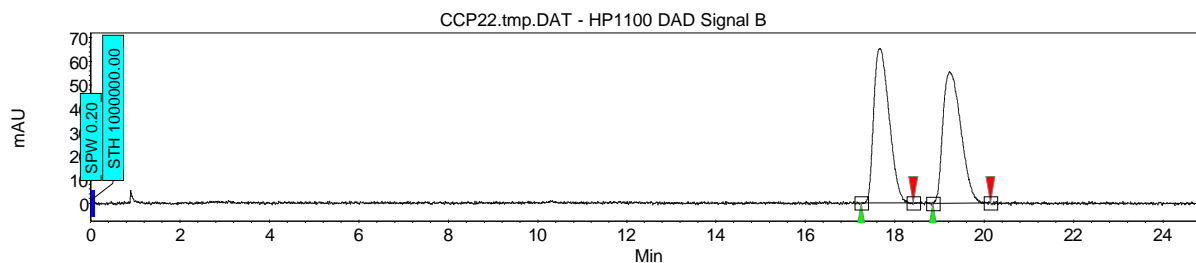

| Index | Name    | Start [Min] | Time [Min] | End [Min] | RT Offset [Min] | Quantity [% Area] | Height [μV] | Area [μV.Min] | Area [%] |
|-------|---------|-------------|------------|-----------|-----------------|-------------------|-------------|---------------|----------|
| 1     | UNKNOWN | 17.25       | 17.67      | 18.41     | 0.00            | 50.12             | 65.4        | 26.0          | 50.119   |
| 2     | UNKNOWN | 18.85       | 19.22      | 20.14     | 0.00            | 49.88             | 55.7        | 25.9          | 49.881   |
| Total |         |             |            |           |                 | 100.00            | 121.1       | 51.8          | 100.000  |

Supplementary Figure 49. SFC trace of (*R*)-22 (Supplementary Table 2, Entry 6)

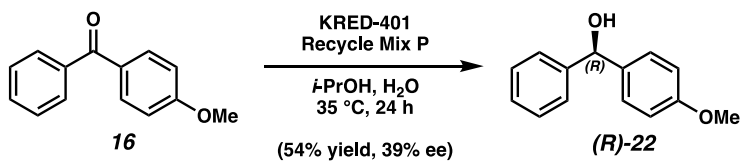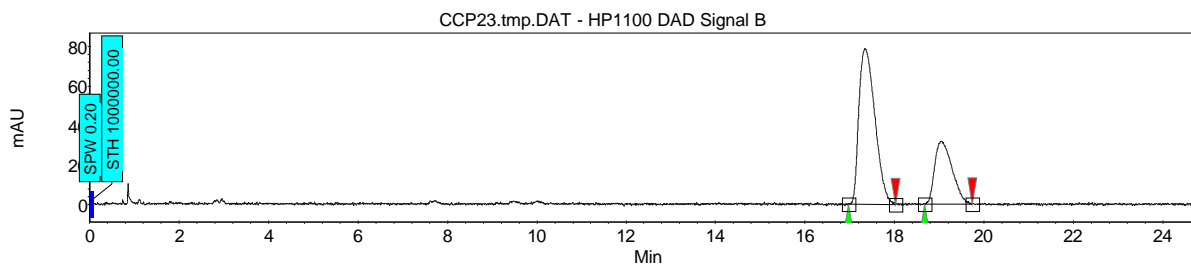

| Index | Name    | Start [Min] | Time [Min] | End [Min] | RT Offset [Min] | Quantity [% Area] | Height [μV] | Area [μV.Min] | Area [%] |
|-------|---------|-------------|------------|-----------|-----------------|-------------------|-------------|---------------|----------|
| 1     | UNKNOWN | 16.98       | 17.34      | 18.02     | 0.00            | 69.42             | 79.1        | 32.8          | 69.418   |
| 2     | UNKNOWN | 18.68       | 19.05      | 19.73     | 0.00            | 30.58             | 32.1        | 14.4          | 30.582   |
| Total |         |             |            |           |                 | 100.00            | 111.1       | 47.2          | 100.000  |

Supplementary Figure 50. SFC trace of (*R*)-22 (Supplementary Table 2, Entry 7)

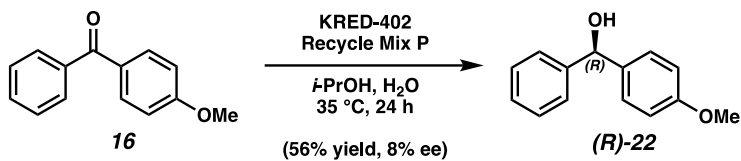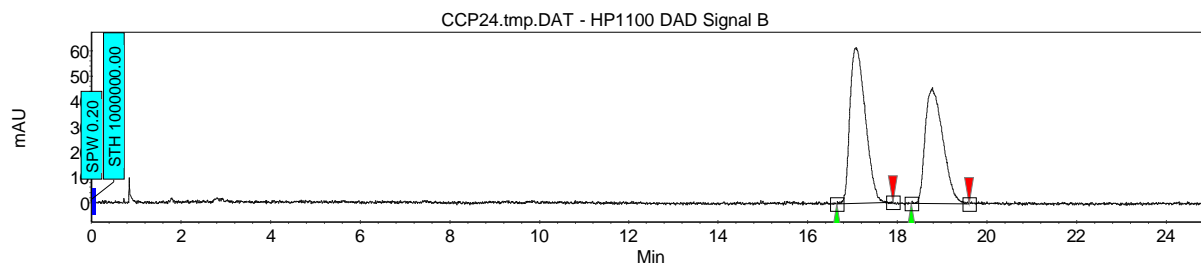

| Index | Name    | Start [Min] | Time [Min] | End [Min] | RT Offset [Min] | Quantity [% Area] | Height [μV] | Area [μV.Min] | Area [%] |
|-------|---------|-------------|------------|-----------|-----------------|-------------------|-------------|---------------|----------|
| 1     | UNKNOWN | 16.65       | 17.08      | 17.89     | 0.00            | 54.08             | 61.4        | 24.5          | 54.078   |
| 2     | UNKNOWN | 18.31       | 18.78      | 19.60     | 0.00            | 45.92             | 45.8        | 20.8          | 45.922   |
| Total |         |             |            |           |                 | 100.00            | 107.3       | 45.4          | 100.000  |

Supplementary Figure 51. SFC trace of (*R*)-22 (Supplementary Table 2, Entry 8)

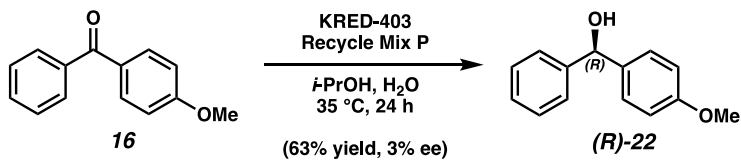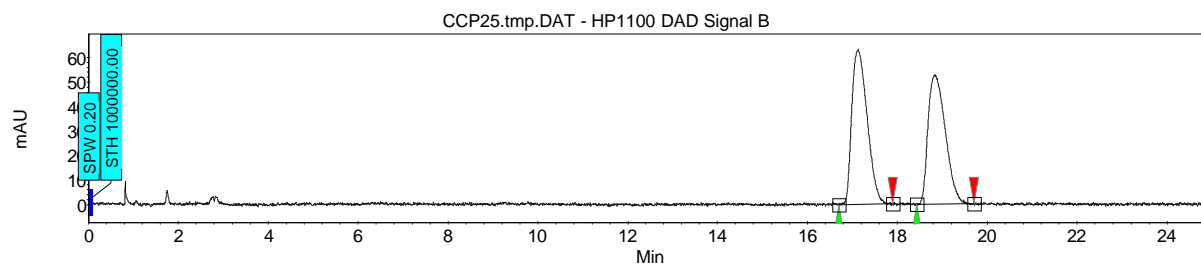

| Index | Name    | Start [Min] | Time [Min] | End [Min] | RT Offset [Min] | Quantity [% Area] | Height [μV] | Area [μV.Min] | Area [%] |
|-------|---------|-------------|------------|-----------|-----------------|-------------------|-------------|---------------|----------|
| 1     | UNKNOWN | 16.70       | 17.13      | 17.89     | 0.00            | 51.46             | 63.2        | 25.0          | 51.462   |
| 2     | UNKNOWN | 18.43       | 18.85      | 19.70     | 0.00            | 48.54             | 52.9        | 23.6          | 48.538   |
| Total |         |             |            |           |                 | 100.00            | 116.1       | 48.6          | 100.000  |

Supplementary Figure 52. SFC trace of (S)-22 (Supplementary Table 2, Entry 9)

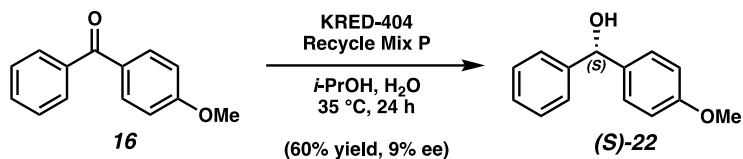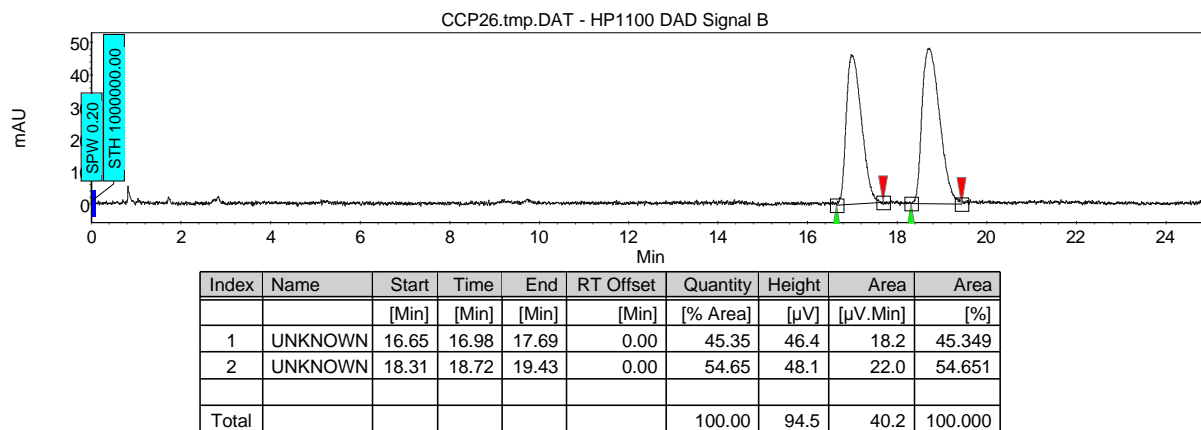

Supplementary Figure 53. SFC trace of (S)-22 (Supplementary Table 2, Entry 10)

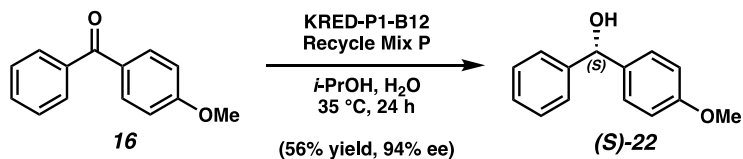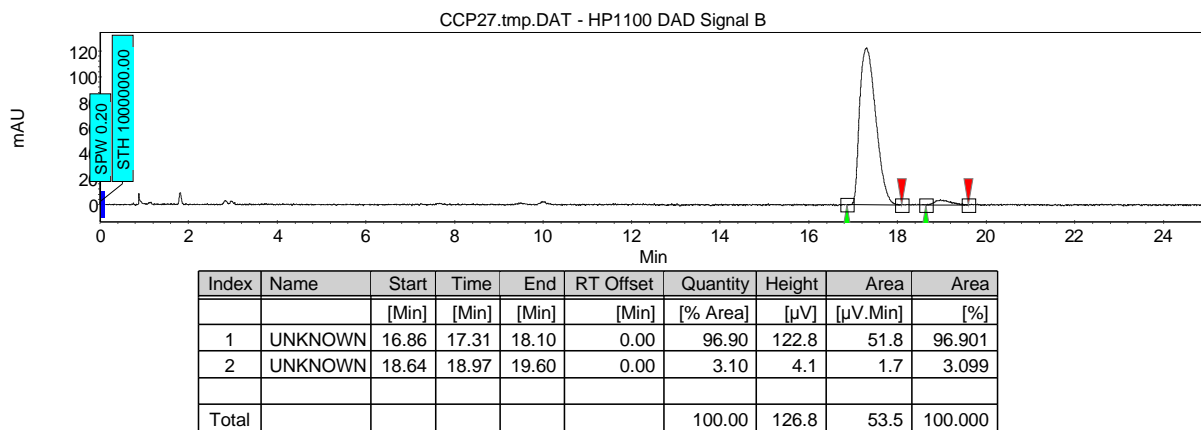

SFC Traces from Figures 3 and 4a, and Section Gii of the Experimental Procedures: One-pot isolation and asymmetric arylation experiments.  
**Supplementary Figure 54. SFC Trace of *rac*-25**

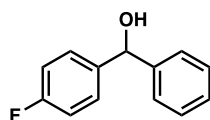

***rac*-25**

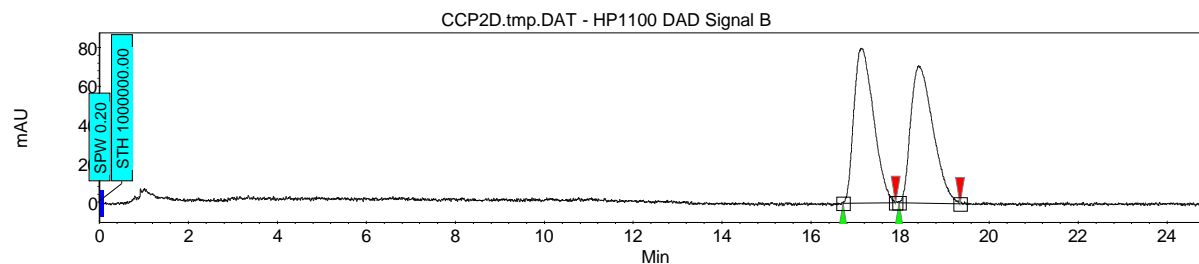

| Index | Name    | Start [Min] | Time [Min] | End [Min] | RT Offset [Min] | Quantity [% Area] | Height [μV] | Area [μV.Min] | Area [%] |
|-------|---------|-------------|------------|-----------|-----------------|-------------------|-------------|---------------|----------|
| 1     | UNKNOWN | 16.72       | 17.12      | 17.89     | 0.00            | 49.84             | 80.3        | 41.1          | 49.837   |
| 2     | UNKNOWN | 17.97       | 18.41      | 19.35     | 0.00            | 50.16             | 71.3        | 41.3          | 50.163   |
| Total |         |             |            |           |                 | 100.00            | 151.6       | 82.4          | 100.000  |

**Supplementary Figure 55. SFC Trace of (*R*)-25**

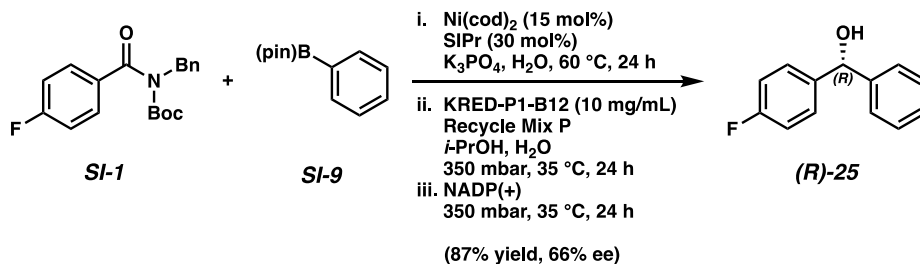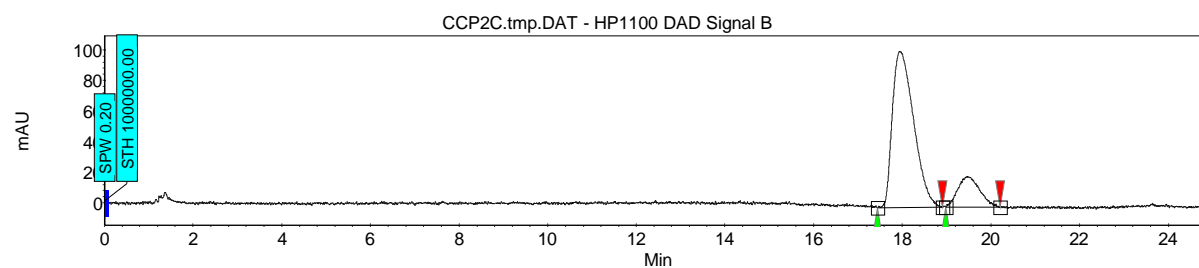

| Index | Name    | Start [Min] | Time [Min] | End [Min] | RT Offset [Min] | Quantity [% Area] | Height [μV] | Area [μV.Min] | Area [%] |
|-------|---------|-------------|------------|-----------|-----------------|-------------------|-------------|---------------|----------|
| 1     | UNKNOWN | 17.45       | 17.93      | 18.91     | 0.00            | 82.82             | 102.0       | 56.7          | 82.821   |
| 2     | UNKNOWN | 18.98       | 19.47      | 20.20     | 0.00            | 17.18             | 20.4        | 11.8          | 17.179   |
| Total |         |             |            |           |                 | 100.00            | 122.4       | 68.4          | 100.000  |

### Supplementary Figure 56. SFC Trace of *rac*-26

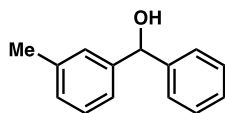

*rac*-26

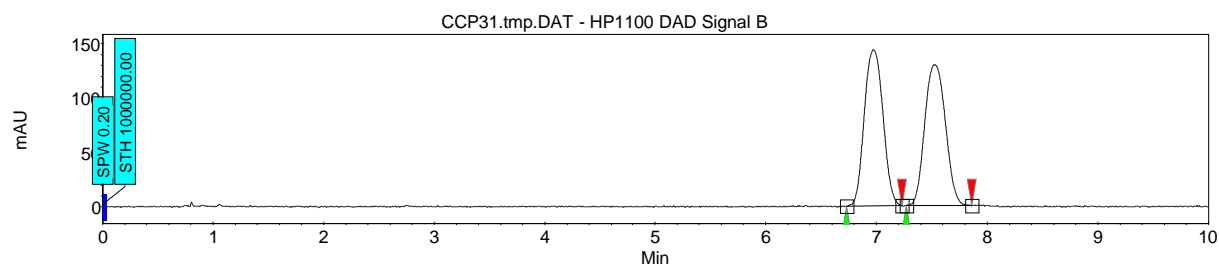

| Index | Name    | Start [Min] | Time [Min] | End [Min] | RT Offset [Min] | Quantity [% Area] | Height [μV] | Area [μV.Min] | Area [%] |
|-------|---------|-------------|------------|-----------|-----------------|-------------------|-------------|---------------|----------|
| 1     | UNKNOWN | 6.73        | 6.97       | 7.23      | 0.00            | 50.00             | 143.1       | 28.1          | 50.003   |
| 2     | UNKNOWN | 7.27        | 7.52       | 7.86      | 0.00            | 50.00             | 129.3       | 28.1          | 49.997   |
| Total |         |             |            |           |                 | 100.00            | 272.4       | 56.1          | 100.000  |

### Supplementary Figure 57. SFC Trace of (*R*)-26

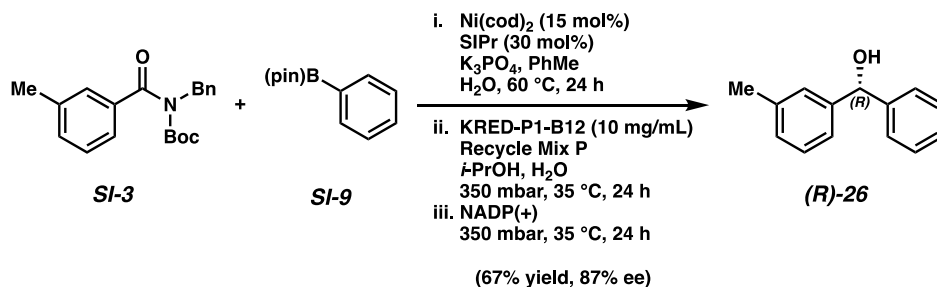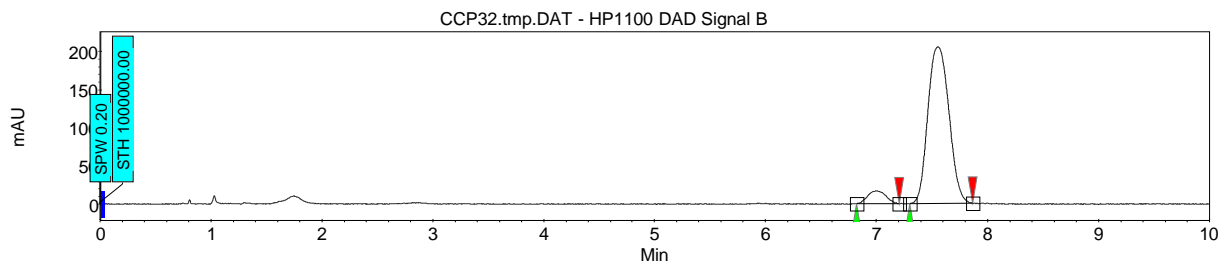

| Index | Name    | Start [Min] | Time [Min] | End [Min] | RT Offset [Min] | Quantity [% Area] | Height [μV] | Area [μV.Min] | Area [%] |
|-------|---------|-------------|------------|-----------|-----------------|-------------------|-------------|---------------|----------|
| 1     | UNKNOWN | 6.82        | 7.00       | 7.21      | 0.00            | 6.62              | 16.9        | 3.2           | 6.622    |
| 2     | UNKNOWN | 7.30        | 7.55       | 7.86      | 0.00            | 93.38             | 204.6       | 45.1          | 93.378   |
| Total |         |             |            |           |                 | 100.00            | 221.5       | 48.3          | 100.000  |

### Supplementary Figure 58. SFC Trace of *rac*-27

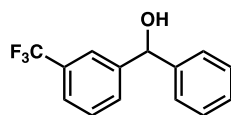

*rac*-27

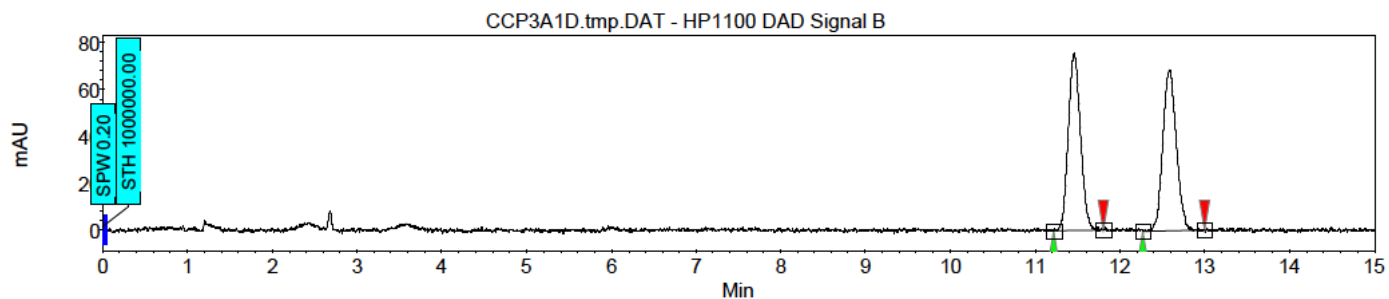

| Index | Name    | Start | Time  | End   | RT Offset | Quantity | Height     | Area           | Area    |
|-------|---------|-------|-------|-------|-----------|----------|------------|----------------|---------|
|       |         | [Min] | [Min] | [Min] | [Min]     | [% Area] | [ $\mu$ V] | [ $\mu$ V.Min] | [%]     |
| 1     | UNKNOWN | 11.22 | 11.46 | 11.81 | 0.00      | 49.85    | 75.3       | 12.5           | 49.845  |
| 2     | UNKNOWN | 12.27 | 12.58 | 13.00 | 0.00      | 50.15    | 68.7       | 12.6           | 50.155  |
| Total |         |       |       |       |           | 100.00   | 144.0      | 25.1           | 100.000 |

### Supplementary Figure 59. SFC Trace of (*R*)-27

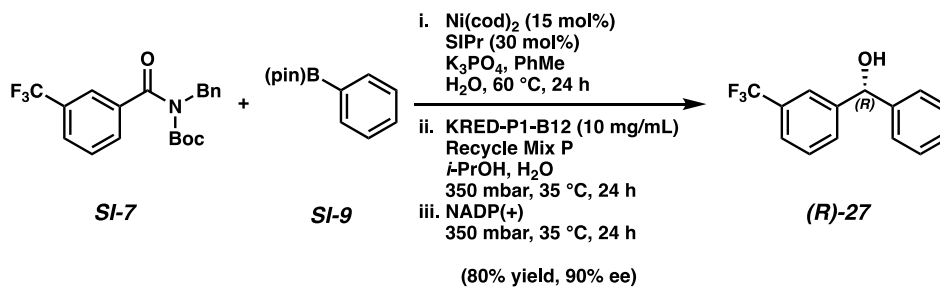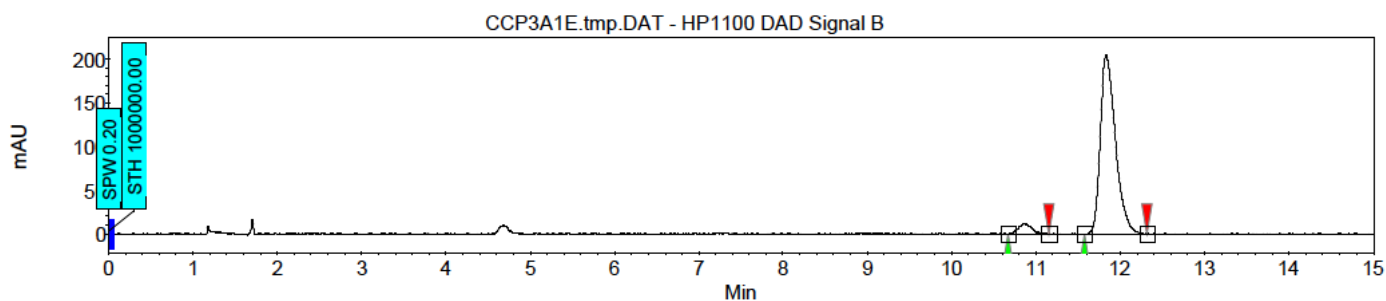

| Index | Name    | Start | Time  | End   | RT Offset | Quantity | Height     | Area           | Area    |
|-------|---------|-------|-------|-------|-----------|----------|------------|----------------|---------|
|       |         | [Min] | [Min] | [Min] | [Min]     | [% Area] | [ $\mu$ V] | [ $\mu$ V.Min] | [%]     |
| 1     | UNKNOWN | 10.67 | 10.87 | 11.15 | 0.00      | 4.83     | 11.4       | 2.2            | 4.825   |
| 2     | UNKNOWN | 11.57 | 11.84 | 12.32 | 0.00      | 95.17    | 203.9      | 42.6           | 95.175  |
| Total |         |       |       |       |           | 100.00   | 215.3      | 44.8           | 100.000 |

### Supplementary Figure 60. SFC Trace of *rac*-28

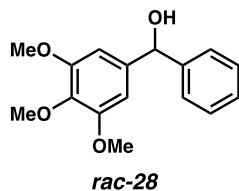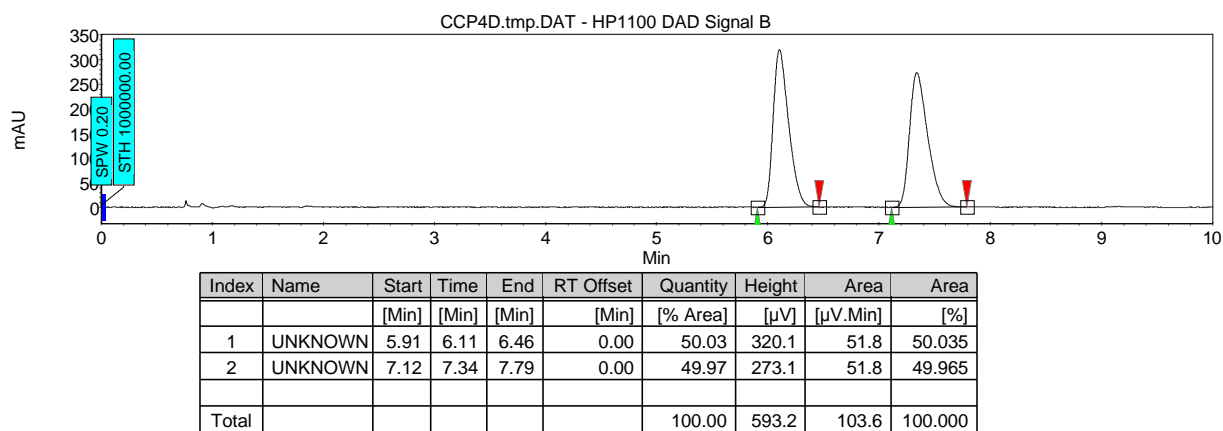

### Supplementary Figure 61. SFC Trace of (*R*)-28

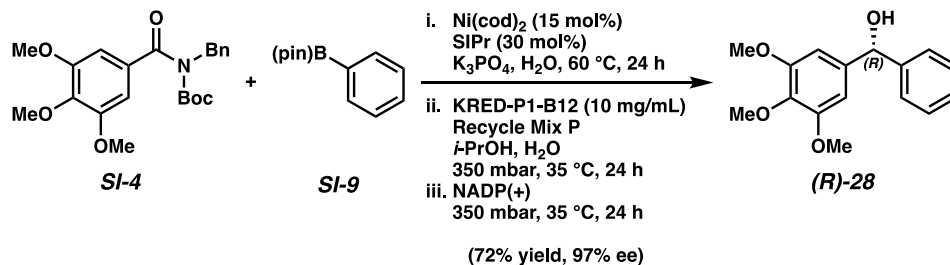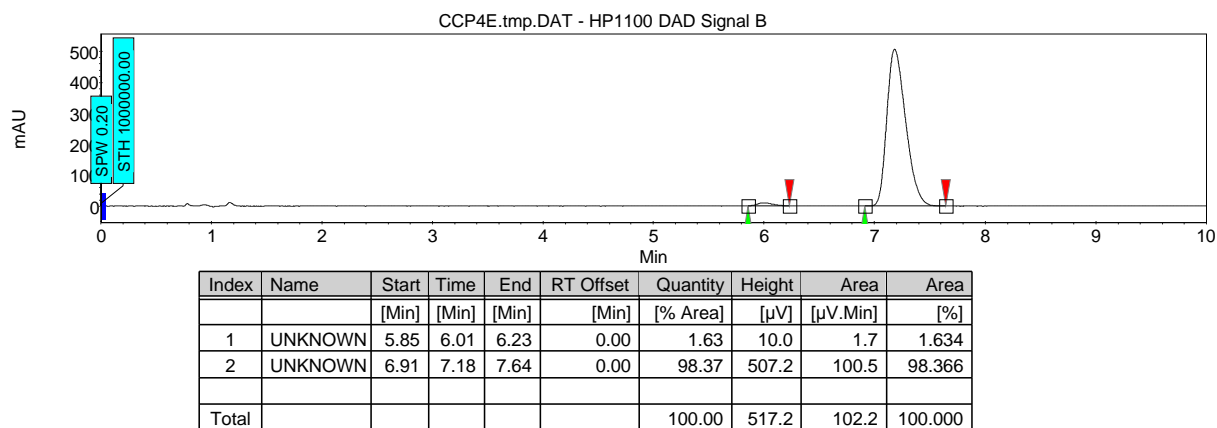



### Supplementary Figure 62. SFC Trace of (S)-27

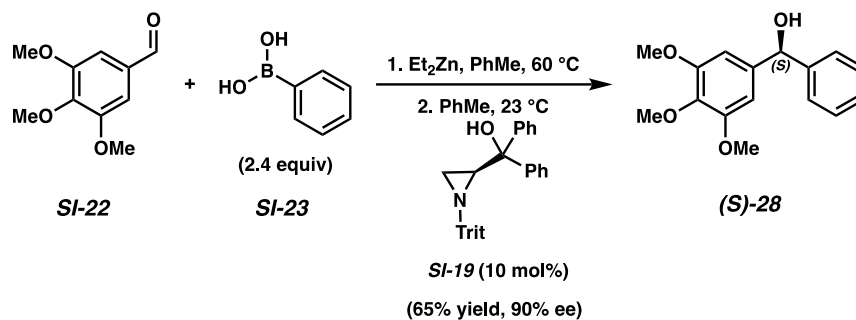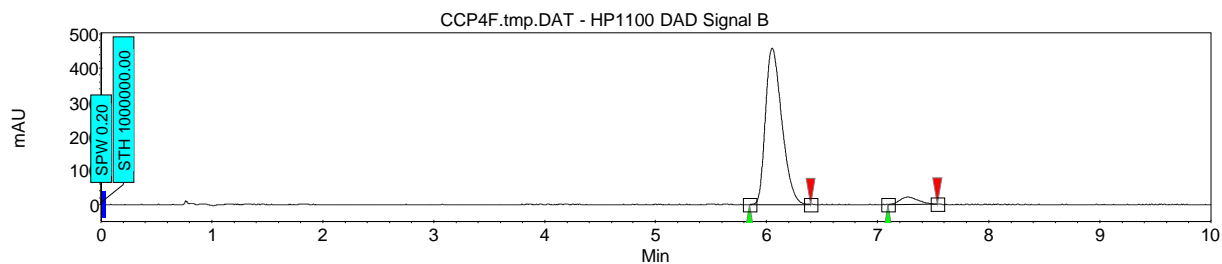

| Index | Name    | Start [Min] | Time [Min] | End [Min] | RT Offset [Min] | Quantity [% Area] | Height [μV] | Area [μV.Min] | Area [%] |
|-------|---------|-------------|------------|-----------|-----------------|-------------------|-------------|---------------|----------|
| 1     | UNKNOWN | 5.85        | 6.05       | 6.40      | 0.00            | 94.92             | 458.4       | 78.2          | 94.920   |
| 2     | UNKNOWN | 7.09        | 7.27       | 7.54      | 0.00            | 5.08              | 21.9        | 4.2           | 5.080    |
| Total |         |             |            |           |                 | 100.00            | 480.3       | 82.4          | 100.000  |

### Supplementary Figure 63. SFC Trace of *rac*-29

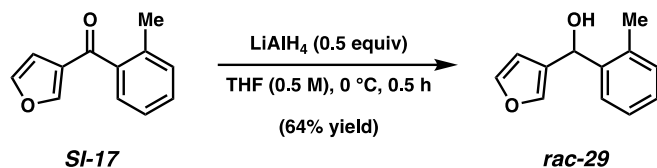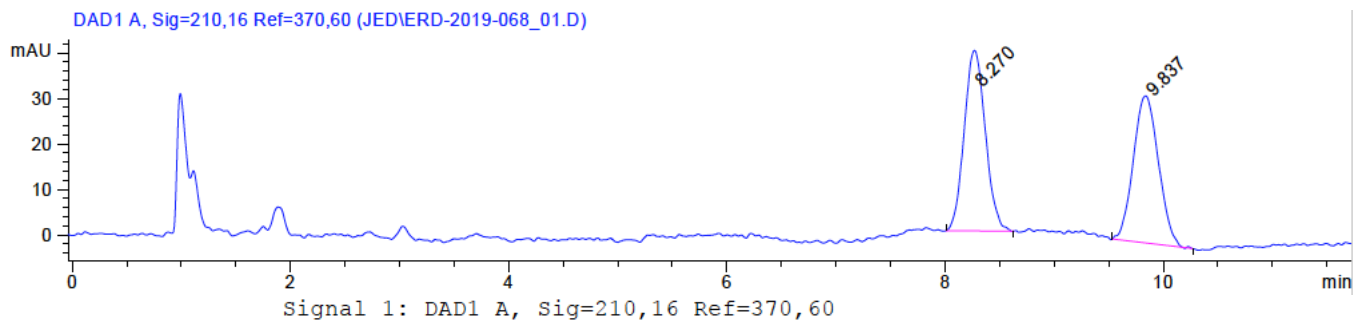

| Peak # | RetTime [min] | Type | Width [min] | Area [mAU*s] | Height [mAU] | Area %  |
|--------|---------------|------|-------------|--------------|--------------|---------|
| 1      | 8.270         | BB   | 0.2091      | 534.61139    | 39.69661     | 50.8078 |
| 2      | 9.837         | BB   | 0.2450      | 517.61230    | 32.28548     | 49.1922 |

### Supplementary Figure 64. SFC Trace of (*S*)-29

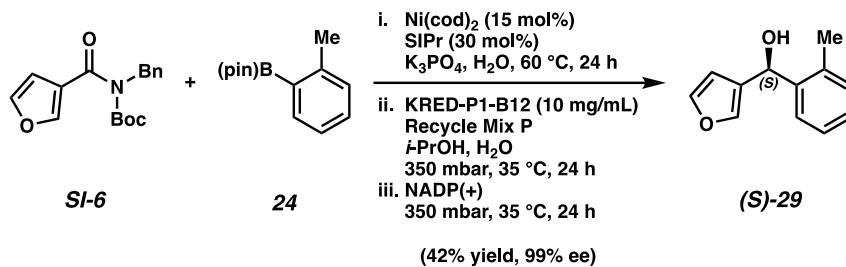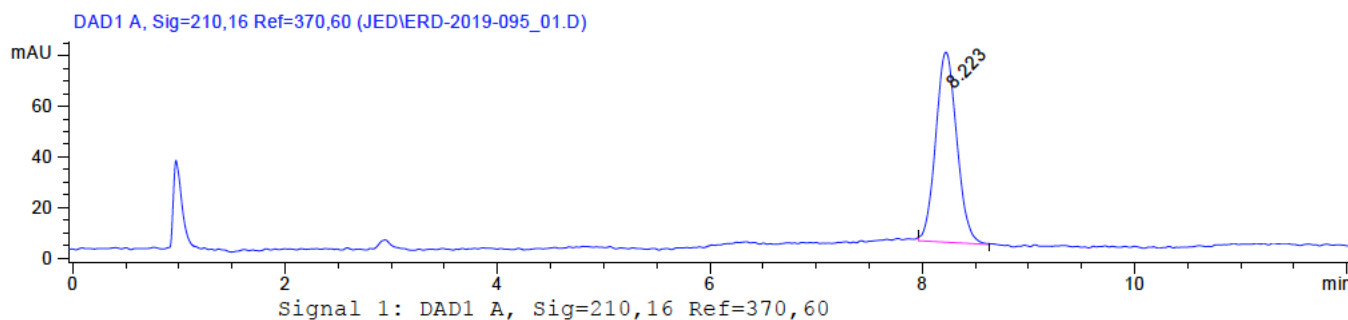

| Peak # | RetTime [min] | Type | Width [min] | Area [mAU*s] | Height [mAU] | Area %   |
|--------|---------------|------|-------------|--------------|--------------|----------|
| 1      | 8.223         | BB   | 0.2111      | 1037.91272   | 75.17302     | 100.0000 |

### Supplementary Figure 65. SFC Trace of *rac*-21

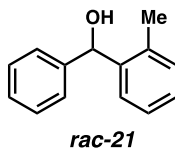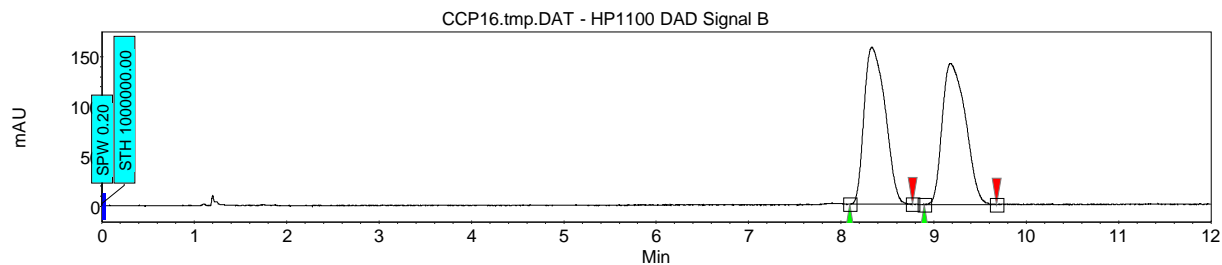

| Index | Name    | Start [Min] | Time [Min] | End [Min] | RT Offset [Min] | Quantity [% Area] | Height [μV] | Area [μV.Min] | Area [%] |
|-------|---------|-------------|------------|-----------|-----------------|-------------------|-------------|---------------|----------|
| 1     | UNKNOWN | 8.09        | 8.33       | 8.77      | 0.00            | 50.05             | 157.1       | 41.3          | 50.050   |
| 2     | UNKNOWN | 8.90        | 9.18       | 9.68      | 0.00            | 49.95             | 141.4       | 41.2          | 49.950   |
| Total |         |             |            |           |                 | 100.00            | 298.5       | 82.5          | 100.000  |

### Supplementary Figure 66. SFC Trace of (*R*)-21

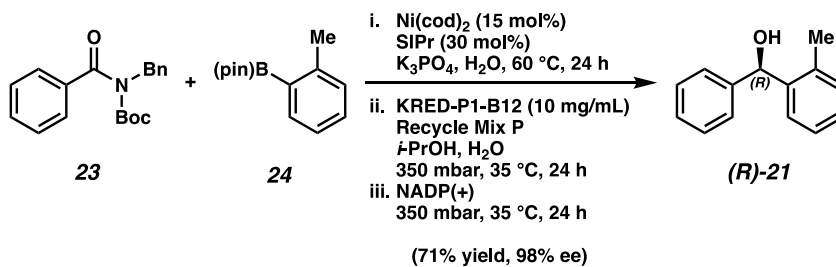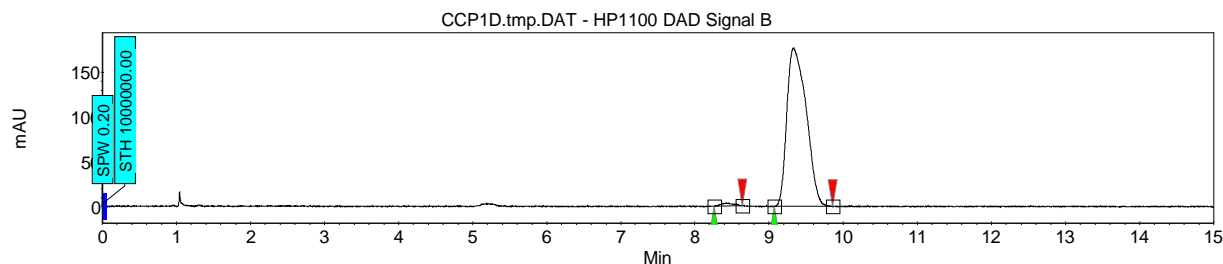

| Index | Name    | Start [Min] | Time [Min] | End [Min] | RT Offset [Min] | Quantity [% Area] | Height [μV] | Area [μV.Min] | Area [%] |
|-------|---------|-------------|------------|-----------|-----------------|-------------------|-------------|---------------|----------|
| 1     | UNKNOWN | 8.26        | 8.43       | 8.64      | 0.00            | 1.15              | 3.1         | 0.6           | 1.147    |
| 2     | UNKNOWN | 9.07        | 9.33       | 9.86      | 0.00            | 98.85             | 176.0       | 53.2          | 98.853   |
| Total |         |             |            |           |                 | 100.00            | 179.1       | 53.9          | 100.000  |

### Supplementary Figure 67. SFC Trace of (S)-21

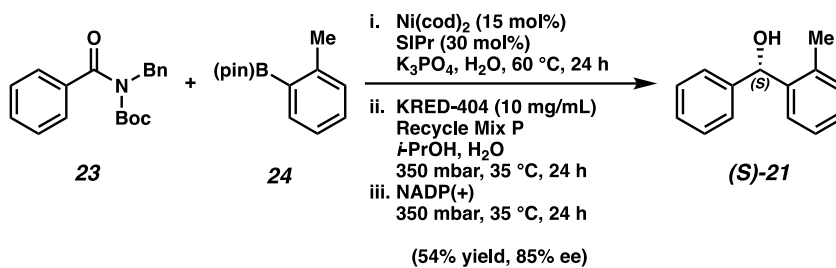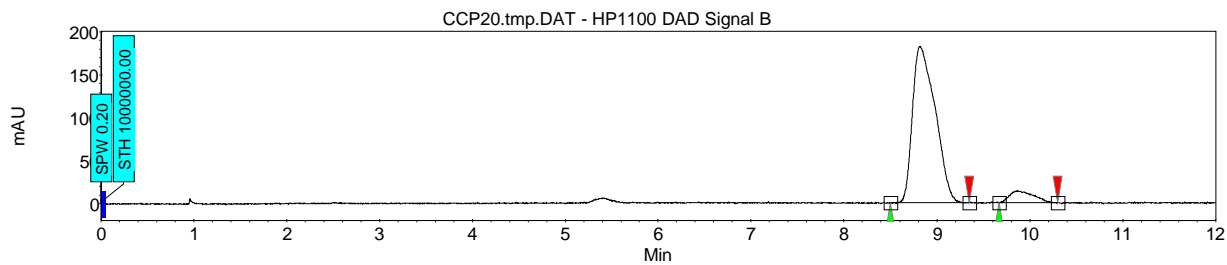

| Index | Name    | Start | Time  | End   | RT Offset | Quantity | Height            | Area                               | Area    |
|-------|---------|-------|-------|-------|-----------|----------|-------------------|------------------------------------|---------|
|       |         | [Min] | [Min] | [Min] | [Min]     | [% Area] | [ $\mu\text{V}$ ] | [ $\mu\text{V} \cdot \text{Min}$ ] | [%]     |
| 1     | UNKNOWN | 8.50  | 8.82  | 9.35  | 0.00      | 92.64    | 181.6             | 51.5                               | 92.637  |
| 2     | UNKNOWN | 9.67  | 9.86  | 10.30 | 0.00      | 7.36     | 13.6              | 4.1                                | 7.363   |
| Total |         |       |       |       |           | 100.00   | 195.1             | 55.6                               | 100.000 |

### Supplementary Figure 68. SFC Trace of *rac*-30

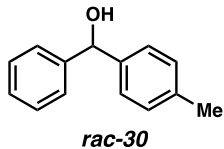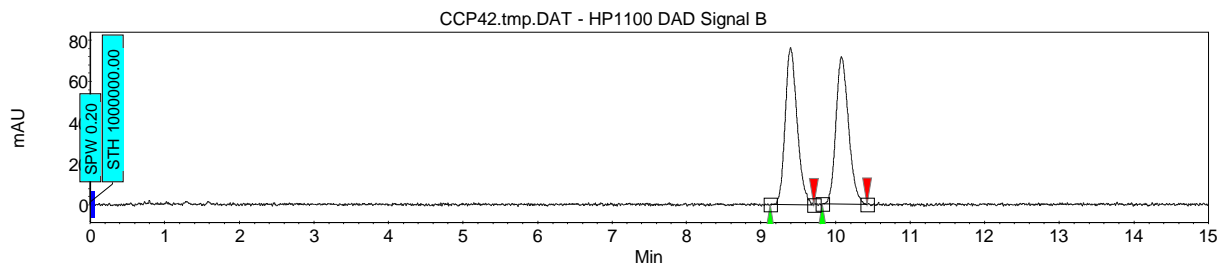

| Index | Name    | Start [Min] | Time [Min] | End [Min] | RT Offset [Min] | Quantity [% Area] | Height [μV] | Area [μV.Min] | Area [%] |
|-------|---------|-------------|------------|-----------|-----------------|-------------------|-------------|---------------|----------|
| 1     | UNKNOWN | 9.13        | 9.40       | 9.71      | 0.00            | 50.00             | 76.1        | 14.1          | 50.000   |
| 2     | UNKNOWN | 9.82        | 10.08      | 10.43     | 0.00            | 50.00             | 71.5        | 14.1          | 50.000   |
| Total |         |             |            |           |                 | 100.00            | 147.6       | 28.1          | 100.000  |

### Supplementary Figure 69. SFC Trace of (*R*)-30

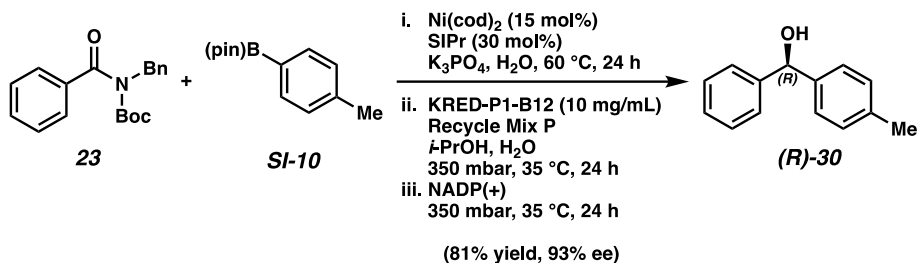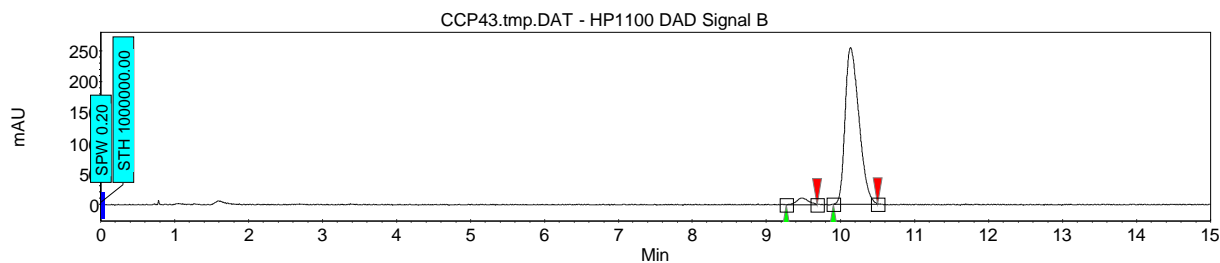

| Index | Name    | Start [Min] | Time [Min] | End [Min] | RT Offset [Min] | Quantity [% Area] | Height [μV] | Area [μV.Min] | Area [%] |
|-------|---------|-------------|------------|-----------|-----------------|-------------------|-------------|---------------|----------|
| 1     | UNKNOWN | 9.27        | 9.49       | 9.69      | 0.00            | 3.45              | 10.9        | 2.0           | 3.452    |
| 2     | UNKNOWN | 9.91        | 10.14      | 10.51     | 0.00            | 96.55             | 254.5       | 55.1          | 96.548   |
| Total |         |             |            |           |                 | 100.00            | 265.4       | 57.1          | 100.000  |

### Supplementary Figure 70. SFC Trace of *rac*-22

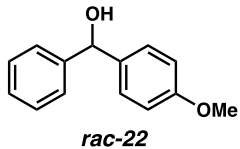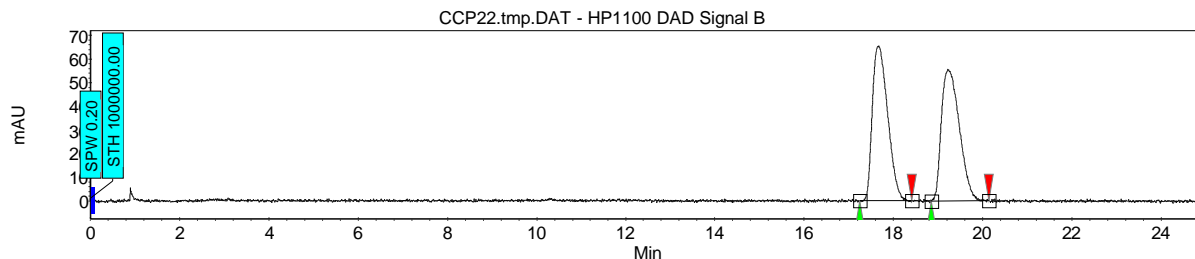

| Index | Name    | Start [Min] | Time [Min] | End [Min] | RT Offset [Min] | Quantity [% Area] | Height [μV] | Area [μV.Min] | Area [%] |
|-------|---------|-------------|------------|-----------|-----------------|-------------------|-------------|---------------|----------|
| 1     | UNKNOWN | 17.25       | 17.67      | 18.41     | 0.00            | 50.12             | 65.4        | 26.0          | 50.119   |
| 2     | UNKNOWN | 18.85       | 19.22      | 20.14     | 0.00            | 49.88             | 55.7        | 25.9          | 49.881   |
| Total |         |             |            |           |                 | 100.00            | 121.1       | 51.8          | 100.000  |

### Supplementary Figure 71. SFC Trace of (*R*)-22

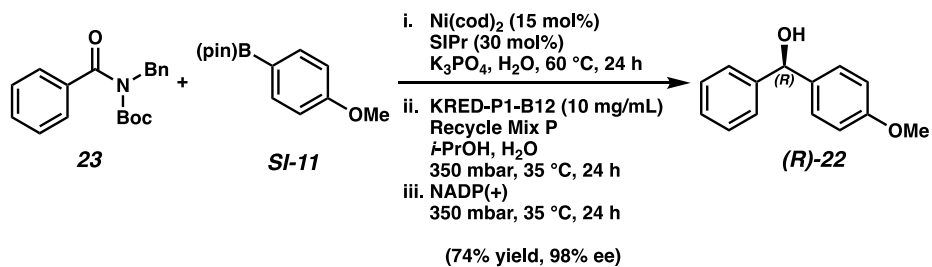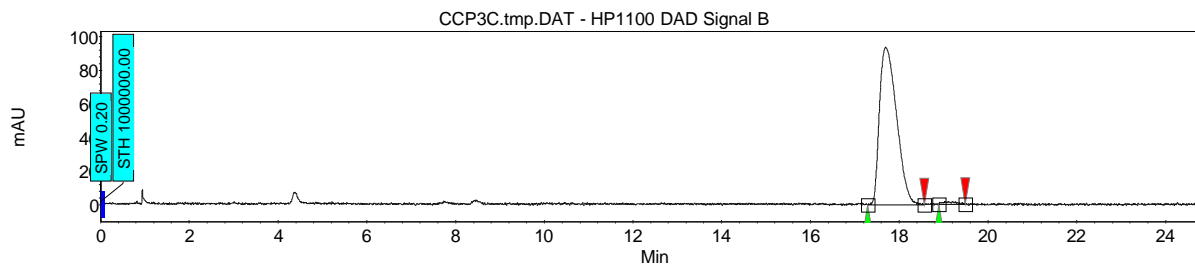

| Index | Name    | Start [Min] | Time [Min] | End [Min] | RT Offset [Min] | Quantity [% Area] | Height [μV] | Area [μV.Min] | Area [%] |
|-------|---------|-------------|------------|-----------|-----------------|-------------------|-------------|---------------|----------|
| 1     | UNKNOWN | 17.29       | 17.70      | 18.57     | 0.00            | 98.88             | 94.0        | 42.0          | 98.875   |
| 2     | UNKNOWN | 18.89       | 19.26      | 19.49     | 0.00            | 1.12              | 1.5         | 0.5           | 1.125    |
| Total |         |             |            |           |                 | 100.00            | 95.5        | 42.5          | 100.000  |

### Supplementary Figure 72. SFC Trace of *rac*-31

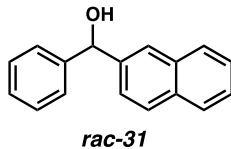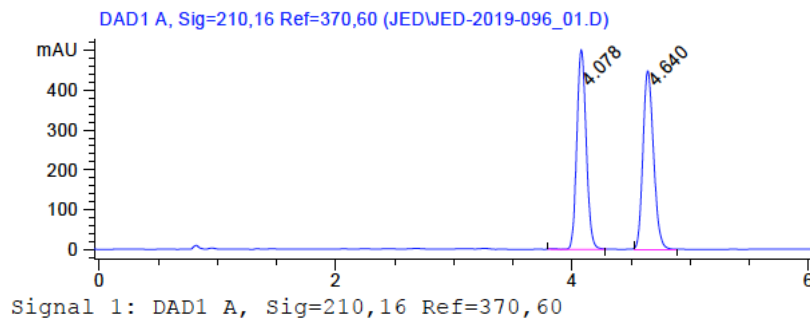

### Supplementary Figure 73. SFC Trace of (*R*)-31

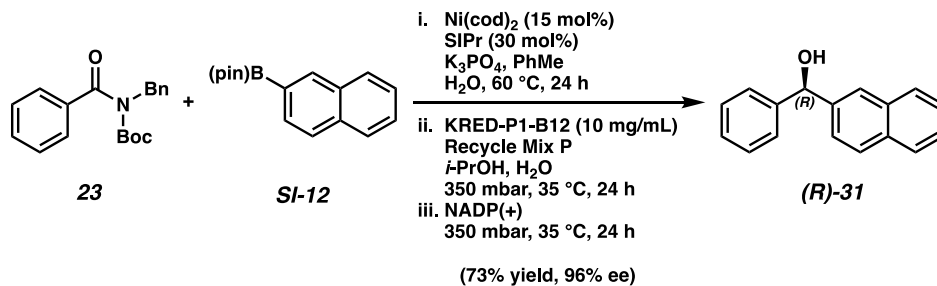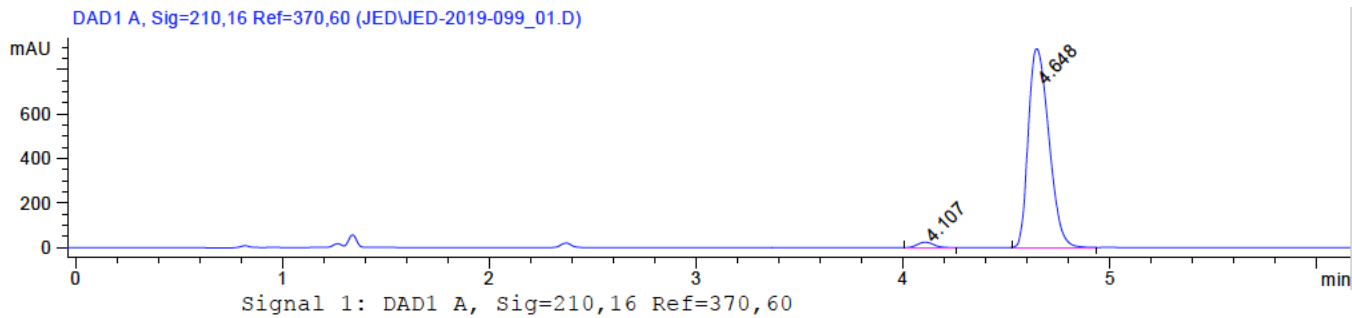

### Supplementary Figure 74. SFC Trace of *rac*-32

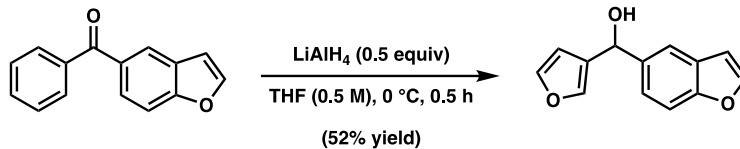

**SI-18**

***rac*-32**

DAD1 A, Sig=210,16 Ref=370,60 (JED\ERD-2019-067\_02.D)

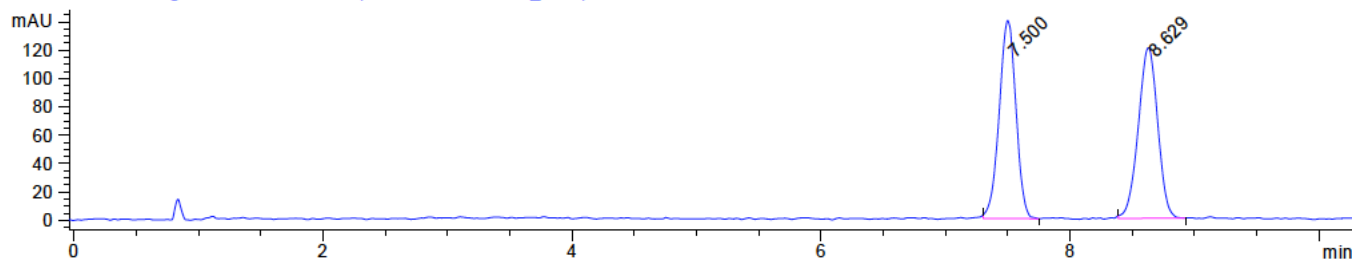

| Peak # | RetTime [min] | Type | Width [min] | Area [mAU*s] | Height [mAU] | Area %  |
|--------|---------------|------|-------------|--------------|--------------|---------|
| 1      | 7.500         | BB   | 0.1453      | 1310.44800   | 139.86392    | 50.0445 |
| 2      | 8.629         | BB   | 0.1687      | 1308.11926   | 120.48936    | 49.9555 |

### Supplementary Figure 75. SFC Trace of (*R*)-32

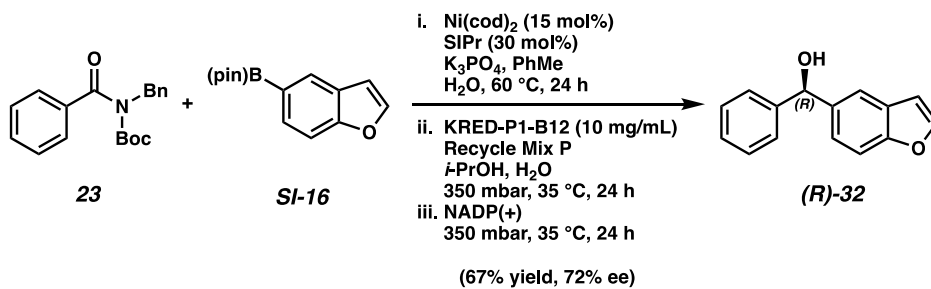

DAD1 A, Sig=210,16 Ref=370,60 (JED\JED-2019-113\_01.D)

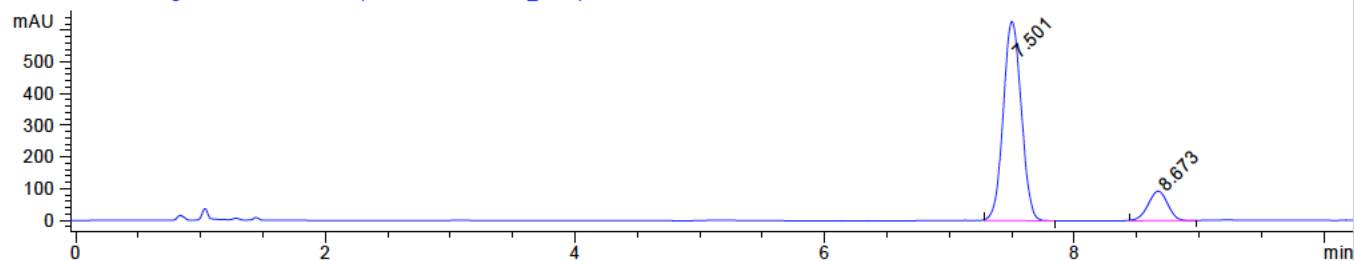

| Peak # | RetTime [min] | Type | Width [min] | Area [mAU*s] | Height [mAU] | Area %  |
|--------|---------------|------|-------------|--------------|--------------|---------|
| 1      | 7.501         | BB   | 0.1592      | 6324.12988   | 629.74841    | 86.1817 |
| 2      | 8.673         | BB   | 0.1707      | 1014.00287   | 93.35793     | 13.8183 |



### Supplementary Figure 76. SFC Trace of *rac*-33

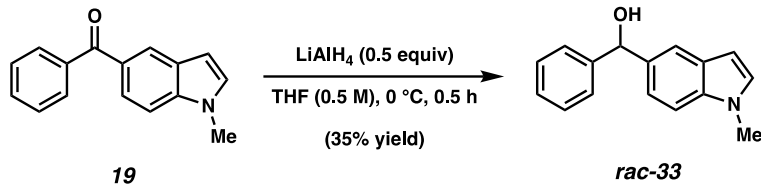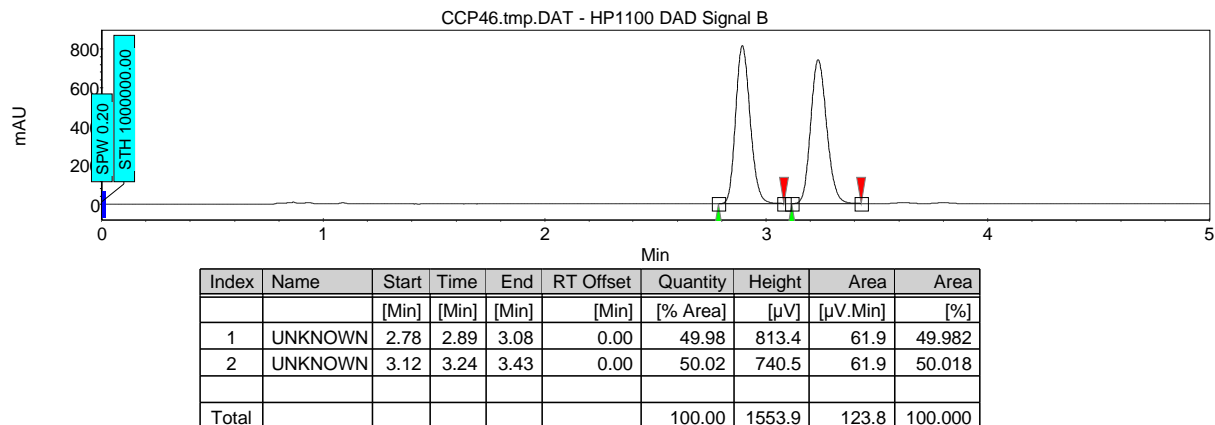

### Supplementary Figure 77. SFC Trace of (*R*)-33

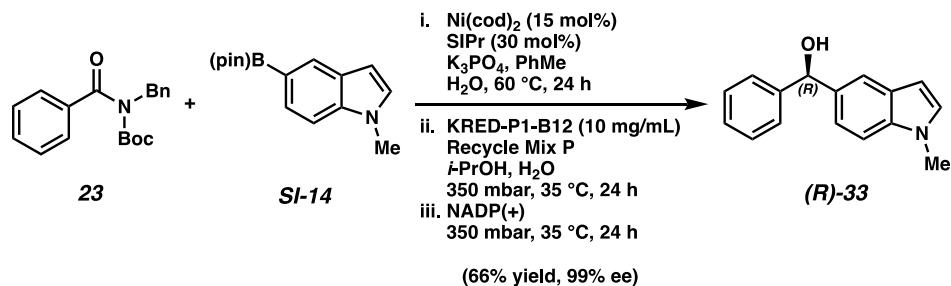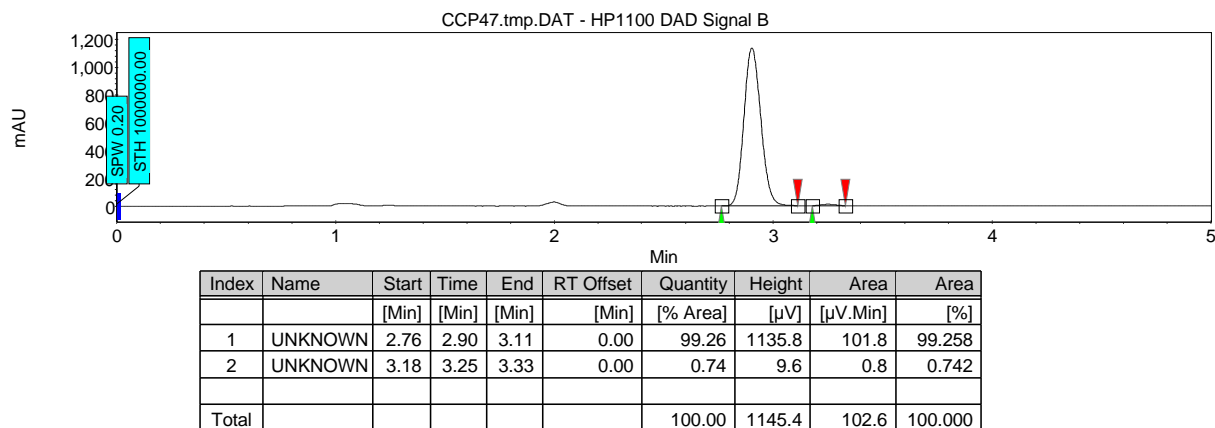

### Supplementary Figure 78. SFC Trace of (*R*)-33

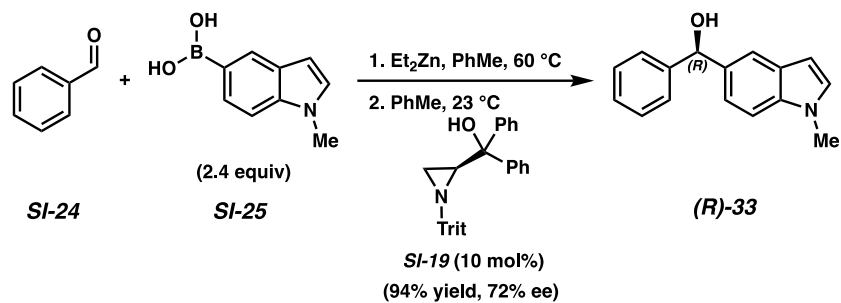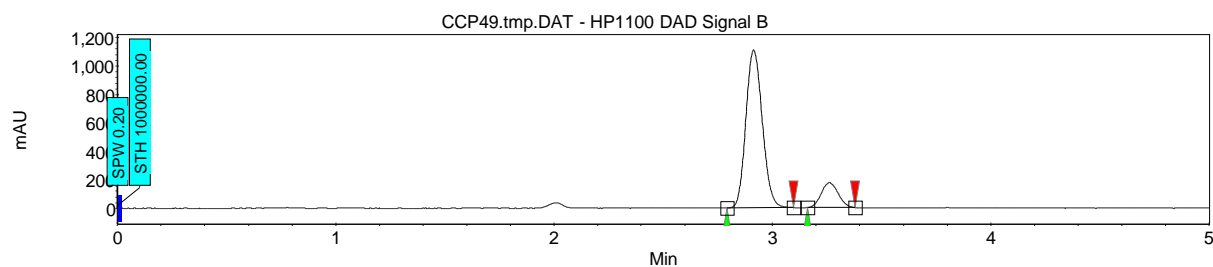

| Index | Name    | Start [Min] | Time [Min] | End [Min] | RT Offset [Min] | Quantity [% Area] | Height [μV] | Area [μV.Min] | Area [%] |
|-------|---------|-------------|------------|-----------|-----------------|-------------------|-------------|---------------|----------|
| 1     | UNKNOWN | 2.79        | 2.92       | 3.10      | 0.00            | 86.03             | 1108.9      | 96.9          | 86.030   |
| 2     | UNKNOWN | 3.16        | 3.26       | 3.38      | 0.00            | 13.97             | 176.7       | 15.7          | 13.970   |
| Total |         |             |            |           |                 | 100.00            | 1285.6      | 112.6         | 100.000  |
